# Supplementary material for: Prognostic factors for favorable outcomes after veno-venous extracorporeal membrane oxygenation in critical care patients with COVID-19
Source: PLoS One. 2023 Jan 20;18(1):e0280502. doi: 10.1371/journal.pone.0280502 (PMC9858373; doi:10.1371/journal.pone.0280502)
Supplement: S1 Appendix — (XLSX) [file pone.0280502.s001.xlsx]

## Sheet: basic data
Pat-Nr	age	gender	BMI	previous illness	cardiovascular	pulmonary	renal	endocrinologic	gastrointestinal	metabolic	dermatologic	neurologic	orthopedic	gynecological/urological	malignant disease	obesity	nox	infection	others	immunosuppression	onset-ECMO (days)	intubation-ECMO (days)	start ECMO	ECMO start at external hospital	duration ECMO (days)	outcome	died on ECMO	cause of death	ECMO-death
1	59	0	26	aHT, DM II	1	0	0	1	0	0	0	0	0	0	0	0	0	0	0	0	17	8	2021-12-20 14:00:00	1	134	1	0	4	150
2	53	0	24.9	aHT, psoriasis	1	0	0	0	0	0	1	0	0	0	0	0	0	0	0	0	21	7	2021-12-30 13:30:00	0	16	0	0
3	42	0	30	obesity, nicotine abuse	0	0	0	0	0	0	0	0	0	0	0	1	1	0	0	0	8	4	2021-12-28 19:55:00	0	33	1	1	1	33
4	41	0	31	cardiomegaly with LV-hypertrophy, sleep apnoea, obesity	1	0	0	0	0	0	0	0	0	0	0	1	0	0	1	0	13	6	2021-12-19 11:10:00	0	45	0	0
5	45	1	29.4	non	0	0	0	0	0	0	0	0	0	0	0	0	0	0	0	0	23	7	2021-12-18 18:20:00	1	25	1	1	2	25
6	55	0	32.1	obesity, cholecystolithiasis	0	0	0	0	1	0	0	0	0	0	0	1	0	0	0	0	13	6	2021-12-15 16:50:00	1	19	0	0
7	30	0	31.1	obesity	0	0	0	0	0	0	0	0	0	0	0	1	0	0	0	0	16	0	2021-12-13 14:35:00	1	54	1	1	2	53
8	55	0	32.5	aHT, obesity, s.p. nicotine abuse	1	0	0	0	0	0	0	0	0	0	0	1	1	0	0	0	14	2	2021-12-11 19:25:00	1	47	0	0
9	41	0	34.2	cholecystolithiasis, obesity	0	0	0	0	1	0	0	0	0	0	0	1	0	0	0	0	13	0	2021-12-08 23:30:00	0	35	0	0
10	53	0	25.1	aHT, hypothyroidism, s.p. hep B	1	0	0	1	0	0	0	0	0	0	0	0	0	1	0	0	15	2	2021-12-08 22:55:00	0	18	0	0
11	53	0	28.3	non	0	0	0	0	0	0	0	0	0	0	0	0	0	0	0	0	17	1	2021-12-06 13:20:00	1	28	0	0
12	41	0	25.4	cor pulmonale	1	0	0	0	0	0	0	0	0	0	0	0	0	0	0	0	20	7	2021-12-06 11:25:00	0	7	0	0
13	55	0	38	aHT, CHD, DM II, s.p. nicotine abuse, cholecystolithiasis, obesity	1	0	0	1	1	0	0	0	0	0	0	1	1	0	0	0	9	0	2021-12-01 21:05:00	1	21	0	0
14	42	0	32.1	obesity, psoriasis vulgaris	0	0	0	0	0	0	1	0	0	0	0	1	0	0	0	0	15	8	2021-11-25 10:12:00	0	13	1	1	1	13
15	54	0	27.8	non	0	0	0	0	0	0	0	0	0	0	0	0	0	0	0	0	8	2	2021-11-23 18:49:00	0	56	0	0
16	48	1	43	s.p. perforated sigmoid diveritculitis with peritonitis, s.p. omphalectomy + ovariectomy, s.p. pulmonal artery embolism (PAE) with infarction pneumonia, abdominal wall seroma, lymphedema III, hypothyroidism, obesity per magna	1	1	0	1	1	0	0	0	0	1	0	1	0	0	1	0	8	0	2021-11-20 15:21:00	0	65	0	0
17	62	0	38.7	obesity	0	0	0	0	0	0	0	0	0	0	0	1	0	0	0	0	5	0	2021-11-19 14:35:00	1	74	0	0
18	60	0	43.2	obesity	0	0	0	0	0	0	0	0	0	0	0	1	0	0	0	0	10	8	2021-11-19 10:15:00	0	52	0	0
19	53	1	51.4	obesity II, hypothyroidism, s.p. lap band surgery, s.p. total knee arthroplastiy (TKA) re	0	0	0	1	1	0	0	0	1	0	0	1	0	0	0	0	24	8	2021-11-18 11:25:00	0	20	0	0
20	48	1	39.1	aHT, obesity, OHS, s.p. 3 caesarean section/sterilization, s.p. laparotomy, s.p. appendectomy	1	1	0	0	1	0	0	0	0	1	0	1	0	0	0	0	22	12	2021-11-13 20:50:00	0	10	0	0
21	51	0	29.4	aHT, CKD (G2A1) by ADPKD, hyperlipidemia, presbycusis	1	0	1	0	0	1	0	0	0	0	0	0	0	0	1	0	19	1	2021-11-13 15:40:00	1	39	1	1	3	38
22	57	0	26.4	herpes zoster V1, s.p. CHD, aHT, nicotine abuse	1	0	0	0	0	0	0	0	0	0	0	0	1	1	0	0	15	3	2021-11-12 17:10:00	1	10	0	0
23	61	0	30.9	aHT, obesity, s.p. bakteremia staph. hominis	1	0	0	0	0	0	0	0	0	0	0	1	0	1	0	0	11	4	2021-11-12 12:00:00	1	13	1	0	1	35
24	52	0	31	obesity	0	0	0	0	0	0	0	0	0	0	0	1	0	0	0	0	7	6	2021-11-12 09:30:00	1	26	0	0
25	63	0	32.9	aHT, DM II, hyperlipidemia/obesity, hyperuricemia	1	0	0	1	0	1	0	0	0	0	0	1	0	0	0	0	19	12	2021-11-10 17:50:00	1	37	1	1	3	37
26	66	1	26.7	aHT, s.p. adnexectomy and hysteroscopy + abrasion, s.p. sigmoid perforation, recurrent thrombophlebitis	1	0	0	0	1	0	0	0	0	1	0	0	0	1	0	0	16	6	2021-11-08 13:10:00	1	66	0	0
27	22	0	39.6	autism, Smith Magenis Syndrome (SMS), obesity	0	0	0	0	0	0	0	0	0	0	0	1	0	0	1	0	4	1	2021-11-06 09:10:00	1	7	1	1	2	6
28	63	0	26.1	non	0	0	0	0	0	0	0	0	0	0	0	0	0	0	0	0	20	9	2021-10-22 00:58:00	1	33	0	0
29	62	1	36.7	s.p. pneumonia, hydrocephalus with VP-shunt, s.p. AVRT with ablation of AV-node, DM II, hyperlipidemia/obesity, leg-hugging sensomotoric polyneuropathy, chronic renal failure, recurrent hypokalemia, steatosis hepatis, hypothyriodism, s.p. reactive depressive fatigue syndrome, s.p. cholecystectomy, s.p. appendectomy, s.p. uterine fibroid, s.p. ovarectomy, chronic callus abscess	1	1	1	1	1	1	0	1	0	1	0	1	0	0	1	0	5	1	2021-10-20 13:25:00	1	8	0	0
30	45	0	29.4	non	0	0	0	0	0	0	0	0	0	0	0	0	0	0	0	0	7	1	2021-10-19 18:55:00	1	33	0	0
31	55	0	30.9	obesity	0	0	0	0	0	0	0	0	0	0	0	1	0	0	0	0	23	15	2021-10-13 22:10:00	1	75	0	0
32	55	0	24.9	non	0	0	0	0	0	0	0	0	0	0	0	0	0	0	0	0	13	6	2021-10-10 11:25:00	0	21	0	0
33	46	0	29.3	aHT, panic attacks	1	0	0	0	0	0	0	0	0	0	0	0	0	0	1	0	10	0	2021-10-08 16:30:00	1	9	0	0
34	68	0	26.1	DM II	0	0	0	1	0	0	0	0	0	0	0	0	0	0	0	0	11	2	2021-10-01 12:30:00	0	36	1	1	1	35
35	43	0	38	DCM (EF 40%), s.p. nicotine abuse, aHT, s.p. appendectomy, obesity	1	0	0	0	1	0	0	0	0	0	0	1	1	0	0	0	13	0	2021-09-27 15:45:00	1	26	0	0
36	62	0	27.8	aHT, steatosis hepatis	1	0	0	0	1	0	0	0	0	0	0	0	0	0	0	0	22	8	2021-09-25 15:40:00	1	53	1	1	2	52
37	43	0	34.2	obesity	0	0	0	0	0	0	0	0	0	0	0	1	0	0	0	0	12	2	2021-09-22 13:15:00	1	93	0	0
38	58	1	30.1	iron deficiency anaemia, gastritis, obesity, aHT	1	0	0	0	1	1	0	0	0	0	0	1	0	0	0	0	6	1	2021-09-19 15:50:00	0	10	0	0
39	66	0	23.5	ulcerative colitis, BPH	0	0	0	0	1	0	0	0	0	1	0	0	0	0	0	1	31	19	2021-09-16 17:40:00	1	24	1	1	2	23
40	55	1	25.4	non	0	0	0	0	0	0	0	0	0	0	0	0	0	0	0	0	6	1	2021-09-12 13:30:00	1	23	1	1	4	22
41	51	1	42.4	rheumatoid arhtritis (RA), obesity III, aHT, DM II, ulcerative colitis, Crohn's disease, chronic pain syndrome by degenerative spine changes, s.p. SAB of unknwon origin	1	0	0	1	1	0	0	1	1	0	0	1	0	0	0	1	10	2	2021-09-09 15:10:00	1	26	0	0
42	47	0	24.2	aHT	1	0	0	0	0	0	0	0	0	0	0	0	0	0	0	0	12	0	2021-08-17 12:40:00	1	15	0	0
43	58	0	26.9	non	0	0	0	0	0	0	0	0	0	0	0	0	0	0	0	0	13	1	2021-07-25 19:30:00	1	100	1	1	2	100
44	51	1	31.1	obesity per magna, chronic wound healing disorder caused by staph. Aureus	0	0	0	0	0	0	0	0	0	0	0	1	0	1	0	0	10	2	2021-06-09 19:30:00	0	19	0	0
45	51	1	31.1	obesity	0	0	0	0	0	0	0	0	0	0	0	1	0	0	0	0	15	5	2021-06-06 14:40:00	1	14	0	0
46	56	1	36.7	obesity per magna, hypothyriodism, chronic pain syndrome, restless-leg-syndrom (RLS)	0	0	0	1	0	0	0	1	0	0	0	1	0	0	0	0	17	6	2021-05-17 13:00:00	1	36	0	0
47	52	0	32.1	aortic bulb ectasia, childlike bronchial asthma, obesity	1	1	0	0	0	0	0	0	0	0	0	1	0	0	0	0	16	1	2021-05-10 12:10:00	1	17	0	0
48	57	0	39.2	s.p. PTCA by RCX-stenosis with DES, s.p. orthotopic heart-Tx, s.p. allogeneic kidney-Tx, complete right bundle branch block, aHT, LV-hypertrohy, hyperlipoproteinemia, secundary hyperparathyroidism, hyperuricemia, cardiorenal syndrome, sacciform kidney DD kidney cyst, s.p. own ureter connection, melanoma, s.p. hemodialysis, s.p. squamous cell CA, cholecystolithiasis, s.p. umbilical hernia, s.p. ne…	1	0	1	1	1	1	0	0	0	1	1	1	0	1	0	1	17	3	2021-05-09 14:35:00	0	23	1	1	1	22
49	50	0	37	aHT, DM II, obesity II	1	0	0	1	0	0	0	0	0	0	0	1	0	0	0	0	10	4	2021-05-07 01:00:00	1	25	0	0
50	47	0	24.8	aHT, CHD, s.p. PTCA + stent, s.p. bypass, s.p. nicotine abuse	1	0	0	0	0	0	0	0	0	0	0	0	1	0	0	0	15	0	2021-05-04 17:40:00	1	21	0	0
51	59	1	33.1	COPD, aHT, obesity	1	1	0	0	0	0	0	0	0	0	0	1	0	0	0	0	9	4	2021-04-30 17:45:00	1	35	1	1	2	35
52	61	0	24.7	depression, s.p. deep vein thrombosis	1	0	0	0	0	0	0	0	0	0	0	0	0	0	1	0	29	6	2021-04-30 12:30:00	0	19	0	0
53	54	0	26.2	s.p. testicular CA with orchiectomy + nephrectomy, aHT	1	0	1	0	0	0	0	0	0	1	1	0	0	0	0	0	35	26	2021-04-30 00:30:00	0	20	0	0
54	47	0	23.7	s.p. hemorrhoids, s.p. anal vein thrombosis	1	0	0	0	1	0	0	0	0	0	0	0	0	0	0	0	21	1	2021-04-29 02:30:00	1	22	0	0
55	45	0	27.8	PP-MS, Uhthoff's-phenomenon (paresis > 37,7), micturition disturbance with chronic urinary tract infection	0	0	0	0	0	0	0	1	0	1	0	0	0	0	0	0	9	0	2021-04-26 13:00:00	0	17	0	0
56	55	0	29.2	s.p. TBC 1983	0	1	0	0	0	0	0	0	0	0	0	0	0	0	0	0	17	3	2021-04-25 15:10:00	1	20	0	0
57	62	0	26.2	non	0	0	0	0	0	0	0	0	0	0	0	0	0	0	0	0	6	14	2021-04-22 18:05:00	1	31	1	1	2	31
58	45	0	25.4	urinary stasis III with hydronephrosis and urinary tract infection, s.p. operational urologic correction, obesity	0	0	1	0	0	0	0	0	0	1	0	1	0	0	0	0	23	15	2021-04-22 16:45:00	0	40	0	0
59	39	0	29.4	DM II, chronic recurrent lumbago, migraine	0	0	0	1	0	0	0	1	1	0	0	0	0	0	0	0	16	6	2021-04-18 12:00:00	1	23	0	0
60	58	1	25	hypothyroidism	0	0	0	1	0	0	0	0	0	0	0	0	0	0	0	0	28	19	2021-04-14 17:35:00	1	62	0	0
61	59	0	27.7	polycythemia vera, aHT, hyperuricemia, chronic non-erosive gastritis, s.p. sigmoid resection by coverd perforated diverticulitis, s.p. hep A	1	0	0	0	1	1	0	0	0	0	0	0	0	1	1	0	19	9	2021-04-06 16:10:00	1	38	0	0
62	48	1	26.9	s.p. thrombophlebitis / thrombosis VSM, uterus myomatosus, lumbago	1	0	0	0	0	0	0	0	1	1	0	0	0	1	0	0	15	0	2021-04-04 19:10:00	0	50	1	1	1	50
63	65	0	32.8	knee effusion by s.p. periprothetic knee joint infection, s.p. Inlay-change+debridement+total synovektomy by acute hematogenous infection of periprothetic total knee arthroplasty, ASK+instillation of Gentamycin, DM, renal failure, s.p. total knee arthroplasty and revision with implantation of a coupled prothesis, bipolar affective disorder/organic personality disorder by s.p. traumatic brain inju…	0	0	1	1	0	1	0	0	1	0	0	1	0	0	1	0	9	0	2021-04-04 15:45:00	1	19	0	0
64	43	1	23.9	hypothyroidism by s.p. thyroidectomy by thyroid-CA, bronchial asthma with recurrent infections	0	1	0	0	0	0	0	0	0	0	1	0	0	0	0	0	20	16	2021-04-03 11:50:00	1	18	0	0
65	52	0	27.7	DM II	0	0	0	1	0	0	0	0	0	0	0	0	0	0	0	0	20	0	2021-04-01 18:45:00	1	24	0	0
66	64	1	39	bronchial asthma, aHT, obesity	1	1	0	0	0	0	0	0	0	0	0	1	0	0	0	0	12	1	2021-03-29 16:30:00	1	18	1	1	1	18
67	61	0	26.6	non	0	0	0	0	0	0	0	0	0	0	0	0	0	0	0	0	21	3	2021-03-28 15:30:00	1	81	0	0
68	55	0	48.4	obesity, OSAS with CPAP-therapy, aHT, bronchial asthma	1	1	0	0	0	0	0	0	0	0	0	1	0	0	1	0	13	0	2021-03-14 18:40:00	1	32	1	1	2	31
69	55	0	45.7	obesity per magna, recurrent varicosis left, crossectomy V. saphena magna	1	0	0	0	0	0	0	0	0	0	0	1	0	0	0	0	12	1	2021-03-13 17:15:00	0	16	0	0
70	54	0	28.7	chronic renal failure after BK-nephritis by immunosuppression, severe chronic GvHD, s.p. autoimmune hemolytic anemia, s.p. conditioning chemo + allogeneic stem cell transplantation, AML, s.p. hemorrhoids, s.p. perianal abscesses, severe osteoporosis with superior endplate impaction lumbar spine, severe hyperuricemia, testosteron deficiency after high-dose chemo, Hb-effective GI bleeding by gastri…	0	0	1	1	1	1	0	0	1	0	1	0	0	0	1	1	10	0	2021-03-06 16:25:00	0	9	1	1	2	9
71	45	0	31.7	nicotine abuse, steatosis hepatis, obesity	0	0	0	0	1	0	0	0	0	0	0	1	1	0	0	0	5	1	2021-03-06 11:25:00	1	39	1	1	2	38
72	27	0	37	Typ-C-gastritis, hyperplastic chronic esophagitis, reactive lymphadenopathy 2018, epilepsy (since 2017, without medication), obesity	0	0	0	0	1	0	0	1	0	0	0	1	0	0	1	0	25	12	2021-03-05 21:40:00	1	14	0	0
73	58	0	27.7	non	0	0	0	0	0	0	0	0	0	0	0	0	0	0	0	0	18	0	2021-03-02 13:40:00	1	15	0	0
74	55	0	29.3	aHT	1	0	0	0	0	0	0	0	0	0	0	0	0	0	0	0	14	0	2021-02-26 18:30:00	1	41	1	0	1	74
75	48	0	24.2	DM, aHT	1	0	0	1	0	0	0	0	0	0	0	0	0	0	0	0	8	0	2021-02-25 20:30:00	1	14	0	0
76	60	0	24.6	acute lumbago, hydrocele right testicle	0	0	0	0	0	0	0	0	1	1	0	0	0	0	0	0	14	4	2021-02-23 17:15:00	1	58	1	1	1	57
77	62	0	35.9	psoriasis, aHT, obesity	1	0	0	0	0	0	1	0	0	0	0	1	0	0	0	0	22	15	2021-02-19 15:40:00	1	54	1	1	1	53
78	53	0	25.4	s.p. pneumonia right, reflux disease	0	1	0	0	1	0	0	0	0	0	0	0	0	0	0	0	16	0	2021-02-13 22:00:00	1	15	0	0
79	40	1	31.2	obesity per magna, s.p. sterilization, s.p. tonsils surgery, s.p. nose surgery	0	0	0	0	0	0	0	0	0	1	0	1	0	0	1	0	7	1	2021-02-08 10:05:00	1	11	0	0
80	73	0	27.7	s.p. cholecystectomy, prostate adenoma	0	0	0	0	1	0	0	0	0	1	0	0	0	0	1	0	25	8	2021-02-07 17:15:00	0	27	1	0	2	75
81	58	1	47.8	aHT, DM II, obesity per magna, hypothyroidism, s.p. deep vein thrombosis, recurrent ulcerations lower leg	1	0	0	1	0	0	1	0	0	0	0	1	0	0	0	0	9	1	2021-02-05 03:00:00	1	8	0	0
82	58	0	27.8	CHD with s.p. PTCA without stent, pulmonary fibrosis by interstitial lung disease, aHT, hypercholesterolemia, obesity, s.p. nicotine abuse	1	1	0	0	0	1	0	0	0	0	0	1	1	0	0	0	27	17	2021-01-31 18:00:00	0	43	1	0	1	94
83	68	0	30.9	CHD with normal systolic EF, s.p. PCI +DES, stenosis A. carotis interna left, aHT, hypothyroidism, polymyalgia rheumatica, activated coxarthrosis right, s.p. hip-TEP left, obesity	1	0	0	1	0	0	0	0	1	0	0	1	0	0	0	0	21	20	2021-01-25 14:10:00	1	79	1	1	1	78
84	60	0	27.7	CHD, s.p. PTCA + DES, DM II, aHT, hyperlipidemia, s.p. nicotine abuse	1	0	0	1	0	1	0	0	0	0	0	0	1	0	0	0	16	0	2021-01-23 20:30:00	1	45	0	0
85	63	0	26	DM II, aHT, CHD, severe aortic valve stenosis, s.p. biologic aortic valve replacement, peripheral arterial occlusive disease (PAOD) left leg	1	0	0	1	0	0	0	0	0	0	0	0	0	0	0	0	16	6	2021-01-21 12:15:00	1	67	1	1	1	89
86	56	0	24.2	s.p. testicular-CA with orchiectomy left, s.p. laparotomy + Resektion lymphnode metastasis + chemo, aortic valve prolapse, aortic and tricuspid valve insufficiency, colon polyps, s.p. sigmoiditis	1	0	0	0	1	0	0	0	0	1	1	0	0	0	0	0	26	13	2021-01-20 13:30:00	1	89	1	1	1	90
87	62	0	27.7	aHT, s.p. disc prolapse, DM II	1	0	0	1	0	0	0	0	1	0	0	0	0	0	0	0	27	1	2021-01-16 12:10:00	0	26	0	0
88	47	0	27.7	aHT, hypothyroidism	1	0	0	1	0	0	0	0	0	0	0	0	0	0	0	0	10	0	2021-01-14 20:10:00	1	17	0	0
89	56	1	27.5	breast CA with axillary lymphnode metastasis left (neoadjuvant chemo), s.p. vaginal hysterectomy + cyst extirpation left ovary + extirpation fibromyeloma right, s.p. malignant melanoma left lower leg, rheumatoid arthritis (RA), lumbago, aHT	1	0	0	0	0	0	0	0	1	1	1	0	0	0	0	0	10	8	2021-01-04 17:10:00	1	11	1	1	3	11
90	62	0	32.7	DM II, sarcoidosis, aHT, COPD, OSAS with CPAP, hyperuricemia, s.p. bacterial pneumonia, s.p. bystander CPR, obesity	1	1	0	1	0	1	0	0	0	0	0	1	0	0	0	0	19	14	2021-01-03 12:50:00	0	64	0	0
91	54	0	35.9	DM II, aHT, obesity, s.p. nicotine abuse, hypercholesterolemia	1	0	0	1	0	1	0	0	0	0	0	1	1	0	0	0	10	1	2021-01-03 03:10:00	1	30	0	0
92	58	0	27.8	hereditary Faktor-V-deficiency, Crohn's disease, primary sclerosing cholangitis	0	0	0	0	1	0	0	0	0	0	0	0	0	0	1	1	17	4	2021-01-01 19:00:00	1	28	1	1	1	28
93	52	0	27.8	aHT, recurrent lumbar syndrome, trunk varices, BPH, s.p. hep E	1	0	0	0	0	0	0	0	1	1	0	0	0	1	0	0	14	6	2021-01-01 12:30:00	1	7	1	1	3	6
94	59	0	27.8	hemoptysis, hyperreactive bronchial system, s.p. TBC, aHT, s.p. lumboischialgia + disc protrusion, s.p. nicotine abuse, nodular goitre	1	1	0	1	0	0	0	0	1	0	0	0	1	0	0	0	13	1	2020-12-29 12:30:00	1	10	1	1	1	10
95	68	0	24.7	reactive depression, s.p. motorcycle accident with arm weighted hemiparesis left, s.p. deep vein thrombosis, dupuytren's disease	1	0	0	0	0	0	0	1	1	0	0	0	0	0	1	0	27	1	2020-12-28 18:19:00	0	38	1	0	1	74
96	67	1	23.4	foraminal stenosis C6 right, s.p. Smith-Robinson-operation HWK 6/7	0	0	0	0	0	0	0	0	1	0	0	0	0	0	0	0	9	7	2020-12-18 14:10:00	1	8	1	0	1	28
97	66	0	20.8	aHT, diffuse coronary sclerosis, cardiomyopathy with apical hypertrophy and hypokinesis of apex, s.p. antral gastritis, hemorrhoids, chronic pain syndrome by polymyalgia+radiculopathy+lumbar syndrome, hyperlipoproteinemia	1	0	0	0	1	1	0	0	1	0	0	0	0	0	0	0	23	17	2020-12-16 17:27:00	0	18	1	1	7	18
98	57	1	27.7	aHT, hypercholesterolemia, vaginal mycosis, s.p. total knee arthroplasty right	1	0	0	0	0	1	0	0	1	1	0	0	0	0	0	0	26	9	2020-12-16 11:00:00	1	13	0	0
99	53	0	35.2	obesity, Down's syndrome, DM	0	0	0	1	0	0	0	0	0	0	0	1	0	0	1	0	19	19	2020-12-14 12:10:00	0	17	1	1	2	16
100	60	0	41.7	aHT, hypodense lesion frontal brain lobe, obesity, steatosis hepatis, lesion on right suprarenal gland, lesion in rigth lower abdomen, s.p. hip-TEP right, s.p. nicotine abuse	1	0	0	0	1	0	0	1	1	0	0	1	1	0	1	0	13	2	2020-12-11 06:50:00	0	46	1	1	2	45
101	47	1	38.1	obesity per magna, s.p. GI bleeding by ASS+Ibuprofen	0	0	0	0	1	0	0	0	0	0	0	1	0	0	0	0	13	3	2020-12-08 10:30:00	1	34	0	0
102	53	0	27.7	bronchial asthma, aplasia A. pulmonalis left, hypoplasia left lung, s.p. nicotine abuse	1	1	0	0	0	0	0	0	0	0	0	0	1	0	0	0	14	2	2020-12-07 11:00:00	0	31	1	0	2	37
103	58	0	27.8	pulmonary emphysema, s.p. nicotine abuse	0	1	0	0	0	0	0	0	0	0	0	0	1	0	0	0	28	2	2020-12-02 12:20:00	0	69	0	0
104	63	0	32.9	obesity, psoriasis vulgaris, gonarthrosis	0	0	0	0	0	0	1	0	1	0	0	1	0	0	0	0	13	9	2020-11-30 13:55:00	0	40	1	1	1	39
105	67	0	24.5	aHT, s.p. undisplaced Dens's base fracture Typ Aderson II, s.p. merging cervical vertebral body IV+V, s.p. high tibial osteotomy, s.p. thrombosis, s.p. appendectomy	1	0	0	0	1	0	0	0	1	0	0	0	0	0	0	0	24	19	2020-11-29 16:30:00	0	21	1	1	1	38
106	54	0	24.6	non	0	0	0	0	0	0	0	0	0	0	0	0	0	0	0		17	5	2020-11-25 20:40:00	1	21	0	0
107	64	0	40.1	aHT, DM II, obesity, steatosis hepatis, depressive disorder, sleep apnoea with CPAP-therapy	1	0	0	1	1	0	0	0	0	0	0	1	0	0	1	0	18	1	2020-11-22 15:05:00	1	19	0	0
108	44	0	36	obesity												1				0	15	4	2020-11-18 00:30:00	1	2	1	1	6	1
109	49	1	45	bronchial asthma, obesity per magna, s.p. cholecystectomy	0	1	0	0	1	0	0	0	0	0	0	1	0	0	0	0	4	0	2020-11-14 18:00:00	1	6	0	0
110	69	0	31.1	amaurosis fugax left by arteriitis temporalis, OSAS, BPH, steatosis hepatis, axial hiatus hernia, s.p. incarcerated umbilical hernia, s.p. diastasis recti, degenerative spine changes, obesity	0	0	0	0	1	0	0	1	1	1	0	1	0	0	1	1	10	6	2020-11-14 11:55:00	0	15	1	1	3	14
111	50	1	23.9	aHT	1	0	0	0	0	0	0	0	0	0	0	0	0	0	0	0	18	1	2020-11-13 17:35:00	0	30	0	0
112	70	1	29.4	non	0	0	0	0	0	0	0	0	0	0	0	0	0	0	0	0	17	11	2020-11-13 15:35:00	0	17	1	1	2	17
113	35	0	40.1	obesity	0	0	0	0	0	0	0	0	0	0	0	1	0	0	0	0	4	0	2020-10-03 21:10:00	1	6	0	0
114	47	0	24.2	aHT	1	0	0	0	0	0	0	0	0	0	0	0	0	0	0	0	12	1	2020-09-27 06:50:00	1	9	0	0
115	50	0	32.5	aHT, DM II, obesity	1	0	0	1	0	0	0	0	0	0	0	1	0	0	0	0	8	1	2020-08-23 00:30:00	1	8	0	0
116	62	0	31.1	aHT, obesity	1	0	0	0	0	0	0	0	0	0	0	1	0	0	0	0	25	19	2020-05-07 15:10:00	0	114	1	1	2	113
117	39	0	27.7	sarcoidosis Typ II , s.p. cholecystectomy + cholelithiasis	0	1	0	0	1	0	0	0	0	0	0	0	0	0	0	0	11	5	2020-04-28 17:25:00	0	42	0	0
118	68	0	36.8	s.p. prostatectomy by CA, aHT, DM II, obesity Grad II	1	0	0	1	0	0	0	0	0	1	1	1	0	0	0	0	29	9	2020-04-17 14:30:00	1	25	1	1	1	24
119	64	1	22.7	hypothyroidism, CLL	0	0	0	1	0	0	0	0	0	0	1	0	0	0	1	1	12	4	2020-04-17 07:15:00	1	14	0	0
120	36	0	37	obesity, nicotine abuse	0	0	0	0	0	0	0	0	0	0	0	1	1	0	0	0	11	1	2020-04-15 17:30:00	1	18	0	0
121	56	0	29.4	OSAS, depression	0	0	0	0	0	0	0	0	0	0	0	0	0	0	1	0	25	16	2020-04-14 17:35:00	0	34	1	0	5	81
122	63	0	29.2	s.p. knee surgery, s.p. vein surgery	1	0	0	0	0	0	0	0	1	0	0	0	0	0	0	0	7	5	2020-04-09 23:50:00	1	64	0	0
123	69	0	24.2	aHT, blood-filled kidney cysts	1	0	1	0	0	0	0	0	0	0	0	0	0	0	0	0	15	13	2020-04-09 11:10:00	0	66	0	0
124	56	0	40.9	s.p. hemithyroidectomy, s.p. elevated transaminases, obesity	0	0	0	1	1	0	0	0	0	0	0	1	0	0	0	0	5	5	2020-04-06 17:10:00	1	28	0	0
125	51	0	27	non	0	0	0	0	0	0	0	0	0	0	0	0	0	0	0	0	19	18	2020-04-05 12:20:00	1	71	0	0
126	66	0	40.1	DM II, aHT, chronic renal failure, obesity	1	0	1	1	0	0	0	0	0	0	0	1	0	0	0	0	16	16	2020-03-29 21:10:00	1	28	0	0
127	64	1	29.7	hypothyroidism	0	0	0	1	0	0	0	0	0	0	0	0	0	0	0	0	7	7	2020-03-27 21:30:00	1	8	0	0
128	57	0	21.5	chronic Lyme disease, s.p. contact with toxic gases, s.p. 30% burn, s.p. hip-TEP	0	0	0	0	0	0	1	0	1	0	0	0	1	1	0	0	10	9	2020-03-26 15:00:00	1	19	0	0
129	52	0	29.4	OSAS, aHT, bipolar disorder	1	0	0	0	0	0	0	0	0	0	0	0	0	0	1	0	13	6	2020-03-25 02:30:00	1	10	0	0

## Sheet: before ECMO
Pat-Nr	ITS-ECMO (days)	renal failure	pH	HCO3-	BE	paO2	paCO2	Hb	Lactate	Creatinine	Urea	AST/GOT	ALT/GPT	INR	LDH	CRP	PCT	WBC	D-dimers	Platelets	IL-6	RR Norepi (mg/h)	RR Epi (mg/h)	MAP	FiO2	Horowitz	PEEP	AMV	V(Tid)	pmean	location outflow	size outflow (Fr)	location inflow	size inflow	problems
1	10	0	7.28	24	2	62	59	11.1	12	0.6	45	73	70	1.4	341	209	1	9.6	25	210	248	0.5	0	71	100	62	13	12	600	22	V. femoralis	21	V. jugularis	19	0
2	10	0	7.42	46.2	18.6	72.8	70.7	10.8	7	0.84	84	94	213	1	204	208	0.13	11.99	1.5	294	10.4	0	0	86	100	85.65	15.9	11.69	472	22	V. femoralis	23	V. jugularis	21	0
3	5	0	7.29	35.9	6.4	80	78.4	12.6	7	1.18	87	135	106	1.05	555	138	0.22	17.63	1.12	480		0	0	86						23	V. femoralis	21	V. jugularis	19	0
4	6	0	7.4	38.8	12	50.1	65.2	10.4	10	1.37	73	115	48	1.07	430	296	0.85	8.67	2.42	316	70.1	0.1	0	82	100	50.1	16.6	12.07	498	23	V. femoralis	21	V. jugularis	19	0
5	11	0	7.45	41	15	52	54	8.3	15	1	63	94	61	9.5	493	347	2	8.8	6	329	91	1	0	96	100	52	11	10	351	16	V. femoralis	21	V. jugularis	19	0
6	6	0	7.45	29	7	51	58	12.6	34	1.9	127	111	33	1.2	850	15	2	15.2	7	168		0.1	0	89	100	51	14	12	460	33	V. femoralis	23	V. jugularis	21	0
7	7	0	7.22	25	1	51	51	14	27	0.7	35	135	196	1.2	1336	22	1	29.5	16	160	3874	3	0	61	100	51	19	17	800	25	V. femoralis	23	V. jugularis	19	0
8	10	0	7.23	25	3	80	72	11.7	19	0.9	98	102	87	1.1	382	14	0.2	5.1	20	499	3484	2	0	72	100	80	15	8	560	24	V. femoralis	23	V. jugularis	19	0
9	0	0	7.33	28.7	1.7	33.8	54.1	13.2	15	0.93	38	164	196	1.26	1192	68.5	0.5	11.65	34.53	121	13324	0.7	0	84	98		19.6	13.46	538	26	V. femoralis	21	V. jugularis	21	blood loss
10	1	0	7.2	26.9	-2.1	82.5	69.5	9.9	8	1.63	89	35	16	1.1	1264	118	0.81	25.73	34.53	165	106	0.1	0	80	75	110	16.8	13.64	466	23	V. femoralis	23	V. jugularis	19	0
11	1	0	7.39	24	-1	99	45	13	10	0.6	22	73	127	1.1	257	43	0.06	9.6	5	410	16	0.4	0	78	100	99	18	10.4	366	28	V. femoralis	23	V. jugularis	21	0
12	14	0	7.47	40.7	14.9	94.5	56.1	10.4	8	0.8	57	95	169	0.88	274	19.7		8.55	1.28	297		0	0	73	100	236.25	12.8	11.85	406	21	V. femoralis	21	V. jugularis	19	0
13	0	0	7.29	22	-3	61	51	15.5	27	3.1	177	200	87	1.2	952	7		16	2	305	4000	2	0	60	100	61	15	11	460	26	V. femoralis	23	V. jugularis	19	0
14	8	0	7.33	35	7.2	63.4	65.8	11.7	6	1.6	121	84	38	0.94	368	171	0.92	5.85	3.97	336	251	0.2	0	79	100	63.4	18.1	6	478	24	V. femoralis	23	V. jugularis	21	0
15	5	0	7.27	27.7	-0.2	67.1	61.1	10.7	11	2.61	87	38	47	1.05	375	336	4.45	11.67	7.78	138	1302	0.2	0	105	100	67.1	15.9	12.49	624	22	V. femoralis	23	V. jugularis	21	0
16	0	0	7.3	26.5	0.6	19.6	59.2	14.9	13	0.57	13	52	36	0.87		154	0.23	5.02	1.48	157		2.2	0	68	100	19.6	12.7	10.97	532	27	V. femoralis	21	V. jugularis	19	0
17	0	0	7.22	29.1	-1.6	34	69	13.6	10	2.1	111	80	39	1.2	642	169	0.81	6.7	7	277	29	0.1	0	55	100	34	16	3	120	18	V. femoralis	23	V. jugularis	19	0
18	8	1	7.4	36.1	9.4	65.5	58	12.6	8	3.69	273	28	27	1.11	321	86.8	0.72	9.49		276		0	0	90	100	72.78	12.7	10.1	463	21	V. femoralis	23	V. jugularis	21	0
19	8	0	7.29	32.8	5.1	77.4	68.9	8.2	10	0.57	53	56	31	1.07	359	81.8	0.16	18.35	2.07	461	131	0.3	0	64	80	96.75	17.8	8.34	412	24	V. jugularis	27	V. jugularis	27	0
20	13	0	7.09	24.3	-6.1	77	80.7	9	5	0.8	42	51	44	1.33	598	392	0.62	22.23	34.53	441	191	0.3	0	87	90	85.56	19.8	7.94	318	26	V. femoralis	23	V. jugularis	21	0
21	14	0	7.13	21	-2	33	97	13.1	52	1.1	46	41	48	0.9	940	5	0.2	14	12	219	8140	3.6	0.2	52	100	33	17	8.5	482	28	V. femoralis	23	V. jugularis	19	0
22	4	0	7.08	19	-4	68	60	13	35	1.7	81	65	45	1	308	210	1	12	1	317	166	3	0.2	59	100	68	15	5	355	22	V. femoralis	23	V. jugularis	19	0
23	8	0	7.3		1	85	81	14.1	19	0.8	15	48	42	1.1	524	96	1	13.2	2	163	95	1	0	65	100	85	18	7	450	25	V. femoralis	23	V. jugularis	21	0
24	7	0	7.34	32	8	61	65	14	20	0.9	73	81	89	1.2	465	13	0.2	8.8	1	265	3093	3	0	71	100	61	14	7	456	22	V. femoralis	21	V. jugularis	19	0
25	18	0	7.35	42	16	86	75	10	24	0.8	110	29	35	1.3	175	256	0.5	11.3	1	207	22	0.4	0	65	100	86	15	9.5	525	21	V. femoralis	23	V. jugularis	21	0
26	9	0	7.27	23	5	92	69	8.6	22	0.8	112	113	49	1.2	1524	47	1.2	68	35	334	33	1	0	61	100	92	8	14	400	14	V. femoralis	21	V. jugularis	17	0
27	1	0	7.17	23	-1	57	76	14.2	27	3.1	77	472	388	1.1	1083	187	39	18	3	247	1932	1.6	0	65	100	57	15	9.2	380	24	V. femoralis	25	V. jugularis	19	0
28	5	0	7.18	22.9	-4.1	56	61	10.9	16	0.8	40	78	75	1.2	489	441	2	13.6	8	270	1699	0.3	0	64	100	56	15	6.4	320		V. femoralis	21	V. subclavia	19	0
29	3	0	7.33	24.2	-1.8	51	47	9.2	9	1.3	51	36	25	1	448	203	3	11.1	3	381	73	0.6	0	64	90	57	15	4.2	400	26	V. femoralis	21	V. femoralis	21	difficult puncture
30	2	0	7.35	27.6	1.6	38	51	12	16	0.7	18	81	73	1.1	397	19	1.09	6.6	1	200	54	0	0	68	100	38	16	6.9	430	30	V. femoralis	23	V. jugularis	21	difficult puncture
31	18	0	7.5	37	15	56	52	10.5	11	0.8	60	53	40	1.2	313	62	0.2	8	3	290		0.6	0		100	56	5	16	580	13	V. femoralis	23	V. jugularis	21	0
32	7	0	7.36	35.3	7.8	98.5	63	12.4	11	1.13	71	40	62	1.03	392	43.1	0.14	15.25	13.85	299	26.5	0	0	73	79	151.54	12.7	8.09	457	17	V. femoralis	21	V. jugularis	19	0
33	3	0	7.3	19	-5	63	56	12	17	0.8	47	45	33	1	791	13	0.38	12	1	285	325	0.6	0	84	100	63	15	8	345	23	V. femoralis	21	V. jugularis	19	0
34	7	0	7.3	30.4	2.4	71.3	62.2	12.9	9	1.09	75	32	79	0.94	273	119		6.44		219	12.2	0.1	0	70	100	89.35	11.7	7	356	16	V. femoralis	21	V. femoralis	21	0
35	6	0	7.33	21	-6	92	40	14	15	0.9	48	52	70	1.1	541	5	0.3	12.5	2	405	93	0.8	0	69	100	92	16	15	772	25	V. femoralis	23	V. jugularis	19	0
36	20	0	7.32	31	7	71	69	11	20	0.5	36	142	194	1	237	94		7	4	67	277	0.5	0	74	100	71	15	12	678	24	V. femoralis	23	V. jugularis	19	0
37	6	0	7.26	25	2	64	57	13	16	2.9	61	107	69	1.5	1193	415	3.8	8.9	7	275	174	0.9	0	71	100	64	15	6	450	22	V. femoralis	23	V. jugularis	21	0
38	1	0	7.44	28.6	3.8	50.8	44.2	8.2	15	0.87	32	72	54	0.9	360	168	0.46	7.67	0.82	258	97.3	0.1	0	113	100		15.7	9.99	466	21	V. femoralis	21	V. jugularis	17	0
39	22	0	6.92	19	-3	90	162	8.3	14	1.2	95	33	71	1	308	155	7	30	6	244	118	4.2	0	5	60	150	15	7	311	22	V. femoralis	23	V. jugularis	19	0
40	1	0	7.49	32	12	71	47	10	13	0.3	34	24	31	1.1	313	47	0.2	15.7	2	311	49	0.4	0	62	100	71	15	9	238	35	V. femoralis	21	V. jugularis	19	0
41	1	0	7.34		2	69	51	10.3	13	2.6	64	320	79	1.1	961	430	9	10	4	190	128	0.4	0	67	100	69	15	4	450	22	V. femoralis	21	V. jugularis	19	0
42	1	0	7.4	24	3	89	55	13.6	16	1.2	40	141	52	0.9	1074	67	1	9.9	2	267	48	0.1	0	69	100	89	15	7	451	22	V. femoralis	23	V. jugularis	21	0
43	10	0	7.37	24	3	82	52	13.4	16	0.6	33	32	15	1	448	305		16.8	34	275	30	0.5	0	69	100	82	10	13	540	21	V. femoralis	21	V. jugularis	19	0
44	2	0	7.24	32.6	3.3	50.7	76.1	11.6	9	1.5	69	95	33	0.99	490	102	0.08	7.28	1.63	308	13.9	0	0	127						23	V. femoralis	21	V. jugularis	19	0
45	5	0	7.27	23	1	83	89	11	20	0.9	42	49	95	1.1	339	547	2	35	2	290	1069	1	0	78	100	83	12	15	459	18	V. femoralis	21	V. jugularis	19	0
46	6	0	7.42	27	7	77	49	10.6	27	0.3	24	82	45	1.1	463	249	0.3	6.3	2	259	76	0.8	0	73	100	77	16	10	390	22	V. femoralis	23	V. jugularis	19	0
47	14	0	7.17	21	-5	75	77	10.9	19	0.8	40	34	17	1.4	440	148		17.4	8	525	36	3	0	76	100	75	11	12	334	19	V. femoralis	23	V. jugularis	17	0
48	12	0	7.41	24.6	0.1	110	38.7	8.3	16	2.24	159	35	21	1.19	406	256	2.33	11.23	6.86	164	1489	0.8	0	72	100	110	17.9	10.02	494	25	V. femoralis	23	V. jugularis	17	0
49	6	0	7.39	30	7	61	53	11.1	17	1	26	64	56	0.9	342	194	0.5	8	8	290	1133	0	0	84	100	61	15	13	540	20	V. femoralis	21	V. jugularis	19	0
50	7	0	7.13	21	-1	80	70	13.4	17	0.8	42	56	60	1.5	758	124	0.3	5.9	9	293	576	1	0	67	96	83	10	10.5	400	18	V. femoralis	23	V. jugularis	19	0
51	9	0	7.16	22	2	50	61	8.7	18	2.4	129	53	64	1.2	434	151	0.7	20	4	200	70	1.5	0	65	100	50	16	12	500	22	V. femoralis	21	V. jugularis	17	0
52	13	0	7.4	36.3	10.3	65.8	58.4	8.2	5	0.61	62	35	52	1.12	261	171	0.46	19.82	2.64	151	540	0.3	0	91	100	65.8	11	10.6	452	18	V. femoralis	21	V. jugularis	19	difficult puncture
53	26	0	7.02	27.3	-4.6	63.6	105	9	6	0.78	67	34	105	2.1	325	288	0.46	12.18	1.76	144	1212	2.2	0	59	98	64.9	7.8	10.1	424	18	V. femoralis	21	V. jugularis	19	0
54	15	0	7.24	24	1	73	69	10	21	1	113	57	26	1.3	723	34	5.7	20	3	497	421	0.6	0	65	100	73	15	14.6	542	22	V. femoralis	21	V. jugularis	19	0
55	3	0	7.51	30.4	6.9	72.3	38.5	13	11	0.51	32	34	44	1.06	431	104	0.24	7.27	0.5	213	149	0.3	0	92	90	79.45	4.9	17.63	595		V. jugularis	28	V. jugularis	28	0
56	11	0	7.33	29	6	90	65	10	15	0.7	31	30	28	1.1	309	340	0.5	12.2	1	194	71	0.5	0	81	100	90	16	13	844	23	V. femoralis	21	V. jugularis	17	0
57	14	0	7.27	30	7	79	80	10.5	11	0.9	59	45	37	1.3	320	202	0.3	8.3	2	145	66	0	0		100	79	15	8	529	21	V. femoralis	21	V. jugularis	19	0
58	15	0	7.34	37	9.2	88.5	69.4	10.4	9	0.75	84	120	120	1.04	287	47.3	0.19	12.93	1.29	308	7.8	0	0	73	100	88.59	13.9	11	610	19	V. femoralis	23	V. jugularis	21	0
59	10	0	7.31	27	4	68	51	10	17	0.7	71	28	27	0.9	312	153	0.6	25.1	2	744	844	0.2	0	72	90	76	16	8	345	22	V. femoralis	21	V. jugularis	21	0
60	26	0	7.1	33	10	67	140	8.3	7	0.4	20	27	33	1	421	251	0.2	9	5	289	15	0.5	0	56	80	84	9	3	200	19	V. femoralis	21	V. jugularis	17	0
61	12	0	7.37	24	0.3	62	56	8.2	12	0.6	94	45	30	1.2	255	14	11	8.5	5	640	88	1	0	69	100	62	16	15.4	345	32	V. femoralis	23	V. jugularis	19	0
62	1	0	7.33	26.6	0.1	52	50.2	12.5	10													0.7	0							22	V. femoralis	21	V. jugularis	17	0
63	5	0	7.3	23.1	-1	63	50	12.6	19	0.7	38	42	55	0.9	514	26		13	3	413	74	1.2	0	67	100	63	10	11	588	17	V. femoralis	21	V. jugularis	19	0
64	16	0	7.31	24	1	83	54	9.5	10	0.3	48	74	91	1.1	433	421	1	11	6	524	384	2	0	65	100	83	13	10.4	479	16	V. femoralis	21	V. jugularis	19	0
65	8	0	7.14		3	48	86	14	15	0.7	37	40	40	1.1	447	12	0.2	24.4	3	611	26	2.5	0	61	100	48	13	6	350	21	V. femoralis	23	V. jugularis	19	0
66	5	0	7.31	24	1	41	57	13.9	25	0.8	48	62	45	1	955	255	0.28	13.6	11	256	1004	3	0	55	100	41	15	7	450	24	V. femoralis	21	V. jugularis	19	0
67	15	0	7.31	35	12	78	82	10.1	10	0.6	67	42	54	1	333	33	1.7	22	8	255	12	1.6	0	76	100	78	10	11	520	25	V. femoralis	23	V. jugularis	17	0
68	4	0	7.28	24	2	47	52	14	13	1	40	50	27	1.3	927	25	0.6	11.7	35	106	47	1	0	66	100	47	14	19	550	17	V. femoralis	21	V. jugularis	19	0
69	2	0	7.43	32.2	6.6	50.6	48.1	15.5	23	0.79	30	83	64	1.05	642	113	0.39	7.75	1.06	180	68	0.5	0	100	95	56.22	14.7	10.55	598	21	V. femoralis	21	V. jugularis	19	0
70	4	0	7.3	27.6	0.1	86	56.3	13.1	10	1.56	74		144	1	656	1.1	0.14	22.32		475	1080	0	0	95	100	86	5.6	30.54	531		V. femoralis	21	V. femoralis	15	0
71	2	0	7.22	23	2	67	74	11.4	38	2.9	113	115	95	1.1	931	10	1	11.1	8	251	1623	2	0	60	100	67	15	10	505	23	V. femoralis	23	V. jugularis	19	0
72	14	0	7.26	24	-2	60	58	10.6	10	0.6	26	153	200	1	488	140		8	16	213	1177	1	0	71	100	60	15	10	600	19	V. femoralis	23	V. jugularis	19	0
73	4	0	7.2	24	3	86	75	10.8	8	0.9	34	291	250	1.3	465	135		23	35	540	100	1	0	68	100	86	14	10	596	19	V. femoralis	21	V. jugularis	19	0
74	0	0	7.1	20	-7	40	76	12.1	15	1.1	43	45	45	1.2	664	270	1	23.3	23	373	64	2	0	55	100	40	9	4.3	550	18	V. femoralis	23	V. jugularis	19	0
75	1	0	7.25		-2	59	46	14.5	16	0.8	40	55	85	1	524	10	1	11.3	23	319	17	0.4	0	69	100	59	15	12	456	24	V. femoralis	21	V. jugularis	17	0
76	9	0	7.37	24	1	87	50	11.8	29	1	52	80	56	1.1	409	17	1.1	8.1	1	282	278	0.2	0	71	90	97	15	11.4	578	19	V. femoralis	21	V. jugularis	19	0
77	17	0	7.38	28	4.7	68	54	9.2	10	0.5	58	28	52	1.2	552	172	0.2	10.7	4	493	94	0.2		81	100	68	14	14	778	18	V. femoralis	21	V. jugularis	19	0
78	6	0	7.22	24	-3	55	60			0.9	38	71	119	1.1	288	196		14.7	16	522		1	0	81	100	55	18	12	450	24	V. femoralis	23	V. jugularis	15	0
79	2	0	7.47	32	8	87	45	8.2	10	0.9	25	32	18	1.2	60	73	1.4	12	2	399	27	0.5	0	81	100	87	13	11	544	20	V. femoralis	21	V. jugularis	17	0
80	11	0	7.33	39.5	11.5	82.2	78.8	11	5	0.86	57	77	111	0.91	392	201	0.35	14.66	7.07	433	27.4	0.5	0	79	80	103.5	15.5	7.33	3	21	V. femoralis	21	V. jugularis	17	0
81	1	0	7.29	23	1	56	43	12.6	23	0.8	29	21	20	1	241	1	0.1	17	6	306	16	1.8	0	68	100	56	11	10	360	18	V. femoralis	21	V. jugularis	19	0
82	17	0	7.23	35.7	6.5	49.7	85.7	8.8	7	0.76	35	81	55	1.05	513	297	0.68	16.65	27.78	217	482	1.3	0	75	100		14	6.28	280	24	V. femoralis	23	V. jugularis	19	0
83	20	0	7.47	26	8	48	44	10	15	0.4	32	32	25	1.1	549	166	0.1	13.8	9	262	84	0	0	67	100	48	13	12	800	19	V. femoralis	23	V. jugularis	19	0
84	11	0	7.3	21	-3	60	48	12	15	0.8	48	41	77	1.2	542	10	0.1	16.8	1	513	71	1.6	0	65	100	60	17	14.6	560	26	V. femoralis	23	V. jugularis	19	0
85	7	0	7.29	32	8	43	73	11	10	0.5	31	36	48	1.2	289	29		6.7	2	207	181	0	0	55	100	43	12	10	400	18	V. femoralis	21	V. jugularis	17	0
86	13	0	7.36	24	2	72	50	9	28	1.9	114	515	118	0.9	862	506	3.4	37.8	3	378	38	1	0	69	100	72	13	14	450	19	V. femoralis	21	V. jugularis	19	0
87	1	0	7.16	34.5	2.2	62.5	102	13.5	9	1.52	55	45	75	1.04	443	211	1.05	21.25	35	289	218	2.2	0	94	100	81.17	9.8	9.82	331	17	V. femoralis	21	V. jugularis	17	0
88	10	0	7.22	24	-0.2	63	70	12.1	11	0.6	33	33	37	1.1	691	8	1	19	4	501	43	1	0	67	100	63	10	13.3	547	19	V. femoralis	21	V. jugularis	17	0
89	10	0	7.38	38	14	57	70	8.8	12	0.4	73	67	74	1	337	24	0.2	12.7	16	603	203	0	0	78	100	57	18	11.8	466	22	V. femoralis	21	V.jugularis	17	0
90	19	0	7.34	36	8.9	73.2	68.7	9.8	9	0.74	108	23	18	1.01	223	131	0.45	6.06	0.87	265	17.6	0	0	71	99.9	85.92	16.9	12.9	517	23	V. femoralis	23	V. jugularis	21	0
91	2	0	7.31	21	-3	50	51	17.3	29	2.2	99	57	51	1.1	653	20	0.6	16	3	265	39	1.6	0	55	100	50	15	12.4	876	22	V. femoralis	23	V. jugularis	21	0
92	11		6.98	19	-4	75	134	10.9	7	1.8	81	75	86	1	359	25	2.7	10	4	157	50	0	0	61	80	94	12	10	825	16	V. femoralis	21	V. jugularis	19	0
93	6	1	7.08		-5	74	92	11	8	2.9	130	83	74	1.2	916	245	17	15	4	192	62	0.6	0	86	100	74	12	8	700	15	V. femoralis	21	V. jugularis	19	0
94	6	0	7.36	24	1	66	50	11.7	20	1.3	72	40	14	1.4	548	41	3	8.9	34	234	1310	0.6	0	78	100	66	9	15	700	12	V. femoralis	21	V. jugularis	19	0
95	1	0	7.14	33.5	2.6	68	103	9.7	5	0.84	49	45	54	1.22	356	319	2.9	8.42	2.31	388	367	0.7	0	60	100	68	14.5	11.26	331	24	V. femoralis	21	V. jugularis	19	0
96	7	0	7.31	23	1	70	58	11.1	9	1.8	140	26	89	1.3	242	31	0.5	3.5	1	221	374	0	0	67	90	78	15	9	440	24	V. femoralis	21	V. jugularis	19	0
97	17	0	7.33	41.5	13.7	54.1	78.2	7.9	6	0.96	41	50	10	1.06	358	95.1	0.5	12.16	3.94	163	149	0	0	72	100	54.1	13.7	6.14	211	22	V. femoralis	21	V. jugularis	17	0
98	17	0	7.35	29	5	71	57	9.4	9	0.4	33	54	55	1.1	267	139	0.1	8.7	3	187	509	0.4	0	67	100	71	16	9	300	21	V. femoralis	21	V. jugularis	17	0
99	19	0	7.27	40.9	11.8	60.4	91.3	10.1	18	0.56		28	20	1.3	219	217	0.69	15.09	3.42	102	594	0.7	0	79	100	75.5	15.7	8.93	285	22	V. femoralis	21	V. jugularis	19	0
100	3	0	7.2	29.7	0	78.6	78.6	12.5	12	1.11	57	59	121	1.16	365	106	0.19	13.63	7.86	250		0.5	0	94	100	98.25	14.7	10.42	352	15	V. femoralis	21	V. jugularis	19	0
101	4	0	7.36	24	2	43	49	10.2	29	0.8	21	84	36	1.2	514	38	0.4	10.5	2	275	665	0.4	0	65	100	43	13	9.7	339	22	V. femoralis	21	V. jugularis	19	0
102	1	0	7.29	29.9	2.1	89.9	65	12.7	15	1.16	88	85	33	1.05	621	72.8	0.49	13.02	8.78	115	84.8	0.1	0	94	100	112.38	17	13.8	585	22	V. femoralis	23	V. jugularis	21	0
103	5	0	7.27	28.5	0.6	73.8	62.3	10.6	18	1.52	61	43	69	1.02	333	208	0.58	10.48	1.49	276	169	0.7	0	65	70	123.21	13.8	15.8	586	19	V. femoralis	21	V. jugularis	19	0
104	10	0	7.48	40.9	14.9	52.3	55.6	12.2	17	0.6	84	59	40	1.32	398	112	0.16	3.62	5.49	235	65.6	0	0	81	100	65.38	14.9	12.51	499	21	V. femoralis	23	V. jugularis	21	0
105	20	1	7.24	32.5	4.3	71.1	78.1	9.1	6	2.77	87	55	36	0.97	489	395	19	13.01	10.45	309	181	0.9	0.1	76	65.8	109.22	13	13.3	415	19	V. femoralis	21	V. jugularis	17	0
106	5	0	7.24			69	88	12	10	1.1	65	44	37	3.4	310	164	0.3	19.3	2	316	112	3	0	65	100	69	14	12	623	22	V. femoralis	21	V. jugularis	19	0
107	2	0	7.16	23	0.1	74	81	11	11	1	55	494	55	1	727	503	0.6	16.2	6	294	29	0.8	0	78	100	74	15	9	567	22	V. femoralis	23	V. jugularis	21	0
108	4	1	6.97	20	-3	67	116	8.9	11	4.7	113	52	59	1.2	282	124	4	5.8	3	67	139	2	0	61	100	67	15	6	450	25	V. femoralis	23	V. jugularis	19	0
109	1	0	7.36	24	1	84	54	12	15	0.7	21	71	32	0.9	882	240	0.7	6.8	3	170	19	0.3	0	67	100	84	15	6	400	26	V. femoralis	21	V. jugularis	17	0
110	8	0	7.47	40.6	15.2	80.8	56	8.1	13	1.38	137	135		1.16	353	30.9	1	7.83		190	49	0	0	94	60.1	133.33	16.2	10.4	498	20	V. femoralis	21	V. jugularis	17	0
111	10	0	7.41	31	5.6	106	48.7	9.9	11	0.9	57	18	17	0.96	528	92.4	0.09	14.49	1.84	329	2.5	0	0	73	65	163.08	14.6	8.16	296	28	V. femoralis	23	V. jugularis	19	difficult puncture
112	12	1	7.24	29.1	1.2	42.8	68.8	7.3	7	3.22	80	44	31	0.94	475	348	0.81	16.77	13.15	158	112	0	0.1	79	100	42.8	12.8	8.12	327	21	V. femoralis	23	V. jugularis	17	0
113	0	0	7.34	24	-3	80	50	14	9	1.2	78	123	89	1	1157	8	0.2	5	5	230	23	0.5	0	76	100	80	16	11.1	425	21	V. femoralis	21	V. jugularis	19	difficult puncture
114	1	0	7.4	25	1	67	39	12	10	1.1	42	43	47	1	370	38	0.2	12	3	588	31	0.3	0	68	100	67	17	13.3	770	22	V. femoralis	23	V. jugularis	19	0
115	1	0	7.25	21	-6	46	66	13	26	1.1	32	32	19	1.1	211	22	0.3	4.6	1	162	2235	0.8	0	57	100	46	15	9	567	22	V. femoralis	23	V. jugularis	19	0
116	19	0	7.28	25.3	-1.1	313	55.9	7.9	10	0.46	56	51	49	1.37	226	265	1.05	8.1	4.2	404	2013	0.7	0	64	70	313	14.9	11.4	481	23	V. femoralis	24	V. femoralis	24	0
117	5	0	7.34	26.3	0.7	64.6	50.6	9.3	15	0.75	24	48		1.13	286	253	1.51	6.53		375	2304	0.5	0	105	100	64.6	17.9	13.4	514	24	V. femoralis	23	V. jugularis	19	0
118	23	1	7.19		13	107	101	8	12	1.9	38	34	25	1.3	275	121	0.3	16.8	2	352	29	2.4	0	67	100	107	14	8	456	22	V. femoralis	23	V. jugularis	19	0
119	4	0	7.3	24	3	64	61	9	12	0.6	44	49	19	0.9	285	292	1	24.2	3	182	402	0.4	0	68	90	71	10	12	420	15	V. femoralis	21	V. jugularis	17	0
120	1	0	7.33		6	98	74	13	11	0.8	16	71	60	1.2	628	332		9.6	4	388	956	0.4	0	72	100	98	21	12	539	29	V. femoralis	23	V. jugularis	19	0
121	16	0	7.11	32.4	1	84.6	107	9.6	6	0.67	82		51	1.1	452	247	0.59	9.22		465		0.2	0	63	80	106.02	14.6	14.5	514	22	V. femoralis	21	V. jugularis	17	0
122	5	0	7.27	38	12	89	97	10.5	15	0.9	59	43	21	1.3	241	448		2.6	35	107	663	0.2	0	69	0.8	111	15	12	540	22	V. femoralis	23	V. jugularis	21	0
123	13	0	7.18	34.8	4.6	73.1	97.4	9.8	5	1.06	86	60	46	1.15	530	162	0.59	11.8	14.18	249	99.3	0.6	0	75						19	V. femoralis	21	V. jugularis	17	0
124	5	0	7.22	21	-4	65	67	10	19	2.1	114	77	27	1.2	2905	34	3	9.4	18	318	689	4.6	0	61	100	65	13	9	590	25	V. femoralis	23	V. jugularis	21	0
125	18	0	7.32	29	6	52	67	9.8	11	0.4	45	46	47	1.1	257	131	0.3	7.6	4	550	6	0.3	0	61	100	52	15	10	400	21	V. femoralis	21	V. jugularis	19	0
126	16	0	7.37	35	7	52	61	13	15	2.3	99	70	56	1.1	351	44	2	10	2	283	683	0.6	0	76	90	58	15	13	580	20	V. femoralis	23	V. jugularis	21	0
127	5	0	7.41	26	3	71	62	11	13	0.5	47	84	36	1	378	112	0.5	8.7	22	241	530	1	0	69	75	95	14	14	266	22	V. femoralis	21	V. jugularis	17	0
128	10	0	7.45	27	3	53	51	11	12	0.7	60	124	221	1.1	648	59		12	7	487	739	1	0	61	100	53	16	5	450	22	V. femoralis	21	V. jugularis	21	0
129	7	0	7.39	23	1	59	47	10.3	13	1.7	95	144	167	1	420	121	2	11.4	2	394	94	0.2	0	72	100	59	15	9	367	21	V. femoralis	23	V.jugularis	17	0

## Sheet: BGA
pH	average				min				max						HCO3- (mmol/L)	average				min				max
Pat-Nr	0-24h	48-72h	96-120h	216-240h	0-24h	48-72h	96-120h	216-240h	0-24h	48-72h	96-120h	216-240h			Pat-Nr	0-24h	48-72h	96-120h	216-240h	0-24h	48-72h	96-120h	216-240h	0-24h	48-72h	96-120h	216-240h
1	7.45	7.5	7.46	7.47	7.41	7.44	7.43	7.42	7.49	7.54	7.5	7.55			1	25.22	31.83	37.26	36.57	22	29.2	36	32.4	27.9	34.9	39.8	38.9
2	7.52	7.48	7.47	7.47	7.47	7.44	7.43	7.4	7.56	7.52	7.53	7.59			2	41.99	34.36	33.81	31.98	38.7	32.5	31.7	29.9	44.4	35.8	35.5	34
3	7.49	7.43	7.38	7.28	7.4	7.36	7.24	7.19	7.56	7.49	7.42	7.36			3	33.99	28.77	25.45	21.47	28.2	27.4	24.3	18.3	37.1	30.7	27.9	23.9
4	7.49	7.45	7.43	7.4	7.42	7.4	7.4	7.37	7.57	7.54	7.45	7.46			4	39.71	35.6	30.59	28.12	36.8	33	29.5	26.5	42.9	37.2	31.7	30.4
5	7.55	7.47	7.41	7.42	7.43	7.43	7.37	7.36	7.7	7.51	7.46	7.45			5	37.92	32.45	27.62	25.89	30.7	29.9	26.5	23.1	41.4	34.2	29.3	27.8
6	7.57	7.47	7.45	7.49	7.5	7.44	7.39	7.43	7.67	7.5	7.5	7.56			6	36.58	31.72	31.58	30.61	34.4	30.3	26.8	29.1	40	32.6	35.1	31.9
7	7.54	7.51	7.47	7.44	7.52	7.49	7.45	7.35	7.56	7.54	7.53	7.53			7	28.13	29.29	30.97	27.49	25.3	28.4	30	24.1	30.8	31	33	29.1
8	7.45	7.43	7.4	7.49	7.4	7.36	7.37	7.43	7.51	7.49	7.45	7.56			8	30.46	33.14	32.4	33.21	27.9	32.3	29.4	28	32.7	34.8	34.6	37.4
9	7.44	7.42	7.38	7.46	7.22	7.35	7.31	7.45	7.51	7.49	7.45	7.48			9	27.79	30.71	34.02	38.6	25.1	29.7	32.5	37.3	30.7	31.8	35.4	41
10	7.36	7.39	7.36	7.42	7.27	7.34	7.32	7.38	7.48	7.49	7.43	7.5			10	28.27	28.83	33.03	36	26.7	27.7	30.8	34.6	30	30.5	37	37.4
11	7.46	7.48	7.46	7.44	7.29	7.46	7.42	7.4	7.59	7.49	7.49	7.49			11	28.64	33.46	32.54	33.69	25.2	32.5	31.5	31.4	32.3	34.7	33.7	35.7
12	7.43	7.49	7.45	7.48	7.36	7.44	7.41	7.45	7.49	7.58	7.48	7.51			12	38.26	33.26	28.83	29.58	27.5	29.5	25.6	27.4	41.2	35.1	31.3	31.3
13	7.4	7.41	7.44	7.44	7.36	7.35	7.43	7.4	7.45	7.46	7.5	7.5			13	23.79	26.33	27.71	31.79	19.9	24.7	25.3	29.9	27	28.4	29.9	33.1
14	7.39	7.42	7.44	7.33	7.3	7.35	7.39	7.24	7.46	7.48	7.48	7.46			14	33.14	30.82	33.9	22.35	31.1	28.7	32.3	20	35.7	33.1	35.5	23.6
15	7.38	7.33	7.38	7.49	7.29	7.28	7.31	7.45	7.47	7.41	7.47	7.52			15	30.65	28.66	28.64	38	28	25.4	20.6	35.9	33.3	32.7	31.4	40.6
16	7.41	7.52	7.43	7.41	7.31	7.47	7.37	7.35	7.48	7.56	7.51	7.45			16	27.65	33.14	28.24	26.98	21.1	28.2	26.6	26	32.9	36.8	29.6	29.2
17	7.4	7.43	7.42	7.44	7.35	7.39	7.34	7.38	7.45	7.5	7.45	7.48			17	28	31.06	31.2	30.78	23.8	28.7	29.5	28.6	31.1	32.4	32.2	31.9
18	7.45	7.42	7.44	7.44	7.36	7.4	7.43	7.4	7.48	7.43	7.45	7.52			18	34.28	28.71	29.34	28.17	32.5	27.8	28.2	25.9	36	29.4	30.2	31.3
19	7.44	7.46	7.49	7.42	7.3	7.43	7.48	7.4	7.55	7.47	7.51	7.43			19	36.9	44.13	43.29	33.88	33.2	40.4	39.9	33.5	40.5	47	46.4	34.5
20	7.33	7.51	7.52	7.45	7.19	7.49	7.45	7.4	7.42	7.55	7.57	7.56			20	26.99	35.36	35.76	37.55	22.7	32.7	32.6	35.5	31.1	38.3	38.3	39.2
21	7.5	7.46	7.45	7.41	7.48	7.39	7.42	7.38	7.54	7.53	7.49	7.45			21	33.81	32.49	28.45	32.23	28.8	28.6	27.4	28.7	37.8	34.4	29.8	33.7
22	7.45	7.46	7.46	7.49	7.27	7.33	7.42	7.47	7.52	7.53	7.51	7.52			22	28.5	31.84	29.95	36.71	24.5	26.2	28.3	33.7	31.3	34.9	31.9	38.7
23	7.46	7.41	7.41	7.37	7.41	7.36	7.37	7.28	7.51	7.47	7.42	7.45			23	30.75	29.56	27.35	28	25.5	27.5	25.6	25.5	34.7	32	29.1	30.3
24	7.46	7.44	7.5	7.41	7.39	7.36	7.47	7.32	7.53	7.51	7.52	7.43			24	32.85	35.89	35.77	27.08	30.2	30.5	34.1	26.1	35.7	38.7	38	28.9
25	7.51	7.43	7.37	7.43	7.44	7.36	7.32	7.37	7.59	7.52	7.51	7.54			25	33.84	28.42	25.1	27.54	32	26.8	23.7	24.7	35.8	30.2	32.1	31.1
26	7.5	7.5	7.51	7.49	7.43	7.46	7.5	7.44	7.62	7.57	7.51	7.54			26	34.22	41.07	37.82	32.7	30.7	39.8	36.8	30.7	38.7	42.4	39.3	34.8
27	7.38	7.49	7.45		7.29	7.44	7.4		7.44	7.55	7.53				27	28.95	31.63	34.62		24.5	28.5	31.7		32.5	34.4	36.3
28	7.4	7.42	7.43	7.44	7.37	7.37	7.4	7.38	7.49	7.53	7.51	7.5			28	26.45	32.34	33.3	32.13	23.2	30.5	32	30.8	29.2	33.3	35.2	34.6
29	7.42	7.47	7.51	7.48	7.36	7.44	7.46	7.46	7.49	7.51	7.56	7.51			29	25.93	34.64	35.24	28.63	21.6	31.5	34.2	26.8	31.8	38	36.3	30.2
30	7.44	7.41	7.45	7.47	7.36	7.33	7.39	7.52	7.49	7.46	7.52	7.57			30	31.44	36.95	38.27	38.17	28.8	35.2	36.2	25	34.3	38.3	40.4	41.7
31	7.52	7.45	7.42	7.46	7.4	7.37	7.35	7.41	7.66	7.49	7.48	7.49			31	39.05	33.1	31.77	32.23	34.2	31.3	30	30.3	44.5	34.5	33.1	34.2
32	7.46	7.48	7.49	7.46	7.38	7.42	7.44	7.41	7.53	7.52	7.56	7.52			32	37.71	38.82	40.71	32.81	34.1	36.2	38.8	27	42.2	40.5	43.3	34.6
33	7.43	7.47	7.44	7.47	7.36	7.41	7.41	7.45	7.46	7.5	7.46	7.48			33	28.99	32.73	31.01	33.53	24.8	31.7	28.4	32.2	31.9	34	33.4	34.8
34	7.44	7.5	7.47	7.49	7.37	7.45	7.44	7.45	7.52	7.54	7.54	7.53			34	29.1	27.92	27.87	31.88	26.8	26.7	26.6	31	30.9	28.9	29.3	33.4
35	7.45	7.47	7.46	7.44	7.37	7.44	7.43	7.38	7.51	7.49	7.5	7.5			35	27.53	32.93	37.41	36.38	23	31.4	33.5	34.5	31.9	35.5	41.1	38.4
36	7.56	7.46	7.48	7.46	7.5	7.44	7.48	7.4	7.61	7.5	7.48	7.5			36	38.25	32.19	37.4	37.21	34	30	35.1	34.8	42.9	34.3	39.3	40.4
37	7.41	7.43	7.47	7.38	7.34	7.38	7.43	7.35	7.54	7.49	7.52	7.45			37	24.22	24.28	25.38	26.12	20	23.6	23.9	23.8	28	26.7	26.7	27.5
38	7.5	7.44	7.46	7.44	7.45	7.39	7.42	7.41	7.59	7.49	7.54	7.48			38	30	33.63	29.6	34.34	26.5	31.7	28.2	31.1	33.3	36.3	32	37.8
39	7.47	7.42	7.36	7.46	7.34	7.36	7.29	7.4	7.54	7.5	7.43	7.6			39	30.69	34.27	27.82	31.92	26.1	32.8	26.5	18.3	34.1	35.6	29.1	34.6
40	7.54	7.55	7.45	7.49	7.35	7.53	7.4	7.43	7.69	7.58	7.61	7.55			40	31.55	33.53	30.75	31.83	22.6	32.4	28.7	29.2	37.3	35.6	32.2	33.1
41	7.43	7.4	7.45	7.43	7.4	7.31	7.4	7.38	7.47	7.45	7.5	7.54			41	27.66	27.4	27.97	31.19	25.4	25.9	26.1	30	29.9	28.3	29	32.3
42	7.49	7.45	7.45	7.45	7.42	7.38	7.36	7.35	7.57	7.51	7.52	7.51			42	33.29	34.76	35.54	34.11	30.1	26.4	32.3	33.2	36.1	36.3	38.2	35.4
43	7.46	7.48	7.52	7.48	7.38	7.41	7.47	7.4	7.58	7.54	7.57	7.58			43	29.66	36.91	42.83	37.72	27.2	35.4	41.6	35.2	31.8	38.5	46.3	40.2
44	7.45	7.4	7.45	7.4	7.39	7.37	7.4	7.34	7.54	7.46	7.5	7.47			44	30.44	33.31	33.06	30.52	27.2	31.4	30.2	29.3	33	35.9	35.7	33.4
45	7.48	7.47	7.49	7.42	7.36	7.42	7.44	7.35	7.6	7.52	7.54	7.54			45	32.89	32.7	33.78	32.95	29.5	30.9	31.4	28.7	35.2	34.1	37.4	37.7
46	7.47	7.44	7.47	7.43	7.36	7.41	7.41	7.39	7.61	7.52	7.52	7.49			46	32.74	37.77	34.88	36.8	28.5	33	33.6	35.5	36.5	39.9	36.3	38.1
47	7.44	7.47	7.51	7.48	7.39	7.47	7.5	7.44	7.53	7.48	7.51	7.55			47	30.19	38.06	36.52	31	26.1	37.1	34.2	28.6	35.1	38.6	38	33.1
48	7.41	7.42	7.4	7.35	7.33	7.37	7.36	7.31	7.44	7.45	7.42	7.41			48	29.32	29.93	30.19	28.02	23.3	29.3	28.9	26.8	40.8	31.2	31.9	29.6
49	7.52	7.48	7.47	7.39	7.48	7.44	7.45	7.33	7.55	7.5	7.49	7.43			49	30.51	31.85	30.46	25.68	29.6	30.2	28	22	31.8	34.3	32.8	27.4
50	7.45	7.44	7.44	7.49	7.4	7.4	7.4	7.37	7.5	7.5	7.49	7.55			50	28.39	29.44	32.92	27.81	24	27.3	31.7	23.2	31.5	31.5	34.9	31.3
51	7.42	7.42	7.47	7.38	7.31	7.38	7.39	7.31	7.49	7.47	7.54	7.41			51	20.03	25.6	28.24	26.93	16.9	22.3	27.4	25.3	22.2	27.8	29.2	28.5
52	7.46	7.45	7.47	7.47	7.37	7.42	7.43	7.36	7.53	7.49	7.49	7.64			52	35.41	37.54	38.16	33.5	24.2	36.6	36.8	31	38.5	39.9	39.4	36.2
53	7.3	7.36	7.4	7.39	7.06	7.32	7.37	7.37	7.41	7.41	7.46	7.45			53	26.18	25.89	27.59	29.33	24.7	24.4	26.4	28	28.5	26.7	28.9	31.3
54	7.49	7.47	7.47	7.42	7.41	7.45	7.42	7.36	7.56	7.54	7.52	7.49			54	31.46	33.72	33.89	30.83	27.3	31.1	32.2	29.5	33.7	36.3	35.2	32.9
55	7.48	7.47	7.47	7.44	7.43	7.44	7.39	7.41	7.53	7.5	7.54	7.46			55	29.8	27.56	30.87	34	27.7	25.7	28.7	32.6	31.7	29	33.1	36
56	7.49	7.46	7.47	7.44	7.43	7.42	7.42	7.43	7.53	7.5	7.5	7.45			56	35.29	35.79	34.98	40.61	32.2	34	29.4	39.5	37.1	37.1	37.5	42.3
57	7.62	7.45	7.4	7.48	7.57	7.4	7.35	7.42	7.7	7.49	7.44	7.54			57	34.05	25.9	25.16	24.67	30.3	23.6	23	23.4	36.3	27.5	28.1	26.2
58	7.41	7.42	7.46	7.47	7.35	7.37	7.4	7.45	7.49	7.47	7.52	7.52			58	37.39	35.43	35.38	34.55	35.2	33.4	33.1	32.9	41.5	36.8	37	36.8
59	7.53	7.49	7.42	7.47	7.33	7.45	7.38	7.39	7.59	7.51	7.5	7.51			59	36.21	30.51	30.49	29.48	33.2	27.5	26.3	28.8	40.3	33	41	30.5
60	7.49	7.39	7.42	7.45	7.31	7.34	7.35	7.37	7.6	7.48	7.48	7.53			60	36.85	30.48	30.48	29.7	28.2	28.3	27.8	27.4	41.2	32.4	33.2	32.5
61	7.46	7.44	7.45	7.44	7.4	7.41	7.42	7.4	7.59	7.49	7.51	7.5			61	33.49	34.38	30.68	31.9	31.9	33	28.1	29.7	35.5	37.1	33.2	34.6
62	7.41	7.43	7.44	7.42	7.32	7.41	7.41	7.36	7.47	7.45	7.49	7.46			62	26.75	32.05	30.38	28.88	23.8	29.9	29.7	27.1	29	33.7	31.4	31.1
63	7.47	7.43	7.43	7.42	7.34	7.35	7.38	7.37	7.58	7.48	7.49	7.45			63	25.94	26.93	28.51	27.64	23.4	21.4	26.5	25.3	28.7	29.9	31	29.3
64	7.47	7.44	7.43	7.42	7.4	7.41	7.4	7.38	7.52	7.51	7.5	7.49			64	24.78	23.88	26.21	27.98	22.3	23	23.7	27	27.5	25.5	29	30
65	7.51	7.42	7.47	7.46	7.45	7.4	7.43	7.44	7.56	7.44	7.53	7.48			65	29.24	28.66	31.85	32.01	25.2	24.3	29.9	30	31.4	31.5	33.5	33.1
66	7.45	7.47	7.48	7.36	7.27	7.43	7.43	7.31	7.64	7.52	7.53	7.42			66	26.67	30.34	30.38	24.86	23.8	28.5	28.7	23.4	29	32.8	33.1	26.3
67	7.56	7.5	7.51	7.51	7.5	7.46	7.48	7.45	7.66	7.57	7.59	7.64			67	38.51	33.61	40.19	38.33	37.4	32.1	36.6	35.1	39.9	36	42.9	40.3
68	7.43	7.49	7.48	7.48	7.32	7.44	7.44	7.42	7.55	7.54	7.59	7.53			68	27.95	35.88	36.05	35.8	23	33	33.5	34.3	34.2	38.1	37.8	37.3
69	7.55	7.49	7.45	7.46	7.39	7.46	7.43	7.4	7.62	7.51	7.48	7.48			69	32.3	32.47	33.44	30.72	27.8	29.4	30.9	28.1	36.7	34.8	36.9	32.3
70	7.37	7.44	7.47		7.17	7.4	7.43		7.5	7.49	7.58				70	25.23	28.57	29.54		15.6	26.4	27.6		28.7	30.2	31.5
71	7.45	7.49	7.46	7.37	7.42	7.46	7.44	7.29	7.51	7.55	7.47	7.43			71	27.08	31.68	33.81	27.93	22.8	27.2	30.4	26.7	31.8	35.6	36.5	29.1
72	7.44	7.46	7.43	7.46	7.41	7.43	7.33	7.42	7.47	7.51	7.5	7.56			72	26.24	30.51	33.76	33.84	23.6	29.4	30	32.5	28.5	31.4	37.3	35.2
73	7.46	7.47	7.48	7.49	7.4	7.4	7.45	7.37	7.55	7.53	7.56	7.56			73	30.69	35.06	35.37	37.71	26.3	33.5	33.1	35.2	33.6	36.8	37	40.2
74	7.43	7.44	7.42	7.43	7.33	7.4	7.4	7.38	7.5	7.47	7.46	7.45			74	24.77	30.35	31.27	27.23	20.8	28.1	30.2	24.8	28.5	32.1	32.7	29.3
75	7.49	7.48	7.43	7.43	7.43	7.38	7.38	7.4	7.57	7.52	7.54	7.46			75	29.98	34.31	29.83	30.15	28.2	31.5	26.7	28.1	32.1	36.4	33.8	32
76	7.57	7.45	7.43	7.44	7.55	7.41	7.38	7.42	7.62	7.51	7.45	7.46			76	30.96	30.74	31.77	31.53	28.3	28.8	29.9	29.6	33.3	32.9	33.5	33.1
77	7.42	7.46	7.42	7.46	7.38	7.41	7.35	7.4	7.53	7.51	7.47	7.54			77	29.5	33.78	33.67	38.64	26.9	32.5	32.8	37	31.9	34.8	35.9	41.1
78	7.45	7.47	7.46	7.44	7.44	7.43	7.44	7.41	7.46	7.51	7.49	7.48			78	28.12	30.57	30.41	33.61	25.2	28.1	27.6	29.6	31.4	32.5	31.9	35.5
79	7.55	7.5	7.44	7.46	7.43	7.47	7.4	7.43	7.66	7.53	7.47	7.51			79	36.25	38.02	33.87	34.62	32.5	34.1	31.8	33.4	40.4	41.7	36	36.9
80	7.53	7.48	7.41	7.48	7.3	7.43	7.34	7.45	7.67	7.58	7.44	7.51			80	38.08	37.72	36.27	36.99	32.3	35.8	32.7	32.3	40.9	39.9	38.7	39.4
81	7.39	7.41	7.48	7.43	7.32	7.34	7.44	7.41	7.46	7.48	7.53	7.47			81	19.33	26.18	35.15	28.85	15.1	23	34.2	28.1	23.4	27.6	36.2	30.1
82	7.42	7.43	7.45	7.43	7.07	7.39	7.42	7.36	7.52	7.46	7.48	7.49			82	34.24	32.84	34.31	32.22	30.8	30.9	32.2	29.9	37.1	34.3	35.8	34
83	7.54	7.46	7.5	7.46	7.41	7.42	7.47	7.44	7.63	7.53	7.6	7.48			83	33.78	27.34	27.45	31.65	23.8	25.3	26.1	28.6	37.8	31.3	30.7	34.5
84	7.47	7.47	7.43	7.43	7.43	7.42	7.4	7.32	7.52	7.52	7.46	7.48			84	23.77	32.3	29.98	29.18	18.6	29.8	28.1	26.6	28.3	36	32.7	31.5
85	7.48	7.41	7.38	7.41	7.39	7.36	7.36	7.38	7.58	7.47	7.43	7.47			85	28.43	30.96	30.73	25.69	25.2	29.2	26.7	24.2	31.8	34.3	34.8	28.1
86	7.48	7.36	7.36	7.42	7.38	7.33	7.33	7.39	7.63	7.42	7.44	7.5			86	27.57	25.39	26.05	23.46	25.9	23.6	23.4	21.9	29.7	27.7	28.4	25.8
87	7.47	7.44	7.41	7.42	7.19	7.4	7.39	7.37	7.59	7.51	7.47	7.47			87	34.26	29.3	26.2	30.02	28.3	26.7	25.2	27.3	37.6	31.6	28.1	34.8
88	7.45	7.42	7.47	7.4	7.37	7.34	7.39	7.36	7.53	7.5	7.55	7.43			88	29.7	36.04	36.98	30.76	25.6	32.3	32.9	27.8	32.3	39.8	40.3	33.6
89	7.47	7.49	7.47	7.45	7.41	7.46	7.43	7.36	7.59	7.59	7.53	7.51			89	34.61	34.87	32.84	34.68	32.9	30.7	30.7	32	37.5	38.8	36.9	37.8
90	7.45	7.5	7.47	7.47	7.34	7.45	7.38	7.43	7.6	7.53	7.53	7.54			90	34.79	38.46	32.8	28.08	31	34.2	29.3	24.3	39	40.4	36.5	31.3
91	7.42	7.42	7.46	7.4	7.36	7.37	7.44	7.36	7.52	7.46	7.53	7.53			91	24.05	29.27	30.76	23.94	20.5	28	28.7	21.7	30.2	30.8	32.6	26.4
92	7.47	7.41	7.43	7.44	7.41	7.36	7.38	7.38	7.58	7.46	7.47	7.49			92	31.84	26.83	24.39	28.11	27.9	23.4	21.6	26.2	35.6	29.8	27.6	29.2
93	7.39	7.38	7.35		7.32	7.31	7.25		7.48	7.45	7.42				93	26.08	27.87	23.82		23.7	25.6	20.2		27.5	30.5	27.2
94	7.43	7.46	7.48	7.33	7.38	7.42	7.45	7.26	7.5	7.49	7.53	7.4			94	24.31	27.69	31.45	17.95	21.9	24.4	29.5	13.5	26.7	30.5	35.5	23.2
95	7.46	7.44	7.43	7.42	7.34	7.4	7.39	7.37	7.59	7.5	7.49	7.46			95	33.22	34.54	36.48	31.82	30.6	32.6	32.8	29.3	35.2	36.5	39.4	34.6
96	7.54	7.42	7.32	7.42	7.46	7.35	7.26	7.35	7.68	7.51	7.38	7.46			96	29.38	28.37	23.94	20.81	26.3	26	20.6	18.1	32.8	30	26.5	22.3
97	7.5	7.43	7.42	7.43	7.25	7.4	7.4	7.39	7.6	7.48	7.44	7.48			97	36.78	34.51	30.51	27.44	34.3	33.2	28.7	26.7	40.2	35.5	33.2	28.7
98	7.55	7.46	7.48	7.48	7.5	7.41	7.43	7.43	7.59	7.5	7.52	7.52			98	34.96	29.7	29.28	30.92	30	27.7	26.3	27.6	36.7	31.9	31.8	33.8
99	7.5	7.46	7.47	7.52	7.41	7.4	7.41	7.46	7.58	7.5	7.55	7.62			99	38.48	35.92	37.3	39.11	35.7	34.2	34.8	37.3	41.2	37.5	38.8	42.7
100	7.48	7.47	7.46	7.46	7.47	7.43	7.44	7.41	7.49	7.54	7.55	7.55			100	30.79	31.45	29.91	31.55	27.3	31	25.7	28.6	32.9	32	31.1	35
101	7.47	7.51	7.47	7.41	7.27	7.44	7.41	7.33	7.57	7.54	7.53	7.53			101	27.47	32.6	30.19	27.3	23.4	28.8	27.7	25	31.4	34.2	32.2	28.8
102	7.4	7.48	7.45	7.43	7.23	7.44	7.35	7.36	7.52	7.53	7.62	7.58			102	28.76	33.8	33.68	30.67	25.8	30.5	32.2	27.9	31	37.3	36.4	33.2
103	7.39	7.4	7.45	7.48	7.24	7.35	7.38	7.43	7.44	7.46	7.54	7.61			103	27.13	31.62	37.78	32.32	23.9	29.3	32.7	30.8	29.5	34.6	40.4	34
104	7.53	7.48	7.44	7.49	7.45	7.39	7.41	7.45	7.64	7.53	7.48	7.53			104	36.82	34.43	33.21	31.06	33.1	32.1	30.1	28.7	42.5	36.1	35.3	32.5
105	7.36	7.36	7.42	7.39	7.27	7.32	7.37	7.32	7.5	7.45	7.47	7.42			105	29.05	25.8	24.46	27.31	26.5	24	23.4	25.1	33.8	27.8	26	28.7
106	7.48	7.47	7.48	7.49	7.4	7.39	7.43	7.39	7.6	7.54	7.55	7.59			106	32.88	32.73	36.55	35.13	29.9	29.6	31.4	33	37.2	35.9	39.6	36.7
107	7.52	7.46	7.46	7.43	7.43	7.4	7.43	7.38	7.57	7.55	7.52	7.54			107	27.24	26.41	25.61	27.92	24.9	25.3	24.5	26.5	30.7	27.9	27.7	29.6
108	7.46				7.42				7.49						108	21.93				20.7				24.2
109	7.51	7.52	7.44	7.45	7.41	7.48	7.35	7.39	7.59	7.57	7.53	7.48			109	26.61	33.07	27.47	27.09	24	31.3	24.9	25.4	29.7	34.7	31.8	28.5
110	7.51	7.44	7.51	7.47	7.43	7.38	7.4	7.42	7.62	7.48	7.59	7.56			110	40	37.3	41.82	29.71	34.3	34	35	25.1	44.7	40.7	44.6	32.9
111	7.45	7.5	7.44	7.49	7.33	7.45	7.38	7.39	7.59	7.56	7.5	7.61			111	30.94	34.79	31.74	35.58	27.8	31	28	33.1	32.9	37.6	35	38.9
112	7.34	7.43	7.43	7.33	7.2	7.35	7.37	7.25	7.47	7.47	7.51	7.38			112	24.83	30.17	24.65	24.68	21.3	27.6	20.4	21.9	28	32.6	27.6	28.1
113	7.5	7.47	7.45	7.43	7.42	7.41	7.41	7.38	7.63	7.55	7.48	7.46			113	25.71	28.05	25.81	29.54	21.5	26.6	24.5	28	28.9	30.5	28.5	30.8
114	7.43	7.45	7.46	7.46	7.38	7.42	7.4	7.43	7.48	7.47	7.51	7.54			114	24.46	23.86	25.62	25.23	22.6	23.2	24.2	23.7	26.8	25.3	27.9	27.8
115	7.33	7.54	7.49	7.45	7.28	7.49	7.46	7.42	7.37	7.6	7.51	7.49			115	23.34	29.88	30.04	26.99	17.5	28.8	28.8	25.1	28.1	32.1	32.6	28.2
116	7.35	7.37	7.36	7.36	7.25	7.32	7.33	7.34	7.51	7.41	7.43	7.41			116	25.04	21.56	20.64	21.13	23.2	20.3	19.7	20.1	26.4	23.2	22.4	22.6
117	7.43	7.39	7.48	7.42	7.31	7.36	7.44	7.39	7.51	7.43	7.51	7.44			117	25.5	26.13	28.79	32.21	22.2	24.2	26.5	31.1	28	28	31.6	35
118	7.45	7.38	7.28	7.39	7.37	7.32	7.2	7.33	7.62	7.45	7.35	7.47			118	31.45	25.9	22.75	23.8	30.7	25.5	22.1	17.3	32.9	26.8	24.1	25.3
119	7.47	7.5	7.48	7.47	7.4	7.45	7.43	7.41	7.54	7.59	7.55	7.56			119	25.43	30.89	27.35	29.58	23.8	29.3	25.9	27.2	28.3	32.5	29.6	31.7
120	7.48	7.45	7.48	7.41	7.36	7.38	7.37	7.33	7.56	7.5	7.54	7.46			120	26.75	27.68	27.5	26.18	26.7	27.3	26	23.5	26.8	28	29	29.2
121	7.39	7.44	7.43	7.38	7.18	7.41	7.4	7.35	7.44	7.52	7.52	7.41			121	26.87	26.53	25.66	25.92	25.7	25.4	25	25.5	29.7	27.6	27	26.5
122	7.55	7.4	7.42	7.49	7.46	7.37	7.34	7.4	7.61	7.5	7.49	7.56			122	39.11	28.16	28.9	31.93	33.8	26.7	25.6	29.5	43.5	32.4	31.6	34.9
123	7.44	7.41	7.45	7.47	7.27	7.38	7.4	7.43	7.53	7.48	7.51	7.53			123	35.98	33.41	29.02	30.74	32.3	30.2	26.2	27.7	40.4	35.8	32.1	33.2
124	7.44	7.42	7.47	7.42	7.39	7.38	7.43	7.36	7.52	7.52	7.53	7.47			124	26.22	28.89	33.22	28.03	21.5	26.8	31.1	26.1	30.2	32.6	36.8	30.4
125	7.44	7.43	7.39	7.45	7.37	7.38	7.34	7.4	7.56	7.52	7.5	7.51			125	32.59	28.82	30.06	29.65	30.2	27.3	28.8	27	36.3	31.2	32.2	31.9
126	7.53	7.48	7.47	7.42	7.48	7.43	7.43	7.35	7.58	7.57	7.55	7.44			126	30.59	32.04	28.2	22.33	27.8	29.7	26.2	20.9	32.8	34.6	30.9	25.7
127	7.53	7.47	7.46	7.41	7.44	7.43	7.4	7.24	7.63	7.5	7.54	7.5			127	31.42	29.07	29.95	33.87	28.7	27.5	20.2	32.3	34.6	31.1	33	35.4
128	7.5	7.46	7.49	7.47	7.43	7.39	7.43	7.42	7.61	7.51	7.54	7.55			128	29.58	30.39	33.59	32.12	27.5	29.5	30.8	30.2	31.8	32	35.7	34.2
129	7.48	7.4	7.4	7.4	7.43	7.33	7.35	7.3	7.57	7.42	7.44	7.47			129	26.68	28.12	27.79	28.94	25	26.6	26.6	26.9	28.8	30	30.1	30.9
BE (mmol/L)	average				min				max						Cl- (mmol/L)	average				min				max
Pat-Nr	0-24h	48-72h	96-120h	216-240h	0-24h	48-72h	96-120h	216-240h	0-24h	48-72h	96-120h	216-240h			Pat-Nr	0-24h	48-72h	96-120h	216-240h	0-24h	48-72h	96-120h	216-240h	0-24h	48-72h	96-120h	216-240h
1	1.51	7.93	11.92	11.44	-1.9	5.2	10.8	9.1	4.4	10.7	13.8	12.7			1	108.45	110.56	103.38	101.6	107	108	102	100	112	113	104	107
2	16.9	9.7	9.2	7.23	13.5	8.3	7.2	5.7	18.8	11.1	11.3	8.9			2	96.5	104.78	101.78	104	94	103	100	102	99	106	107	106
3	9.26	3.98	0.26	-5.08	0.2	2.2	-1.8	-7.7	11.8	4.9	2.4	-2.3			3	112.62	120.55	121	119.71	110	119	120	118	116	122	122	122
4	14.92	10.34	5.69	2.87	13	8.5	4.4	1.5	17	11.4	6.8	4.4			4	106.33	113.64	117.8	120.2	104	112	117	119	108	116	119	123
5	14.25	7.94	2.68	1.43	5.7	5.5	1.3	0	19.1	9	3.7	3			5	102.15	110.25	115.11	110	97	107	113	108	112	113	117	112
6	12.79	7.27	6.94	6.53	10.4	6.6	3.5	5.7	15.2	8.2	8.7	7.3			6	107.92	105	103.25	103.79	105	102	100	100	112	107	113	106
7	5.49	5.78	6.31	3.15	3.1	4.2	5	-1.6	7.3	7	7.8	6.2			7	102.71	110.25	109.82	115.21	96	108	107	114	107	111	111	118
8	5.84	7.82	6.71	9	3.4	6.8	3.5	3.3	7.5	8.7	8.5	13.8			8	108.44	108.6	107.58	101.46	106	107	105	97	112	110	112	106
9	2.87	5.68	7.85	13.24	0.2	3.7	6.4	11.9	4.9	7.3	9.4	14.9			9	106.15	109.89	111.08	107.57	104	107	109	105	109	111	113	110
10	2.37	3.28	6.56	10.29	0	1.9	4.5	9.5	4.4	4.7	10.2	11.3			10	107.13	112.33	108.62	100.8	106	111	104	99	111	114	110	102
11	3.91	8.73	7.72	8.43	2.2	8.1	6.1	5.8	5.8	9.7	8.6	9.8			11	108.21	102.22	105	98.8	104	101	103	98	111	104	107	100
12	12.03	8.91	4.51	5.6	3.1	7.1	1.8	3.8	14.1	10.3	5.7	7			12	102.21	103	109.08	104.25	98	101	107	103	118	106	112	106
13	-0.74	1.59	3.31	6.72	-4.1	-0.1	0.9	5.5	2.1	3	5.2	8			13	111.93	119.3	114.22	107.18	106	118	112	106	118	122	117	110
14	6.83	5.61	8.54	-3.64	4.1	2.4	6.6	-5.9	8.8	7.5	10.7	-1.4			14	111.19	110.23	101.8	103.23	110	108	99	102	112	112	105	104
15	4.68	2.14	2.8	12.84	2.3	-1.1	-3.8	10.9	6.4	5.9	6	14.3			15	101.85	104.35	107.35	96.44	100	101	105	95	106	110	112	98
16	2.94	9.46	3.56	2.06	-3	4.7	1.9	0.2	7.8	13.3	5.1	3.5			16	100	107.92	112.6	107.36	94	105	108	106	105	113	114	110
17	2.72	5.78	5.55	5.78	0.2	4.5	4.1	3.2	5.1	6.5	6.8	7.3			17	108.53	112.08	107.64	115.45	106	110	106	113	112	115	110	120
18	8.89	3.61	4.54	3.74	7.8	3.1	3.4	1.5	9.8	4.5	5.1	6.5			18	102.79	107.6	102.88	109.07	101	106	101	106	105	109	105	111
19	11.46	17.86	17.95	8.3	8.1	14.6	15	7.4	14.5	20.3	20.8	8.6			19	106.79	88.1	86.83	100.67	102	85	84	99	110	94	91	102
20	0.43	11.1	11.69	12.2	-5.6	8.6	9.8	11	5.1	13.1	13.2	14.5			20	115.65	110.09	106.6	100.67	114	106	105	99	119	113	109	102
21	9.7	7.68	4.05	6.63	5.1	5.2	2.9	3.9	12.8	8.7	4.7	7.7			21	106.5	104.09	104.09	103.7	105	102	103	103	109	107	105	108
22	4.09	7.21	5.62	11.7	-0.5	0.1	4.1	9	7.1	9.2	6.9	13			22	112.47	114	115.75	102.71	109	112	114	100	115	117	118	105
23	6.21	4.3	2.34	2.34	1.8	1.8	0.9	0.1	9.1	6.6	3.3	4.4			23	107.91	111	112.75	108	105	110	111	104	113	113	115	110
24	7.72	10.15	11.15	2.18	4.4	4.3	10.3	0.3	10.7	12.6	12.6	3.5			24	112.4	116.62	114.55	114.89	109	113	113	113	116	120	116	116
25	9.88	3.68	-0.23	3	7	2.1	-2.1	0	12.4	6.1	8.4	7.1			25	106.27	111.92	114.83	113.71	102	108	111	110	111	115	118	117
26	10.08	16.02	13.48	8.32	8.1	14.8	12.5	6.3	12.2	18.1	14.6	11.2			26	106.13	95.2	93.22	95.64	104	93	90	93	108	100	95	97
27	2.95	7.46	9.23		-1.8	4	6.2		7.1	9.2	11.2				27	105.88	108.44	112.7		103	106	111		108	110	115
28	1.12	7.03	7.96	7.25	-0.7	6.5	7.1	5.6	3.4	8	9	9.3			28	113.15	113.2	105.78	102.8	110	112	105	102	117	114	108	105
29	1.25	10.07	11.04	4.84	-2	6.6	10.2	3.1	6.1	13.2	11.9	6.5			29	111.47	109.09	101.56	100.75	107	106	99	98	115	113	104	103
30	6.36	10.43	12.48	12.89	4.3	8.5	9.9	1.1	9.2	12.2	14.8	16.8			30	117.31	107.27	105.45	104.75	112	106	104	103	121	109	107	109
31	14.59	8.1	6.7	7.56	11.7	6.3	4	6.3	19.8	9.6	8.6	8.9			31	106.33	109.2	109.82	105.44	101	106	108	105	110	112	112	106
32	11.96	13.48	15.22	8.02	8.8	11.9	12.6	3	15.2	14.3	18.4	10.4			32	106.18	100.78	95.11	106.55	103	99	93	103	108	103	97	112
33	4.48	8	6.24	8.64	1.1	7.4	3.8	7	6.8	9.2	7.7	10.2			33	102.83	101.5	105.64	93.29	101	100	102	91	104	103	110	95
34	4.5	4.66	4.05	7.9	2.4	3.3	2.5	7	6.4	6.1	5.4	9.2			34	114.23	120.33	122.4	110.5	112	119	122	109	117	122	124	113
35	3.35	8.19	11.75	10.92	-2.2	6.3	8.2	9.4	6.7	9.9	13.9	13.4			35	106.7	107.57	102.27	100.7	105	106	96	99	108	109	111	102
36	14.17	7.62	12.25	11.9	10.1	5.5	10	10.1	17.6	9.1	13.4	14.7			36	94.77	98.67	92.45	99.6	91	97	91	98	100	102	97	101
37	-0.33	0.26	1.81	0.85	-2.7	-1.2	0.5	-1.6	1.7	1.8	2.7	2.3			37	117.76	118.54	116.91	108.25	115	117	115	106	120	120	120	112
38	6.46	8.45	5.44	9.08	4.7	6.7	3.3	6.1	8.5	10.7	7	12			38	106.75	104	104.36	91.25	106	101	101	90	108	108	108	93
39	6.46	8.72	1.93	7.36	3	6.9	-0.2	-2.3	9	9.7	2.9	9.1			39	101.89	105.55	107.46	106.36	97	104	106	104	107	107	110	116
40	8.57	10.4	6.09	7.78	-0.9	9.2	3.7	5.2	15	12.5	10	8.9			40	101.07	106.33	109.25	107.33	92	104	107	105	113	108	111	109
41	3.04	2.39	3.6	6.15	1	0.9	2.9	4.1	4.5	3.6	4.2	7.5			41	96.71	101	102.25	108.1	95	99	101	105	99	102	104	112
42	8.9	9.56	10.14	9.08	7.2	1.5	5.8	8	10.6	11.2	13.7	10.7			42	99.86	109	101.1	98.47	97	105	98	96	103	122	105	100
43	5.23	11.72	17.53	12.58	4.1	9.1	16.8	10.3	6.6	13.7	19.7	15.9			43	106	102.77	100.08	101.94	104	101	98	99	109	105	102	106
44	5.79	7.37	8	4.69	3.5	5.6	5.7	3.2	7.1	9	9.3	6.2			44	110.73	112.11	104.9	104	110	111	103	102	113	113	108	105
45	8.31	7.97	9.48	6.89	6.4	6.5	7.1	3.9	9.8	9.3	11.7	11.3			45	107.18	111.18	112	108.86	105	110	109	105	109	112	114	116
46	8.22	12.12	9.98	11.17	5.5	9.3	8.4	10	10.6	13.5	12.1	11.9			46	100.75	98.5	100.56	94.89	98	96	99	94	105	103	103	96
47	5.49	13.01	12.39	6.93	2.4	12.2	10	5	10.9	13.8	13.7	8.1			47	103.29	108.78	111	102.5	100	106	109	100	106	112	114	107
48	4.05	4.58	4.83	1.89	-0.9	3.5	3.2	0.8	12.8	5.5	6.2	4			48	109.71	114.75	118.36	121	104	113	115	120	112	117	121	123
49	7.03	7.45	6.16	0.89	5.2	6	4.2	-1.3	7.9	8.7	7.6	2.5			49	108.7	111.27	112.67	110.29	107	109	110	109	112	114	114	113
50	4.09	4.83	7.67	4.3	0.5	3.5	6.4	-2	5.8	6.6	9	8.3			50	106.72	109.36	101.1	105.5	102	108	99	99	111	111	103	110
51	-3.94	1.13	4.17	1.39	-6.4	-0.9	2.9	-1.3	-2.5	2.5	5.2	2.6			51	112.29	117.18	117.33	109.92	111	115	117	109	114	123	119	111
52	10.6	12.06	12.91	8.84	-1.1	11.2	12.4	6.3	12.8	13.6	13.5	12.5			52	104.56	103	100.57	111.5	102	101	99	109	110	104	102	114
53	-0.42	0.21	2.48	3.79	-3	-0.2	1.5	2.4	1.2	1	3.1	5.3			53	104.73	110.14	113.7	117.58	103	109	111	116	107	112	118	119
54	7.57	9.04	9.2	5.76	4.6	6.8	7.7	3.9	9.3	11.7	10.8	8.3			54	109.5	108.75	110.75	109.3	107	106	108	106	111	112	113	113
55	5.89	3.62	6.53	8.68	4.7	1.6	4.7	7.2	7	4.4	7.9	9.9			55	105.68	107.4	106	98.2	104	105	105	97	108	109	107	99
56	10.66	10.6	10.06	14.66	8	9.2	4.7	13.4	12	12	12.9	15.7			56	108.29	106.22	108.85	102	106	104	106	101	111	108	116	103
57	12.01	1.81	0.51	1.52	8.3	-0.2	-1.6	0.1	14.7	3	1.8	3.8			57	107.67	116.5	114.78	119.36	102	115	112	117	113	120	117	122
58	11.17	9.52	10.14	9.61	8.9	7.6	8.2	7.8	14.4	10.7	12.3	11.4			58	105.5	100.38	98.15	106.09	98	99	95	104	112	102	101	108
59	12.48	6.59	5.34	5.35	9.8	4.1	1.3	4.3	14.8	9.2	14	6.5			59	102.11	109.46	106.41	109.83	99	105	99	106	105	113	112	113
60	12.26	4.88	5.28	5.2	1.2	1.9	3.2	1.8	15.7	6.4	7.6	8			60	97.75	110.64	108.15	108.33	94	109	105	106	109	112	111	110
61	8.72	9.04	6.05	6.8	7.2	7.6	3.7	4.9	9.8	10.9	7.6	8.9			61	106.71	103.91	107.75	103.11	106	101	107	101	108	108	110	107
62	1.85	6.97	5.56	3.88	0	4.6	4.6	2.4	3.5	8.2	6.4	6.3			62	110.77	114.2	117.2	115.55	110	111	116	111	113	116	120	117
63	2.43	2.48	3.85	2.98	0.4	-3	1.7	1.2	4.5	5.9	5.1	4.1			63	112.44	116	109.67	105.64	111	112	107	104	115	121	112	108
64	1.08	-0.08	1.82	3.13	-1.1	-1.3	-0.8	1.8	2.8	1.2	4.1	4.4			64	111.62	118.3	111.8	104.5	104	117	107	102	118	120	117	107
65	5.62	3.81	7.37	7.19	3.2	-0.3	5.6	5	6.9	5.9	8.5	8.2			65	102.75	109.7	102.4	101.38	100	107	100	99	106	115	105	104
66	2.65	6.05	6.47	-0.61	-0.6	5.1	5	-2.7	5.2	7.4	8.6	0.6			66	110.44	113.73	112.75	115.88	107	111	110	114	116	116	115	119
67	14.84	9.4	15.16	13.54	13.3	8	11.7	11.3	16.2	10.7	17.2	15.3			67	97.21	105.1	96.3	100.9	95	102	93	98	100	110	102	104
68	3.15	11.22	11.22	10.88	-0.1	9.1	10.1	9	8.7	13.4	12.4	13.1			68	107.24	106.58	106.09	105.83	104	104	105	103	113	111	108	110
69	9.4	8.27	8.12	6.29	5.9	5.8	6.5	3.8	12.6	10.1	10.7	8			69	104.62	106.7	101.8	99.75	102	105	100	98	106	112	105	105
70	-0.17	3.92	5.5		-12.2	2.2	2.9		2.2	5.4	7.5				70	112.64	110.64	107.55		110	108	104		117	114	123
71	2.79	7.55	9.07	2.21	-0.7	3.3	5.8	1.3	6.6	10.7	11	3			71	107.5	109.92	111.5	120.64	105	108	110	119	109	112	115	122
72	2.07	6	8.4	8.98	0.1	5.1	5.8	8.1	4.4	6.6	11.5	9.9			72	104.08	111.8	106.5	111.18	99	109	103	110	108	115	111	113
73	6.19	10.24	10.66	12.96	4.1	8.5	8.4	11.1	7.9	12.6	12.4	14.7			73	107.86	106.38	110.08	107.55	106	104	107	106	109	108	114	109
74	0.46	5.44	6.04	2.63	-2.8	3.5	5.6	0.7	3.7	6.3	6.7	4			74	106.3	109.88	106.8	105.92	100	107	105	103	116	113	108	110
75	6.19	9.59	5.16	5.29	4	7.8	1.9	3.8	7.4	11.3	8.5	6.9			75	110.38	100.92	103.27	106.77	103	98	100	104	114	105	113	111
76	8.54	6.23	6.71	6.44	6.7	5	4.2	4.3	10.6	7.5	7.7	7.4			76	99.6	101.83	99.11	105.91	97	100	96	105	106	106	105	110
77	4.44	8.83	8.05	13.07	2.8	7.3	6.6	11.1	5.7	10.2	9	16			77	108.93	104.55	106.18	94.08	104	103	104	91	113	106	108	96
78	4.03	6.57	5.91	8.33	2.9	4.9	3.2	4.5	6.5	8.1	7.9	10.3			78	116.33	108	104.73	98.22	114	106	103	95	119	111	109	105
79	12.71	13.59	8.68	9.57	8.5	9.5	7	8.6	16.1	16.6	10.8	10.9			79	100.2	104.57	104	99.67	98	99	101	98	105	112	106	102
80	14.13	12.72	10.55	12.02	9.8	10.5	5.7	8.1	18.1	14.9	13.2	14.1			80	99.13	95.85	99.27	100.18	97	94	98	98	104	99	102	104
81	-4.25	1.47	10.76	4.06	-8.8	-1.1	9.5	3.5	0.2	3.6	11.8	5.4			81	108.23	110.73	92.08	104.38	104	109	89	103	111	116	96	106
82	8.67	7.45	9.09	7.36	1.3	5.5	8.1	6.2	12.1	9.2	10	8.5			82	101.28	110.7	106.15	102	99	104	104	100	105	114	108	104
83	10.46	3.65	4.33	6.99	-0.7	1.8	2.9	4	13.7	6.2	6.7	8.9			83	100.94	110.8	109.67	102.55	97	109	108	102	117	113	113	106
84	0.7	8.03	5.41	4.58	-4.2	5.9	3.7	0.8	4.5	10.7	7.9	6.4			84	113.18	103.8	107.38	107.82	108	102	101	104	117	109	110	113
85	4.95	5.8	5.25	1.49	2.1	3.8	1.7	-0.2	7	8.5	8.4	3.9			85	105.93	102.5	101.91	108.43	102	101	99	107	110	105	108	110
86	4.08	0	0.7	-0.4	1.4	-1.8	-1.8	-2	7.2	1.6	2.3	1.7			86	112.23	123.67	121.38	115.44	111	122	118	113	115	126	125	117
87	9.44	5.01	1.98	5.21	4.3	2.7	0.8	2.2	12.3	6.2	3.3	8.8			87	109.12	113.4	109	104.73	104	111	107	102	113	117	112	107
88	5.38	10.33	11.89	5.26	1.7	6.1	9.4	2.3	6.6	13.6	14.3	7.6			88	106.2	106.27	94.64	104.17	103	102	91	102	109	112	100	106
89	10.06	10.63	8.49	9.85	7.9	6.8	6.6	7	14.3	13.8	11.5	12.7			89	110.5	111.14	106.17	102.5	109	109	104	99	113	114	110	108
90	9.79	13.78	8.42	4.17	7.1	9.8	5.3	0.5	14.4	15.9	11.8	6.4			90	110.25	108.86	108.38	107.55	108	108	98	105	112	111	114	110
91	0.16	4.68	6.6	-0.24	-1.7	3.2	4.5	-1.7	4.8	6	7.9	0.8			91	113.64	114.33	119.78	119.85	110	110	117	117	118	117	123	122
92	7.47	2.24	0.46	3.65	3.4	-1	-2.2	2	10.6	5.4	3.3	5.1			92	105.83	102.07	102.25	101.4	104	101	101	100	109	104	105	103
93	1.1	2.46	-1.43		-0.6	0.8	-3.9		2.6	4.2	1.6				93	103	107.91	109.25		101	106	106		104	112	114
94	0.59	4.08	7.41	-6.92	-0.5	1.5	5.5	-12.2	2.8	5.7	10.4	-0.9			94	112.14	111.38	108.7	118	110	109	105	117	115	115	111	119
95	8.55	9.35	10.61	6.72	5.5	7.1	7.8	4.8	11.6	11.2	13.6	9.1			95	106.33	106.92	99.44	106	103	103	97	103	109	110	102	108
96	6.63	3.71	-1.81	-3.02	3.6	1.8	-4.1	-6.3	8.5	6.1	-0.5	-0.9			96	122.63	121.23	109.15	100.46	120	119	105	97	126	124	119	108
97	12.35	9.38	5.71	3.34	7.6	7.8	4	2.5	16.1	10.5	7.7	4.2			97	101.81	102.22	106.33	116.75	97	100	104	112	105	105	109	120
98	11.46	5.47	5.38	7	7.7	3.7	2.9	3.6	13.4	7	7.2	9.6			98	100.13	105.3	103.64	102	95	102	101	98	109	108	108	106
99	13.51	11.04	12.28	14.51	11.1	10	9.5	12.9	15	12.8	14.4	18.1			99	108.47	111.33	107.92	107.69	104	109	104	104	110	114	112	110
100	6.97	7.15	5.78	7.26	3.9	6.5	2.5	4.5	8.7	7.7	6.6	9.9			100	113.4	110.44	109.91	109.6	110	108	107	107	116	114	114	112
101	4.01	8.78	5.99	2.54	0	5.5	3.8	0.1	6.7	10.5	7	5.8			101	110.71	109	111.21	112.56	107	106	105	108	116	112	115	116
102	3.75	9.41	8.2	5.88	1.8	6.4	6.4	2.4	5	11.7	9.6	8			102	113.91	105.33	107.11	108.22	112	102	101	106	118	108	112	112
103	1.9	6.17	12.33	8.13	-1.5	3.8	7	6.5	4.2	8.5	14.6	11.8			103	112.06	109.4	107.1	105.25	106	107	106	103	118	112	111	108
104	12.54	9.83	8.28	7.3	8.2	7.4	6	5.4	17.6	11.2	9.6	8.2			104	113.11	109	105.69	105.45	109	105	103	103	117	112	112	107
105	3.51	0.77	0.36	3.03	1.5	-1.5	-0.9	-0.6	6.1	2	1.8	5.3			105	107.94	110.7	109.25	107.17	105	106	107	105	111	114	111	109
106	8.63	8.26	11.63	10.75	6.9	5.3	7.2	7.8	12	11	14	13			106	107.31	106.75	104.67	109	105	104	100	105	110	109	111	112
107	4.8	2.86	2.17	3.73	2.7	1.3	1.1	3	6.1	4.6	3.6	4.9			107	115.38	120.27	115.91	116	113	117	112	114	118	123	120	119
108	-1.14				-2.3				0.4						108	109.57				108				111
109	3.89	9.51	3.38	3.37	1.7	7.9	0.5	0.9	7.1	11.2	5.9	4.9			109	108.59	102.82	107.18	111.86	105	101	102	110	111	105	111	114
110	15.29	11.91	16.66	5.73	10	9.3	9.2	1.1	19.1	15.2	19.2	8			110	103.59	102.7	91.4	102.42	100	100	89	100	109	105	96	106
111	6.33	10.63	7.1	11.01	1.9	6.6	4.1	7	8.4	12.8	10.7	14.7			111	108.71	105.82	112.2	101.2	106	103	107	96	112	108	116	104
112	-0.96	5.27	0.59	-1.07	-3.8	1.6	-3.4	-4.4	3.5	8	3.1	2.3			112	105.68	100.85	101.57	107.85	104	99	100	105	108	104	103	111
113	3.05	4.47	2.27	5.26	1.6	3.2	0.6	3.3	4.2	6	3.9	6.8			113	111.78	114	108.25	103.14	106	112	106	101	119	116	110	104
114	0.83	0.51	2.11	1.91	-1.8	-0.2	0.8	0.4	3.4	1.5	3.1	4			114	113.78	113.73	108.3	103.57	111	111	107	102	117	116	111	105
115	-2.14	7.06	6.44	3.16	-6.7	5.6	5.1	2	1.7	8.6	8.1	3.8			115	108.2	109.08	109	101.63	106	107	106	100	110	111	111	103
116	-0.09	-2.89	-3.83	-3.32	-1.9	-4	-4.7	-4.6	1	-2.1	-2.9	-1.7			116	113.27	120.1	131.2	125.08	109	118	129	121	117	122	132	128
117	1.29	1.25	5.03	6.91	-1.5	-0.5	2.9	5.8	2.9	3.2	7.7	8.7			117	121.83	120.18	114.62	104.46	119	118	112	102	126	123	117	106
118	6.85	1.06	-3.42	-0.62	5.5	-0.1	-5.4	-7.4	8.2	2.1	-1.6	0.9			118	102.5	105	107	112.31	98	102	103	109	111	108	110	118
119	2.08	7.34	4.18	5.43	-0.1	5.7	2.7	3.2	5.2	8.1	5.3	8			119	110.05	108.92	110	111.44	105	106	107	107	113	113	114	115
120	2.25	3.93	4.12	1.81	1.2	3	2.6	0	3.3	4.8	5.2	3.2			120	110.86	118.15	113.86	108.88	108	115	111	100	114	122	119	115
121	1.81	2.65	1.81	1.12	0.6	1.8	1.1	0.2	2.7	3.7	2.5	2.1			121	106	114.54	118.64	117.89	103	109	115	116	109	119	121	120
122	15.04	3.21	4.34	8.03	10.6	1.9	1.6	6.1	19.5	8.3	7.1	11			122	105.23	107.79	108.93	111.33	102	106	105	108	108	109	118	114
123	10.67	7.85	4.75	6.69	7.6	6.1	2	4.1	14.3	9.1	8	8.8			123	112.83	109.55	114.36	107.8	110	107	110	105	116	113	117	113
124	2.26	4.25	8.72	3.53	-2.2	2.4	6.7	1.7	5.4	7.3	11.3	6.2			124	112.75	113.18	107.45	110.42	110	110	105	107	117	116	110	114
125	7.84	4.43	4.73	5.27	6.1	2.4	3	3.3	10	7.2	6.5	7			125	101.56	108	106.71	106.8	98	106	103	104	105	109	110	109
126	7.56	7.98	4.45	-1.64	6	7	2.3	-3.4	9.3	9.1	6.7	-0.2			126	110.38	113.08	114.36	117.8	108	111	112	116	112	115	118	119
127	8.24	5.33	5.97	8.43	4.9	4.4	-3.4	5.7	10.1	7	8.7	11			127	113.64	113.5	110.31	106.71	111	110	108	103	118	116	113	109
128	6.34	6.34	9.5	7.92	5	5.3	7.3	6.7	8.6	8	10.8	9.9			128	117.92	112.18	104.8	109.91	117	109	102	106	120	115	109	114
129	3.54	3.28	3.07	4.03	2.2	2.1	2	2.9	5.6	4.4	4.2	5.1			129	111.85	112.8	110.9	109.31	110	111	109	108	115	114	114	111
paO2 (mmHg)	average				min				max						paCO2 (mmHg)	average				min				max
Pat-Nr	0-24h	48-72h	96-120h	216-240h	0-24h	48-72h	96-120h	216-240h	0-24h	48-72h	96-120h	216-240h			Pat-Nr	0-24h	48-72h	96-120h	216-240h	0-24h	48-72h	96-120h	216-240h	0-24h	48-72h	96-120h	216-240h
1	89	76.28	71.34	66.45	73.9	60.6	65.8	37	99.2	94.4	79.8	101			1	35.08	41.49	50.9	50.49	32.4	38.9	48.5	38.3	37.3	44.9	53.5	60.4
2	71.39	77.03	72.4	80.33	55.7	74.2	64.2	73	81.6	80.1	80.1	85.6			2	50.63	46.7	45.36	47.8	47.5	42.8	42.5	42	54.3	48.9	49.1	52.9
3	72.84	67.7	74.93	79.86	57.5	56.8	38.1	68.5	103	102	125	118			3	45.51	43.98	44.9	44.7	44.1	37.3	38.4	38.3	48.1	52.6	63.9	50
4	66.65	60.59	74.81	69.78	65.4	55.9	67.7	59.7	67.9	65.7	87.2	81.6			4	59.7	52.19	46.26	45.38	55.3	45.9	44.6	43	64.1	58.9	48.1	47.6
5	78.01	77.01	76.85	75.62	53.4	72	72	68.4	91.6	86.1	79.5	85.9			5	42.63	44.33	43.28	39.92	33.1	41.6	42.1	37	53.5	46.6	44.1	42.6
6	90.66	76.02	74.13	71.47	63.2	67.3	67.2	57.1	167	81.9	80.4	79.4			6	41.06	43.72	44.18	40.24	34.5	41.4	42.4	32.5	44.6	45.4	45.2	46
7	71.4	102.17	75.52	59.64	58.9	81.6	61.6	44.1	90.8	151	86.2	71			7	33.26	36.82	43.4	39.74	32	35.3	42.1	33.3	35.1	38.7	44.6	46.1
8	71.99	75.75	69.23	67.73	66.7	57.1	53.2	57.8	77.1	92.3	78.9	75.7			8	43.88	49.17	51.51	43.16	38.4	42.5	48.7	41.4	48.2	52.2	54	47.6
9	62.39	82.93	77.37	73.96	13.3	74.5	66.4	70.1	107	88.4	88.2	78.9			9	44	47.71	56.91	54.02	33.2	41.7	50	52.3	72	55.8	66.7	56.4
10	78.14	74.12	66.72	71.58	69.8	68.8	59.3	64.7	100	80.1	79.4	82			10	51.15	49.21	59.07	55.56	37.7	44.2	55	52.6	60.7	55.2	64	58.5
11	84.44	93.38	72.67	100.93	77.1	86.3	68.9	82.3	93.5	103	76.9	131			11	40.28	44.98	46.62	49.16	26.2	43.3	45.2	43.4	58.5	46.9	48.6	54.2
12	86.78	83.87	97.44	10.95	68.9	64	79.6	81.8	130	101	135	141			12	61.28	44.52	39.88	39.91	56.1	42.6	36.2	36.9	67.7	47.1	42.1	42.6
13	86.29	77.06	86.2	79.84	71.5	65.3	77.1	69.1	107	83.1	97.9	108			13	38.93	41.17	41.24	47.03	32.9	38.1	38.5	42.8	44.5	47.8	43.7	51.5
14	70.86	82.13	94.08	79.31	60.1	62.5	84.8	65.4	81	99.2	103	104			14	53.29	47.66	50.09	42.54	46.1	44.8	45.7	37.6	61.9	54.1	53.9	47.4
15	84.16	79.75	74.48	69.43	54.3	60.4	64.9	63.5	101	94.9	91.8	72.6			15	51.23	54.32	50.88	49.71	48.2	45.9	47	47.5	53.5	62	54.8	51.6
16	67.94	83.05	84.88	74.34	62.4	67.8	63	65.5	83	104	99.2	86.4			16	45.59	39.94	41.46	41.83	39.5	34.2	34.6	38.2	52.2	42.6	48.2	47.2
17	84.45	78.06	76.88	88.88	61.2	66.1	71.7	71.5	152	87.3	86.9	105			17	45.39	48.16	47.36	45.34	34.2	38.2	44.4	42.3	55.2	52.1	51.6	49.5
18	72.65	74.52	71.94	75.93	63	71.3	68.9	63.6	83.2	84.5	73.9	87.6			18	49.28	45.01	43.6	41.56	44.7	44.1	42.6	38.6	58.1	46.3	45.5	43.5
19	70.33	68.8	74.68	80.5	56.5	66.9	63.9	77.8	87	72	82	83.2			19	54.42	63.1	55.64	50.77	44.8	59.1	50.8	50.5	72.5	68.8	60.1	51.2
20	71.08	91.6	78.39	72.53	49.1	89	47.7	64.3	88.9	95.1	99.3	86.6			20	50.33	44.52	43.6	54.28	44	42.7	35.9	49.8	55.2	47.1	52.6	58.9
21	71.13	78.54	99.12	71.53	59.9	67.8	78.9	56.9	88.2	99.8	117	117			21	43.41	46.62	41.1	50.84	36.3	36.1	39.4	43.5	50	57.2	42.8	55.1
22	79.1	72.23	79.84	85.46	60	59.8	75.3	73.2	123	85.7	85.6	105			22	38.55	43.87	41.17	48.24	34.5	36.2	37.7	42.9	44.7	54.3	44.2	52.1
23	113.13	86.64	75.63	74.81	67.2	72.7	37.3	69.4	182	102	94.6	83.1			23	42.86	45.33	43.72	48.67	36.4	39.2	40.5	44.5	46	48.8	50	50.8
24	80.32	72.89	86.43	82.7	63.5	65.6	77.6	70.3	106	78.4	99.1	117			24	45.22	54.09	46.47	42.57	39.8	47.5	44.5	40.1	50.4	60.4	49.6	51.7
25	86.29	77.75	74.73	69.87	55.6	67.8	65.9	58.6	146	107	86.3	93.3			25	41.75	43.61	43.85	41.04	34.9	38.9	40.3	37.5	47.5	47.3	47.5	48.4
26	88.23	71.38	70.23	78.91	69.3	63.9	64.9	59.6	109	83.5	76.6	106			26	44.9	54	48.38	43.37	30.4	48.3	47.2	41	55.1	56.7	49.5	45.6
27	68.92	65.67	76.9		64.3	56.5	62		72.5	74.7	91.9				27	47.93	40.98	49.92		43.9	39.7	42.3		50.7	42.2	55.1
28	86.73	80.21	79.14	77.71	78.9	64.4	70.9	75.4	95.4	123	87.3	80.7			28	44.6	50.75	50.9	47.3	41.2	48.4	49.4	41.6	49.6	52.3	52.7	51.6
29	74.35	81.29	94.93	78.17	65.7	64.8	78.7	63.6	79.6	93.4	114	89			29	36.12	46.71	45.47	38.03	30.9	45.1	40.7	36.3	47.1	48.5	51	39.8
30	86.01	79.67	72.83	95.93	54.3	60.7	65.7	70.4	142	96.7	80.9	119			30	47.29	59.01	56.02	53.55	39.8	53.2	51	44	54.7	70.8	60.4	58
31	71.02	68.5	72.48	75.76	56.6	59	64.3	69.4	105	77.6	85.5	83			31	47.42	48.16	49.97	44.57	33.5	43.5	45	40.3	62.9	57.1	57.3	47.9
32	91.68	92.19	85.16	80.01	75.1	79.3	70.1	63	112	108	104	88.8			32	54.53	51.94	53.59	46.64	48.6	48.3	50	41.3	64.2	57.3	57.5	51.7
33	84.68	85.46	79.21	98.2	76.7	75.8	66	92.4	92.1	98.1	86.8	104			33	42.58	44.88	44.39	46.95	37.6	42	42.2	46.4	45	47.2	46.9	47.5
34	57.86	55.21	62.84	78.46	51.8	50.1	58.7	66.9	64.6	62.2	66.9	96.5			34	43.22	35.74	38.01	40.87	38.1	33.6	33.5	38.8	49.1	37.6	40.7	44.4
35	88.72	68.6	74.8	89.22	71	65.1	64.2	78.3	105	72.9	78.6	96.8			35	37.7	45.17	51.94	54.23	30.9	42.9	49.2	50	42.3	47.9	57.1	62.8
36	77.02	71.47	69.8	71.9	68.5	67.5	63.1	64.2	85.6	78.3	76.5	84.9			36	41.92	44.05	49.8	50.46	38.3	40.4	49.6	44.9	47.2	46.6	50	59.4
37	77.47	72.21	69.36	66.81	58.6	59	60.3	61	92.5	81.7	90.5	75.1			37	40.37	36.56	35.01	43.91	30.4	34.3	33.7	40.2	48.8	40	36.4	46.4
38	82.35	75.92	80.88	69.63	65.5	69.2	66.6	33.1	104	79.5	88.8	103			38	39.48	48.7	40.2	50.7	27.8	44.1	34	46.1	42.8	54.9	43.5	57.7
39	110.5	75.28	90.92	82.89	97	63.8	74.2	68.5	122	97.5	113	96.6			39	40.85	53.96	52.17	49.74	38	50.4	48.3	44.7	45.6	60.9	55.4	55.9
40	79.39	86.29	72.35	83.1	40.3	67.2	59.1	52	128	95.8	88.9	109			40	35.21	38.23	43.99	40.97	24.6	36.6	31.7	36.3	50.2	39.2	48.5	46.4
41	88.01	81.27	75.19	74.9	51.1	66.5	71.7	60.6	123	99.8	81.4	87.8			41	41.69	44.04	40.17	48.23	38	42.3	33.7	44.8	44.9	45.7	45.9	51.3
42	86.6	74.5	77.56	82.19	75.2	69	71.7	64.4	102	80.3	82.6	103			42	45	51.19	53.09	50.32	33.2	47.4	46.3	44.6	52.4	59.7	63.7	64.6
43	70.18	70.38	74.46	67.44	55.4	58.4	58.9	50.1	80.4	98.3	93.2	82.2			43	41.63	50.64	52.8	50.11	29.5	44.1	48.5	41.3	48.1	55.6	58.1	57.7
44	77.19	75	76.83	76.88	62.4	65.8	66.6	68.7	107	82.8	100	81.2			44	42.7	53.49	47.07	47.68	36.8	51.2	42.4	41.6	47.8	56.3	52.4	52.8
45	83.33	67.86	74.77	76.79	59.9	59.8	59.7	66.8	125	75.1	83.8	83.1			45	44.98	45.14	42.96	50.6	32.3	44.3	40.4	46.3	59.1	46.3	45.9	54.9
46	80.16	72.25	81.84	82.84	69.5	62	64.1	71.2	114	82.8	93.7	112			46	48	55.89	48.51	55.21	32.9	40.9	43.2	53	64.2	61	52.9	56.5
47	82.54	79.6	83.6	90.07	67.2	72.1	78.3	75	103	86.5	88.9	113			47	43.01	51.65	46.15	43.97	33.6	50.3	46	41.3	51.3	52.5	46.3	48.4
48	68.08	64.83	73.03	74.71	54.1	60.2	63.7	67.2	89.7	70.1	84	84.3			48	44.48	46.73	48.78	50.59	35.3	42.8	44.3	46.5	50.9	52.7	52.1	53
49	76.18	65.18	66.4	83.5	56	58.2	63.9	68.2	93.4	75.7	69.2	106			49	37.83	42.5	40.73	40.3	34	40.1	38.2	39	41.9	45.1	43.2	41.5
50	72.96	70.66	64.14	68.73	57.6	62.2	56.5	53	92.3	79.2	70.9	84.8			50	41.34	43.49	48.84	36.62	35.3	39.3	46.7	30.2	48.9	47.3	50.9	41
51	79.17	64.13	70.69	71.6	58.7	61.1	62.7	60.7	102	69.5	76.9	89.7			51	30.77	40.45	40.5	45.99	27.2	38.4	35.5	42.4	37	42.6	47.3	50.7
52	82.66	96.04	85.72	74.78	67.5	73.2	68.9	70.7	109	118	102	80.6			52	49.26	53.01	52.9	47.2	44.7	51.1	49	39.5	58.2	57.7	58	55
53	61.12	61.46	69.95	87.04	46.5	51.9	64.3	82	81.5	70	92.6	93.5			53	49.88	46.43	44.96	48.55	41.3	43.5	42.4	47.2	60.2	50.4	49.2	51.8
54	70.5	66.55	71.38	75.31	57	58.2	64.6	68.6	89	73.9	78.6	80.8			54	40.93	46.03	46.16	47.9	33.5	39.1	43.2	42.5	45.2	50.6	49.8	52.8
55	56.5	59.93	69.11	79.65	49.5	57.8	50.7	71.1	77.7	62.5	84.3	91.2			55	39.6	37.89	41.82	49.63	33.6	35.1	36.6	46.8	42	39.8	49.8	52.9
56	70.27	82.9	73.95	73.44	53.9	79	70.9	67.7	87.4	86.5	76.8	84.7			56	46.79	50.8	47.23	60.44	42.4	49.4	45.5	59.2	52.2	51.7	48.9	61.4
57	77.42	73.39	80.16	84.64	53	62.2	64.8	64.7	133	84.7	105	120			57	32.71	37.45	40.14	32.81	26.9	34	37.1	29.1	36.6	41.3	42.6	36.5
58	77.86	81.45	66.06	72.69	71.5	72.1	53.2	62.4	85.9	89.7	78.4	94.1			58	58.81	55.15	50.29	47.99	53.8	51.4	42.9	45.4	64.8	62.4	55.6	49.4
59	68.24	77.68	78.65	77.89	39.2	62.3	61	65.2	81.1	97.2	108	88			59	41.24	40.26	42.96	40.59	38	37.6	36.1	36.6	49	42.1	45.6	49.7
60	74.09	79.74	78.14	86.64	47.1	59.2	64.6	56.7	106	96.4	98.5	137			60	48.23	50.31	46.68	43.16	44.4	43.4	42.5	37	58.3	53.5	51.2	51.4
61	84.96	77.57	77.8	76.57	75.8	67.9	68.8	68.4	109	90	86.5	84.5			61	47.44	51.12	43.46	47.49	40.4	49.6	41	44	52.3	53	44.6	51.3
62	64.35	72.48	77.71	67.28	57.6	67.4	71.8	60.6	73.7	78.4	82.7	77.9			62	42.08	47.33	45.53	44.95	36	46.3	43.7	44	52.8	48.8	46.8	46.2
63	73.59	83.6	73.27	70.79	62.9	70.4	65.1	61	82.4	100	83.2	77.9			63	36.46	40.91	42.13	43.06	28.2	37.7	39.4	40.5	45.5	44.8	44.4	47.2
64	71.58	75.48	78.11	80.73	62.3	72.4	67.3	75.7	83.9	78.1	90.9	90			64	33.81	35.22	38.73	43.11	31.4	33.9	37.2	40.2	39	37	40.6	45.4
65	69.72	73.45	74.33	79.47	61.9	65.5	67.4	70.9	78.5	86.2	84	87.1			65	37.23	42.23	44.52	45.75	31.1	38.2	41.3	44.4	45.8	46.7	46.5	46.9
66	74.31	71.73	68.4	81.42	51.2	65.2	60.2	73.7	122	77.2	79.9	87.5			66	45.65	41.55	41.64	44.17	26.5	36.3	36.9	42.5	60.8	45	44.6	46.6
67	79.72	68.96	65.75	65.77	63.3	59.8	60.2	62	131	72.7	69.3	70.7			67	44.98	43.89	50.71	51.84	33.4	36.7	46.7	47.9	49.3	47.4	54.6	55.9
68	68.87	74.66	82.99	71.83	60.4	59.1	66.7	60	81.1	91.4	112	87.6			68	43.86	46.18	49.19	48.36	38.5	41.5	39.3	45.1	52.9	51.3	54.9	51.1
69	73.93	78.93	81.6	76.77	68	73	75	72.7	80.5	83.6	86.5	80.5			69	36.4	42.39	48.13	42.41	29.4	38.2	46.1	40.2	40.8	43.9	50.9	45.3
70	65.84	81.34	83.94		57	58.8	65.2		90.9	111	114				70	46.68	43.09	41.39		40.8	40.5	39.3		51.9	46.3	42.6
71	68.56	63.95	66.67	68.74	54.5	58.4	56.5	58.8	77.6	75.7	76.6	74.2			71	40.94	41.74	47.46	48.73	32.6	37.8	43.4	47.1	55.3	43.8	50.5	51.8
72	83.68	90.7	83.84	87.34	71.6	79.8	66.2	75.5	104	103	109	101			72	38.47	43.75	50.87	48.27	37.3	40.5	42.5	42.7	40.5	46.9	63	50.4
73	89.17	77.23	86.64	73.46	72.6	60.2	75.5	62.3	121	95.7	100	89.3			73	44.45	47.82	48.21	49.24	33.8	43.8	47.1	42.8	51.1	51.5	50.3	66.8
74	80.3	70.1	75.92	73.07	74.2	63.2	64.5	62.4	93.3	76	89.4	84.2			74	37.18	45.33	47.24	39.6	30.3	44.2	42.1	36.3	41.9	47.5	49.3	42.1
75	85.19	62.33	71.5	71.83	56.8	48.3	66.5	65.9	140	78.5	78.6	83.2			75	40.48	47.69	44.03	46.11	32.2	42.5	31.4	42.5	46.3	60.9	50.7	50
76	98.4	68.94	63.22	66.75	81.6	61.8	58.1	59.1	123	81.2	69.7	74.4			76	33.55	42.81	48.52	44.45	28.5	36.6	46.4	44.2	36.4	46.6	50.8	44.7
77	83.04	77.32	79.29	67.98	48.9	64.6	66	57	110	94.5	110	79.6			77	46.67	47.9	50.58	54.63	42.1	41.9	45.5	52.1	49.8	51.4	56.9	58.4
78	74.38	73.08	68.47	72.7	67.7	68.6	62.3	69.1	80.9	79.7	72.8	75.9			78	42.13	43.13	44.32	49.44	38.8	39.7	43.1	46.3	46.2	46	46	55.6
79	68.89	64.01	77.33	78.57	55	56.4	66.5	70.5	77.7	80.2	85.5	89.4			79	44.47	48.03	49.92	48.3	33.8	45.2	44.5	46.4	55.6	50.5	53.7	49.3
80	63.9	63.26	63.78	72.65	52.1	56.6	59	64.9	75.7	74.2	69.4	76.7			80	44.38	52.3	55.85	49.29	34.4	46.9	54.1	43	52.8	58.4	60.8	52.8
81	70.48	76.1	66.64	93.9	62.6	67.6	60.9	67	87.8	81.6	71.7	152			81	30.93	39.73	45.8	43.24	26.6	34.8	42.6	40.8	33.5	45.9	48.3	46
82	72.81	71.56	67.33	74.09	67.1	65.4	59.6	62.2	82.4	79.7	71.9	84.6			82	48.44	50.38	49.43	48.27	45.3	48.6	46.1	40.9	55.5	52.3	52.6	54.4
83	74.28	73.33	69.76	76.79	37.8	64.9	48.7	64.9	170	78.2	80.8	91.9			83	40.4	37.91	35.66	44.47	33.3	31.5	34.7	42	45.6	42.1	36.8	47
84	72.96	74.01	70.38	66.7	65.1	65.9	65.6	54.3	90.5	91.7	74.8	76.7			84	32.83	43.68	45.71	42.53	27.3	42	43.5	39.5	36.5	48.5	49.1	47
85	76.21	70.9	61.94	75.83	56.5	57.5	56.8	64.4	87.6	77.1	65.8	86.4			85	39.86	49.34	52.86	41.41	33.6	47.8	47.9	39.9	48.2	51	55.5	43.2
86	79.88	72.2	77.97	76.13	66.5	60.8	72.7	62.4	95.4	86.5	84.7	83			86	39.64	46.4	48	37.3	31.6	42	45.4	36	46.7	49.2	49.4	38.1
87	64.39	80.17	75.75	81.23	39.3	61.8	71.7	72.4	86.7	95	80.4	89.5			87	49.61	43.41	42.1	46.52	35.1	41.2	41.7	44.3	97.4	45.7	42.6	48.5
88	69.37	81.05	82.45	77.77	55.9	72.4	73.3	64.7	81.3	92.9	93.2	86.3			88	44.16	58.2	48.96	49.63	36.6	49.9	40.2	46.2	55.5	62.9	57	51.7
89	67.31	60.81	66.22	61.56	52.8	53	59.3	50.6	79.4	67.9	70.6	68.4			89	47.98	46.25	45.4	49.43	39.6	42.6	42.1	44.7	53.1	48.7	47.6	53.1
90	66.31	69.28	76.72	76.17	56.3	64.2	64.9	63.9	73.7	82.2	85.7	81.9			90	50.59	48.59	43.87	38.22	41.7	46.2	38.6	36.9	54.8	50.6	47	39.1
91	66.44	77.37	68.72	72.37	60.9	54.8	60.1	60.2	72.5	86.1	74.2	89			91	38.96	45.49	44.39	40.22	25.4	41.4	42.8	36.9	47.7	51.1	46.5	42.4
92	69.5	69.34	73.11	71.91	49.8	63.5	62.3	63.9	78	81.9	85.3	77			92	44.26	42.73	37.38	41.38	35.1	40.5	33.7	39.4	48.5	45.1	39.5	42.7
93	76.82	78.69	76.42		37.9	61.9	62		97	99.6	106				93	45.5	48.9	48.13		38	42.1	45.6		49.9	56.1	50.7
94	62.44	60.45	51.1	59.28	53.9	55.7	47.2	46.4	69	63.7	55.1	70.7			94	38.13	38.28	42.89	34.63	29.5	33.7	40.1	31.4	41.9	41.6	45.5	38.1
95	71.47	69.4	77.61	86.66	50.4	59.7	62.2	71.8	96.3	78.4	87.6	122			95	47.21	51.83	55.31	49.46	38.2	46.1	50.7	41.1	56.9	55.3	59.6	52.9
96	83.08	78.21	87.03	82.06	60.4	67.1	66.4	59.9	132	105	134	97.5			96	35.77	43.73	45.8	31.92	25.3	35	35.4	30.7	43.4	56.2	54.7	33.4
97	61.99	64.77	62.58	78.91	40.1	62	59.8	73.2	73.1	69.3	67.3	86.4			97	45.87	52.61	47.1	41.27	38.2	50.6	44.7	37.9	51.8	55.4	51.1	46.4
98	74.58	79.7	86.25	73.41	57.1	72.9	78.9	61.4	92.4	86.1	97.8	80.9			98	39.93	42.38	40.08	42.35	32.3	38.8	37.1	39	44.6	45.8	44.1	44.6
99	81.93	75.33	70.44	73.86	68.7	70.5	60.2	64.8	104	78.6	83.5	83.3			99	50.15	50.1	52.44	49.36	44.9	45.7	47.4	45.4	57.8	53.4	60	56
100	60.05	61.69	66.72	61.37	53.6	55.7	51.2	55.8	66.3	73	80.7	65.4			100	41.44	45.47	43.93	46.38	36.1	42.3	35.6	42.7	44.4	49.1	47.3	48.3
101	68.58	72.13	69.79	76.64	55.4	67.5	64.3	55.8	71.7	84.5	78.3	88.7			101	36.35	40.58	42.12	42.53	26.9	37.4	40.7	31.1	42.1	42.2	44.2	49.9
102	88.02	83.26	73.37	77.67	64.5	67.9	66.3	68.9	125	107	88.2	86			102	47.28	44.44	52.83	48.94	38.6	41	45.4	45.4	52.6	48.9	62.8	53.5
103	80.98	81.13	77.26	86.69	59.3	71.5	72.4	78.2	104	86.3	83.1	103			103	43.8	51.21	55.05	44.38	40.1	47.8	51.8	40.9	48.2	57.1	58.2	48.7
104	72.05	67.72	64.38	67.86	54.8	59.4	58	50.8	129	96.2	70.6	81.4			104	45.18	48	49.28	41.86	37.2	40.8	43.1	37.4	50.8	57.4	54.8	45.6
105	92.46	78.89	92.51	102.08	63.1	72.8	63.5	70.2	115	86.5	136	130			105	52.69	47.04	38.91	44.48	50.2	44.1	34.6	41.2	57.8	50.3	44.5	47.5
106	78.71	75.83	72.97	82.63	66.1	67.3	56.9	68.3	102	88.3	85.9	122			106	45.19	46.03	49.85	45.02	30.2	42.8	45.1	37.4	54.3	51.6	53.9	53.4
107	65.17	88.63	87.59	82.96	56.7	67.8	72.4	72.7	79.4	125	103	94			107	32.02	38.54	36.28	42.1	29.7	35.8	30.6	37.9	35.3	42.1	39.9	46.1
108	81.65				58.7				138						108	32.07				28.7				37.7
109	97.22	85.15	97.63	97.1	56.3	68.8	79	85.7	146	109	119	122			109	32.24	40.6	40.62	39.5	24.3	37.9	32.5	36.3	41.8	46.9	50.6	43.3
110	70.25	68.44	68.85	78.83	59.3	64.2	64.9	64.7	84.4	72.4	74	128			110	50.25	54.53	52.9	40.81	45.6	49.7	48.4	39.1	53	56.7	57.5	41.7
111	73.26	89.98	70.59	80.8	55.3	62.5	56.2	61.6	101	110	96.7	109			111	44.91	44.26	46.58	46.94	32.1	40	42.1	36.5	50.4	47.4	50.9	55.1
112	77.55	75.83	87.71	76.34	65.6	62.4	62.6	61.3	90.5	97.5	129	122			112	46.56	45.65	38.28	48.59	38.2	43.1	35.1	46.2	53.1	49.6	41.7	52.2
113	85.21	83.36	81.58	100.97	64.9	72.4	72.3	78.1	111	96	88.2	132			113	34.53	38.43	37.33	45.34	20.5	31.8	33.5	39.9	42.9	43.1	39.1	49.8
114	91.97	84.62	74.35	87.64	34.7	72.6	65.4	70.7	120	106	84.2	122			114	36.84	35.06	34.93	36.21	31.6	33	31.6	28.8	42.7	37	43.7	41.2
115	86.77	99.91	101.01	84.39	63.7	75.7	70.8	62.5	143	121	121	103			115	45.08	35.09	39.57	39.96	30.8	31.8	37.6	34.9	56	39	41.5	44.3
116	71.24	76.09	75.25	80.71	63.1	69.4	58.6	68.7	78.4	87.3	86.6	92.6			116	50.26	38.03	37.44	38.49	45.4	36.3	31.5	37.1	56.3	40.9	40.8	39.6
117	60.66	65.67	69.23	65.35	54.6	58.5	65.4	33.9	66	81.6	73.6	79.2			117	37.49	43.72	38.21	50.03	34.1	42.4	32.3	45.8	40.9	47.4	41	57.2
118	97.23	90.5	81.33	72.28	62.4	58.4	72.3	64.6	142	110	90.7	79.8			118	48.83	44.65	50.3	42.06	45.3	42.5	46.9	40.1	52.3	45.9	53.9	43.9
119	88.25	74.91	90.14	89.89	59.9	55.3	74.3	62.3	139	107	114	112			119	36.3	39.13	36.78	42.41	31	32.4	31.6	35.9	40.7	44	45	48.6
120	82.53	74.95	90.16	67.49	57.6	63.6	73.3	59.2	104	96.6	140	77.2			120	36.45	41.11	38.87	40.92	29.3	35.7	31.5	35	49.2	49.4	52.2	46
121	71.74	79.87	78.74	78.34	58.2	62.9	66.5	67.4	91.5	142	89.2	103			121	43.08	40.04	40.76	44.94	40.9	37.4	38.3	42.8	45.6	43.4	43.6	47.9
122	73.36	70.79	69.11	73.32	53.2	41.2	64	58.3	101	91.5	81.4	91.9			122	42.98	45.53	43.99	40.88	39.5	40.2	35.9	39	45	48.1	51.2	43.7
123	77.58	64.51	72.34	77.5	57.1	60.7	57.1	52.6	99.1	75.6	82.5	93			123	49.92	54.99	43.33	42.74	42.3	49.5	41.5	39	58.1	59.2	45.5	46.1
124	76.82	79.32	68.91	73.39	62.4	59.7	57.2	62.4	116	105	83.9	79.4			124	38.63	44.1	46.35	43.43	32.1	38.1	40.2	40.5	43.2	48.4	52.1	46.9
125	79.62	76.18	68.25	73.75	62.8	66.7	56.7	62.2	94.3	86.4	82.5	83.2			125	50.11	43.26	51.13	43.7	37.3	37.4	46.9	37	55.9	48.9	54.9	47
126	82.01	74.31	70	85.23	57.7	67.3	52.9	67.6	103	83.1	95.7	129			126	36.71	42.27	39.33	34.91	30.1	32.2	33.6	31.4	44.5	46.1	44.2	41.2
127	93.84	81.93	82.51	91.36	54.4	60.2	68.4	71.2	128	104	110	134			127	37.08	40.45	43.24	56.5	29.6	35.5	36.8	46	41.3	44.7	47.3	82.9
128	87.81	85.56	76.19	80.61	69.7	72.5	61.4	72.6	100	133	100	92.7			128	38.27	42.79	43.61	44.13	28.7	38.7	39.5	39.4	46.3	51	46.8	49.1
129	80.22	76.61	71.58	97.75	59.6	68.4	64.9	85.4	136	83.7	75.5	125			129	35.98	46.03	45.68	46.58	31.2	42.5	43.2	38.2	41	49.8	48	56.2
Hb (g/dL)	average				min				max						Lactate (mg/dL)	average				min				max
Pat-Nr	0-24h	48-72h	96-120h	216-240h	0-24h	48-72h	96-120h	216-240h	0-24h	48-72h	96-120h	216-240h			Pat-Nr	0-24h	48-72h	96-120h	216-240h	0-24h	48-72h	96-120h	216-240h	0-24h	48-72h	96-120h	216-240h
1	10.12	8.88	8.68	9.81	9.4	8.1	8.4	9.2	11	9.4	9	10.5			1	15.11	11.88	11.08	9.56	12	10	9	6	18	15	13	14
2	9.76	9.36	9.34	9.54	9.4	9	8.8	9	10.3	10.1	9.8	10.3			2	6.83	6	6.56	5	5	4	4	4	9	8	10	6
3	11.5	10.59	10.05	9.61	10.3	10.2	9.7	8.8	11.8	10.9	10.7	10			3	13	12.64	9.82	7.62	7	10	8	6	34	14	12	9
4	9.83	9.07	9.17	9.15	9.4	8.7	8.9	8.8	10.4	9.3	9.8	9.5			4	12.17	6	7.2	2.7	9	5	6	2	16	7	8	3
5	8.37	8.79	9.44	9.81	7.8	8.5	9.1	9.3	9.2	9.2	10.1	10.3			5	19.46	17.17	15.89	12.14	13	14	14	8	27	21	22	16
6	11.75	10.49	10.15	8.9	11	10.2	9.4	8.2	12.5	10.9	10.9	9.7			6	32.08	17.11	13.42	17.71	26	15	12	14	36	19	20	21
7	13.24	11.38	12.95	9.74	12	11.1	12.4	9	14.3	11.9	13.2	10.8			7	22.93	15.8	17.27	11	19	13	14	5	29	19	20	25
8	9.75	8.44	9.17	9.77	8.5	7.9	8.3	9.3	11.6	8.9	9.4	10.3			8	17.56	9	7.33	13.15	13	8	7	11	21	11	8	15
9	11.3	8.26	7.82	8.96	9.4	7.9	7.5	8.7	12.9	8.6	8.2	9.2			9	18.5	10.89	9.82	8.71	15	9	8	7	26	13	11	11
10	9.06	8.7	8.58	8.34	8.5	8.5	8.2	8.1	9.4	8.9	8.9	8.6			10	9.33	8.08	8	6.7	5	6	6	6	12	11	10	8
11	11.31	11.44	10.44	10.14	10.6	9.9	9.5	9.5	13.4	19.2	10.9	10.5			11	9.29	7.78	8.6	4.1	6	6	5	4	14	10	12	5
12	10.31	11.58	11.6	11.96	9.8	10.6	10.6	11.7	11.8	12.9	12.1	12.3			12	11.36	14.08	12.67	13	8	10	9	6	30	20	19	17
13	14.42	11.61	11.68	10.81	12.6	10.7	10.8	10.5	16.5	12.7	12.9	11.1			13	23.8	10.2	13.22	12.18	17	9	12	12	31	12	15	14
14	10.9	9.54	9.86	9.05	10.2	9.1	9.6	8.7	11.7	10	10.3	9.4			14	8.69	12.85	11.5	10.85	6	10	9	7	11	16	16	14
15	9.85	8.63	10.47	11.33	8.4	6.7	10	10.9	12.3	17.2	11.4	11.8			15	13.92	11.88	9.1	10	9	6	3	7	20	23	14	13
16	13.27	11.08	10.1	9.3	12.6	10.3	9.4	8.8	14	12.1	11.1	9.9			16	8.5	9.5	8.6	6.4	6	8	7	5	19	13	12	9
17	12.43	12.25	13.07	10.82	11.7	11.6	12.3	10.2	13.3	13.6	13.5	11.3			17	10.87	12.31	10	7.09	9	8	7	6	13	22	15	9
18	12	11.36	11.36	10.39	11.3	11.2	11.1	9.8	13.4	11.6	11.5	10.9			18	8.79	8.8	8.5	10.67	7	7	7	6	11	16	10	16
19	8.53	9.13	8.87	9	8.1	8.8	8.3	8.4	8.9	9.5	9.4	12			19	14.91	10.7	14.42	10.33	10	8	10	8	21	14	23	13
20	8.11	8.22	9.16	9.06	7.7	7.8	8.9	8.3	8.8	8.7	9.4	9.7			20	6.94	9.55	7.4	8.75	4	8	5	6	9	15	10	12
21	10.64	9.47	10.18	9.36	9.7	9.2	9.7	8.3	12.2	10	10.8	9.8			21	25.5	7.82	7.09	3.7	10	6	6	3	49	9	8	5
22	11.4	11.38	11.49	11.64	9.7	8.2	10.8	11.2	13.9	12.1	11.9	12			22	21.8	9.21	7.92	12.71	12	8	6	8	32	13	10	20
23	11.75	10.39	9.49	8.34	10	10.1	8.9	7.8	13.2	10.6	10.1	8.7			23	20.55	14.33	6.75	8.27	12	11	5	6	30	22	10	17
24	13.79	11.2	10.65	8.86	13.3	8	10.4	8.2	14.4	11.8	11	9.1			24	18.3	11	11.09	5.44	17	8	9	4	20	13	13	7
25	8.17	8.78	8.73	9.39	7.7	8.1	8	8.3	8.5	12.6	11.7	10.3			25	22.2	13.92	11.5	18.71	8	10	10	13	35	17	13	24
26	8.53	8.65	7.92	9.37	7.6	8.3	7.2	9	9.4	9.2	9.2	9.8			26	22.87	11.9	11.88	15.91	14	11	10	12	40	16	15	19
27	13.76	11.44	11.24		12.7	10.8	10.5		14.5	12.2	11.8				27	23.75	12.78	13		16	11	10		30	16	16
28	9.6	8.5	8.98	8.54	8.3	8.1	8.8	8.1	10.2	8.9	9.1	9			28	13.46	12.7	12.56	16.6	9	12	10	10	17	14	18	24
29	8.42	7.95	8.74	9.46	8.2	7.7	8.6	8.9	8.7	8.3	8.9	12.2			29	13.18	18.73	18.67	11.38	9	15	14	5	23	23	25	16
30	11.41	10.93	10.08	9.78	10.6	10.6	9.8	9.3	12.7	11.7	10.6	10.1			30	11.56	13.18	17.91	18.17	8	10	13	13	15	19	20	23
31	9.18	9.16	8.45	9.13	8.7	8.8	7.8	8.9	9.5	9.7	9.4	9.5			31	7.44	5	6.45	8.33	5	4	5	6	11	6	8	10
32	11.38	11.1	11.39	10.85	10.6	10.6	10.8	10	12.3	11.4	12	11.3			32	9.87	11.33	14.11	6.91	7	9	9	5	14	13	19	10
33	11.73	11.26	10.84	10.21	11.4	11.1	9.7	10	12.6	11.4	11.4	10.9			33	15.42	10.17	7.09	3.71	10	8	5	3	25	15	10	5
34	11.32	10.83	11.61	8.43	10.5	10.2	11	7.8	11.9	11.6	12.1	9.2			34	11	9.83	13.2	8.44	9	8	7	6	14	13	19	12
35	12.82	11.7	12.35	8.2	12	11.3	11.4	7.6	13.4	12.1	13.1	8.8			35	13.2	10.93	10.73	12	11	10	10	10	15	12	12	14
36	9.51	9.44	9.25	9.01	8.8	8.9	8.7	8.5	11.4	10	10	10.2			36	16.62	24.22	26.45	45.6	12	21	21	28	22	27	29	62
37	10.84	10.7	9.96	9.31	10.1	10.2	9.7	8.9	11.8	11.2	10.5	9.9			37	10.76	9.46	7.36	5.33	7	7	6	4	15	12	8	7
38	8.49	8.79	9.15	8.09	7.7	8.2	8.7	7.9	9	9.2	9.4	8.5			38	12	14.9	17.55	14.92	9	12	17	11	16	18	19	19
39	6.54	8.02	7.85	8.14	5.7	7.8	7.3	7.6	8.9	8.3	8.7	8.7			39	9.22	14.45	7.46	12.09	4	12	6	4	17	16	8	15
40	8.72	10.18	10.12	8.93	7.1	9.8	9.6	8.1	10.9	10.5	10.4	10.1			40	11.85	11.67	9.92	10.83	6	9	7	6	22	16	12	16
41	8.77	8.92	9.56	9.39	8.1	7.7	8.9	9	10.2	10.8	12.9	9.7			41	20.14	9.9	9.17	13.1	11	7	6	11	32	24	13	16
42	10.9	9.93	9.31	8.33	9.9	7.3	8.2	7.6	11.9	10.9	9.8	8.9			42	14.5	8.92	8.1	9.27	11	8	7	7	22	11	10	13
43	11.17	11.04	11.03	9.38	10.5	10.2	10.3	8.5	12.1	11.6	12.1	10.4			43	14.43	12.54	13.83	18.88	12	10	9	13	19	14	17	32
44	9.92	10	10.03	10.64	9.4	9.6	9.6	10.3	10.6	10.3	10.4	10.9			44	11	10.11	12.7	13.11	10	9	9	11	14	12	20	17
45	9.78	9.48	9.07	8.5	9.2	9.1	8.6	7.7	11.6	9.9	9.6	12.8			45	15.24	11.73	11.9	7.07	9	10	7	3	25	15	20	11
46	9.36	9.07	8.77	8.47	8.6	8.5	8.4	8.1	9.8	9.5	9.4	8.8			46	13.19	7.8	7.22	8.33	8	6	6	5	21	11	9	10
47	8.36	7.77	9.49	9.81	8.2	7.6	8.3	9	8.6	8	10.2	10.8			47	12.86	8.33	7.56	6.63	9	7	6	4	19	9	9	12
48	8.49	8.62	8.59	8.88	7.3	8.2	7.7	8.1	9.2	9.3	9.2	9.5			48	13.36	9.92	9.18	12.42	8	7	7	9	24	14	15	14
49	11.13	11.94	12.38	10.13	10.9	10.7	11.2	9.3	11.3	13.2	13	10.7			49	19.5	9.18	8.58	5.71	14	8	4	4	28	12	12	7
50	12.11	9.88	10.48	10.4	10.4	9.4	9.6	8.6	15.9	10.1	11	11.1			50	15.56	11.73	10.5	17.5	10	9	8	9	24	14	14	36
51	7.47	8.68	8.06	8.53	6.3	8.3	7.9	7.9	8.9	9.1	8.2	9.6			51	17.86	6.82	7.44	6.92	11	5	5	5	26	11	10	9
52	7.83	8.79	9.01	9.06	6.4	8.5	8.8	7.2	9.3	9	9.5	9.9			52	6.94	5.36	5.4	11.33	5	4	4	8	10	7	7	16
53	7.99	8.72	8.36	9.31	7.3	7.8	8.2	9.1	9.3	9.2	8.5	9.5			53	8.07	6.5	10.6	7.17	6	6	9	5	11	8	12	10
54	8.88	9.09	9.26	9.05	8.1	8.3	8.7	8.6	9.8	9.4	9.6	9.7			54	19.11	11.17	11.75	13.8	13	8	9	12	24	13	14	16
55	10.74	9.95	10.18	9.77	9.6	9.3	9.8	9.3	11.4	10.5	10.7	10.2			55	10.56	11.7	13.75	8.9	8	8	12	7	14	15	15	12
56	8.71	9.52	9.45	8.44	7.7	8.9	8.4	8.2	9.8	10.2	11.5	8.8			56	11.57	8.33	8.46	8.83	7	8	6	8	17	10	12	10
57	8.61	8.24	9.08	8.91	7.6	7.6	8.1	8.5	9.4	8.6	9.6	9.3			57	12.8	8	8.33	9.5	8	7	6	7	20	10	12	12
58	9.65	9.75	10.53	11.42	9.3	9.3	10.1	10.9	9.8	10.2	11	12			58	11.6	8.69	12.5	10.45	9	7	9	7	14	10	22	14
59	10.36	8.72	8.84	8.99	9.6	8.2	7.9	8	11.2	10.2	9.8	11.6			59	15.78	7.77	6.18	9.08	13	5	4	7	22	15	11	12
60	9.21	9.34	10.08	10.22	7.3	8.7	9	9.8	10.3	9.8	11.2	10.6			60	7.41	8.83	13.46	11.25	4	6	10	6	11	15	18	18
61	8.44	8.95	10.21	10.31	8.1	7.6	9.3	9.7	9	9.6	10.7	10.6			61	7.33	6.27	7.5	7.33	7	5	6	6	8	8	9	9
62	11.02	10.01	8.29	8.25	10.6	9.4	7.9	7.7	12	10.8	8.6	8.9			62	10.69	6.8	9.3	15.91	9	6	9	13	13	7	10	19
63	10.65	9.52	9.67	9.09	9.8	8.6	9.2	8.8	11.7	10	11.3	9.6			63	24.11	11.42	8.25	6.64	17	9	7	5	36	14	10	8
64	8.02	8.16	8.27	9.28	7.3	8	7.5	8.7	9	8.3	8.7	9.6			64	7.77	5.8	10.7	16.7	6	5	7	13	10	7	14	20
65	11.08	9.88	11.63	12.59	10.4	8.7	11	12	12.2	10.7	12	13			65	12.19	7.3	10.2	17.25	7	6	8	14	19	9	12	21
66	12.49	10.74	9.9	8.51	11.5	9.8	9.6	7.5	13.4	11	10.7	9.2			66	19.28	9.18	11.33	6.13	12	7	9	5	34	11	13	7
67	9.01	9.95	11.49	11.98	8.6	9.2	10.7	11.5	9.7	11.2	12	12.4			67	10.07	9.4	16.3	13.6	8	7	13	10	15	11	20	18
68	11.79	11.2	10.38	9.82	9.4	10.2	10	9.5	12.9	11.6	10.7	10.1			68	13.76	15	10.09	10.33	7	11	8	8	33	18	12	12
69	14	13.25	14.3	9.58	13.5	11.9	14	8.5	14.6	13.7	14.7	10.6			69	22.58	10.7	9.67	12.83	13	9	8	9	29	12	11	17
70	11.52	10.76	10.98		8.4	10.1	10.2		13.3	11.1	11.3				70	14.23	15.57	18.73		8	11	3		22	23	32
71	10.49	8.53	9.54	8.57	10.1	8	8.3	8	11	8.9	10.3	9			71	18.92	20.25	10.64	9.64	15	14	8	6	22	28	13	16
72	9.51	9.09	9.93	9.08	8.9	8.9	9.5	8.6	10.2	9.4	10.5	10			72	13.09	12.2	14.29	19.36	9	8	11	17	17	19	23	22
73	10.02	9.44	9.5	8.52	9.2	9.2	8.9	8	11.3	9.7	9.9	9.4			73	12.36	13.69	16.25	13.73	11	12	12	10	14	20	20	24
74	11.41	10.56	10.17	9.7	10.4	10.2	9.8	8.9	12.7	10.8	10.6	10.7			74	11.4	8.25	7.3	8.5	9	7	6	5	14	10	9	10
75	13.56	14.32	13.13	10.05	12.8	13.6	10.9	9.1	14.8	15.5	14	10.8			75	11.77	12.33	8.78	4.69	9	8	4	4	15	18	16	6
76	10.75	9.05	8.68	8.42	9.5	8.7	7.9	8.1	15.2	9.5	9.2	8.7			76	29.2	9.17	13.44	11.82	18	7	10	10	44	11	17	15
77	9.11	9.79	9.96	9.66	7.8	9.1	9.3	9.3	10.2	11	10.6	9.9			77	10.5	10.91	11.73	16	8	9	9	12	14	14	15	20
78	10.12	9.25	9.43	9.93	9.3	9	8.9	8.9	10.6	9.6	10	10.4			78	8.83	10.09	7.55	8.89	7	9	6	5	12	13	10	26
79	8	8.01	8.71	10.18	7.2	7.1	8.5	9.9	8.3	8.7	9.2	10.4			79	10.87	9.57	5.82	10.75	8	7	5	9	14	14	8	13
80	10	9.14	8.89	9.61	9	8.6	8.7	8.9	10.9	9.6	9.2	10.1			80	8.44	5.15	5.36	9.36	5	4	4	7	14	7	7	12
81	11.28	10.11	10.17	9.49	10.6	9.7	10	9.2	11.9	10.4	10.4	9.9			81	23	14.64	8.42	7.75	11	12	6	4	32	19	11	11
82	8.68	9.33	8.55	8.84	7.7	8.8	7.6	8.2	11.5	9.9	9	9.6			82	9.94	6.2	5	9.08	6	5	4	7	15	7	6	11
83	9.09	8.69	8.31	8.87	8.4	8.4	8	8.7	9.9	8.9	8.7	9.4			83	13.82	11.8	11.75	10.18	5	10	11	9	19	15	13	11
84	10.67	9.46	10.18	8.65	10.1	8.6	9.8	8	12	9.9	10.7	10.5			84	11.18	5.4	6.23	19.71	9	4	4	11	15	6	9	28
85	9.96	9.08	8.46	9.53	9.1	8.1	8.1	9	10.6	9.7	8.8	9.9			85	9.69	6	6.8	5.9	6	5	6	4	13	8	8	7
86	8.8	8.72	7.71	8.79	8.2	8.4	7.1	8.6	9.7	9.3	8.2	9			86	8.23	6	4.25	6.22	6	4	3	5	10	9	9	7
87	11.37	9.19	9.26	9.16	9.9	8.9	9.1	8.4	13.1	9.6	9.4	9.5			87	13.24	8.3	7.88	10.91	6	7	7	10	22	9	9	13
88	10.5	9.21	9.67	9.58	9.3	8.7	9.2	9	11.4	9.7	10.9	10			88	9.8	10.91	9.55	10.75	6	9	8	7	13	13	16	15
89	9.04	8.71	8.77	8.35	8.3	8.1	8.3	7.8	15.3	9.6	9.2	8.9			89	10.64	9.29	10.44	9.58	8	8	9	6	14	13	14	14
90	8.94	9.44	9.61	9.23	7.4	9.1	9.3	8.8	9.3	9.7	10	9.6			90	12.25	12	13.08	17.18	9	10	10	15	17	15	28	21
91	12.68	9.58	9.09	8.01	10.8	9.2	8.6	6.6	14.3	10	9.4	8.8			91	13.18	6.22	7.27	8.15	9	5	6	6	17	7	9	10
92	9.04	9.14	8.71	8.8	8	8.6	7.7	8.2	10.6	9.8	13.4	10.5			92	16.06	9.67	9.08	10.5	8	7	8	8	27	22	11	16
93	8.66	8.99	8.36		8.1	8.2	7.8		9	10.1	8.9				93	8.25	8.64	7.55		6	6	5		11	13	12
94	11.46	10.8	10.22	9.02	10.4	10.6	9.3	8.8	12.1	11.1	10.6	9.2			94	19.93	15.5	9.1	41.5	18	11	7	10	26	20	11	71
95	8.14	9.48	10.37	9.5	7.2	9.3	10.1	8.8	8.7	9.7	11	10.3			95	9.28	11.77	12.56	14.91	5	9	11	13	15	14	15	17
96	9.55	9.23	8.36	8.03	9.1	9	7.6	7.8	9.9	9.5	9.6	8.5			96	18.38	12.38	9.46	9.62	14	9	6	6	34	14	23	17
97	8.43	8.84	8.93	9.33	6.7	8.6	8.6	8.8	9.3	9.3	9.5	9.7			97	7.14	4.8	3.71	11	5	3	3	9	13	7	5	14
98	9.39	8.95	8.7	8.07	8.7	8.2	7.9	7.1	10.1	9.3	9	8.7			98	13.75	7.1	6	10.22	11	6	5	8	16	8	8	13
99	8.72	8.29	9.29	9.48	7.7	8.1	9	9.1	9.2	8.4	9.8	9.9			99	15.67	10	9.5	9	12	7	7	7	21	12	11	14
100	10.8	9.58	9.39	9.18	10	9.3	7.2	8.8	11.8	9.8	10	9.4			100	17.1	11.33	10.73	14.5	11	9	10	13	23	16	11	19
101	9.89	8.41	8.29	8.25	9.3	8.1	8	7.6	10.8	9	8.6	8.7			101	20.93	10	9.36	10.61	12	9	8	8	37	12	11	14
102	10.73	11.6	10.89	9.68	9.7	11.1	10.4	9.3	12.1	12	11.7	10			102	18.75	10.11	8.67	7.89	10	9	7	7	31	13	12	9
103	9.46	8.68	9.16	8.23	9	8.5	9	7.3	9.9	9	9.4	9.2			103	14.47	10.8	18.1	6.75	6	8	16	5	26	13	21	12
104	11.28	10.98	10.1	8.45	10.8	10.3	9.2	7.7	12.1	12	10.6	9.2			104	15.28	15.08	10	11.18	12	13	8	10	21	17	11	13
105	8.26	8.71	9	8.17	7.6	8	8.7	7.9	9	9	9.3	8.4			105	9.13	6.3	6.67	6.57	7	4	5	4	12	7	8	9
106	10.82	9.2	9.75	8.27	9.7	8.4	8.9	7.5	12.6	9.7	10.4	9.4			106	13.85	8.5	14.25	19	8	6	7	14	24	14	18	27
107	11.13	7.72	8.49	8.73	10.9	7.4	8.2	8.3	11.3	8.4	8.9	9.4			107	16.09	13.42	11.82	12.83	12	11	11	11	20	18	15	15
108	7.71				6.3				9.1						108	9.57				8				12
109	10.31	11.77	13.07	8.76	9.5	11.4	12.1	8.5	11	12.3	14.1	9.1			109	21.5	17.91	12.55	7.71	9	16	9	5	41	20	18	12
110	8.75	8.95	10.44	8.05	6.5	8.4	9.6	5.4	11.7	9.7	12.9	8.6			110	15.76	13.9	14.9	10.08	12	10	11	7	22	17	18	12
111	8.83	9.02	8.15	9.25	7.9	8.5	7.4	7.9	9.5	9.6	8.9	10.8			111	11.65	15.73	19.2	17.2	10	13	14	14	18	18	24	20
112	9.1	9.45	8.96	8.22	6.5	9.2	8.5	7.5	10.9	9.8	9.4	9.1			112	6.84	8.92	9.14	4.85	4	5	7	2	11	11	11	7
113	12.25	10.45	11.16	9.3	11	9.9	10.9	8.9	14.1	11.1	11.5	9.7			113	13.28	13.57	10.75	9.71	8	10	8	8	19	17	12	11
114	10.7	9.75	10.16	10.11	10.1	9.4	9.6	9.7	11.2	10	10.9	10.4			114	9.5	12.45	17.4	12.86	8	10	12	5	12	14	21	20
115	10.78	9.88	9.98	9.83	10.5	9.7	9.7	9.5	11	10.1	10.3	10.3			115	14.1	13.17	9.64	7.88	9	11	8	5	19	15	11	13
116	7.86	8.39	8.62	8.87	7.3	8	7.3	7.8	8.8	8.8	9	9.3			116	9.07	13.86	8.3	8.25	5	8	7	6	14	18	10	10
117	8.54	9.97	11.8	9.28	7.8	8.3	11.4	8.9	9.9	10.7	12.3	9.7			117	14.89	8	8.77	8.54	10	6	7	8	22	11	11	11
118	7.83	8.46	8.16	7.97	6.7	7.9	7.8	7.4	9.2	8.8	8.6	8.3			118	10.33	10	12.57	8.31	6	7	10	3	14	14	17	11
119	9.08	8.43	8.52	8.26	7.8	7.3	7.9	7.7	14.7	9	12.7	9.4			119	15.52	21.58	12.62	11	13	17	8	9	20	29	17	15
120	10.65	9.93	9.34	8.33	10.3	8.8	9	7.5	11.5	10.8	9.9	10.1			120	17	11.08	9.93	6.47	14	9	9	4	20	13	12	9
121	8.74	8.47	8.58	8.21	8.1	7.8	8.2	7.7	9.6	9.3	9	8.6			121	12.87	15.46	10.73	7.67	8	13	8	5	17	18	13	10
122	9.57	9.35	9.26	8.53	8.8	8.2	8.6	8	10.7	10.5	9.9	10.2			122	13.57	9.29	8.71	17	9	6	6	11	19	13	11	31
123	8.55	9.45	8.85	9.48	7.7	9	8.3	8.3	9.8	9.9	9.3	11.4			123	9.26	6	7.73	9.33	7	5	6	6	13	8	9	14
124	9.14	9.04	9.42	8.61	8.5	8.5	9	7.6	10.8	9.4	9.8	10.1			124	19.38	9.55	8.73	8.42	12	8	7	5	32	10	11	14
125	8.99	8.32	8.48	8.59	8.4	7.8	7.8	8.2	9.7	9.3	9.1	9.3			125	10.13	8.58	7.79	5.4	7	6	6	4	13	13	9	8
126	10.32	9.72	8.24	8.43	9.7	8.8	7.8	8	11.1	10.4	8.5	8.8			126	17.13	10.69	9.64	9.7	14	8	7	5	21	13	15	17
127	8.97	8.96	9.11	8.69	8.2	7.8	8.4	8.3	10	9.4	13.1	9.3			127	13.86	12	13	7.07	11	10	6	4	22	14	23	10
128	9.51	8.62	8.93	8.27	6.4	7.8	8.5	7.7	11.5	9.2	9.3	8.8			128	24.54	18.08	17.9	13	19	14	14	11	31	25	22	16
129	10.08	9.6	9.53	8.97	9.3	9	9.1	8.3	11.1	10.1	10.2	9.4			129	11.15	6.9	6.4	7.54	9	6	5	6	14	8	9	9

## Sheet: laboratory diagnostics
Troponin (ng/L)	average				min				max					GFR (mL/min/1,73 m2)	average				min				max					Creatinine (mg/dL)	average				min				max					Urea (mg/dL)	average				min
Pat-Nr	0-24h	48-72h	96-120h	216-240h	0-24h	48-72h	96-120h	216-240h	0-24h	48-72h	96-120h	216-240h		Pat-Nr	0-24h	48-72h	96-120h	216-240h	0-24h	48-72h	96-120h	216-240h	0-24h	48-72h	96-120h	216-240h		Pat-Nr	0-24h	48-72h	96-120h	216-240h	0-24h	48-72h	96-120h	216-240h	0-24h	48-72h	96-120h	216-240h		Pat-Nr	0-24h	48-72h	96-120h	216-240h	0-24h	48-72h	96-120h
1	15.63	11.9	29.5	37.2	11.3	11.9	29.5	37.2	20.3	11.9	29.5	37.2		1	108	112	116	105	107	112	116	105	109	112	116	105		1	0.63	0.58	0.53	0.68	0.61	0.58	0.53	0.68	0.64	0.58	0.53	0.68		1	62	64	60	94	55	64	60
2	114.5				110				119					2	102.67	110	113	120	102	110	113	120	104	110	113	120		2	0.79	0.66	0.63	0.54	0.77	0.66	0.62	0.54	0.8	0.66	0.63	0.54		2	94.67	81	64.5	53	86	81	64
3	32.5		58.2	103	32.5		58.2	103	32.5		58.2	103		3	106	102	73	39	106	102	73	39	106	102	73	39		3	0.87	0.92	1.21	2.04	0.87	0.92	1.21	2.04	0.87	0.92	1.21	2.04		3	81	88	119	218	81	88	119
4	41.2		35.8	28.9	26.9		35.8	28.9	55.5		35.8	28.9		4	65.5	79	69	79	65	79	69	79	66	79	69	79		4	1.34	1.15	1.28	1.15	1.33	1.15	1.28	1.15	1.35	1.15	1.28	1.15		4	73.5	69	79	83	73	69	79
5	28.55		23.2		26.9		23.2		30.2		23.2			5	96	113	111	121	93	113	111	121	99	113	111	121		5	0.75	0.55	0.58	0.45	0.73	0.55	0.58	0.45	0.77	0.55	0.58	0.45		5	63.5	74	87	73	61	74	87
6	597		466	115	580		466	115	614		466	115		6	86.5	98	102	79	84	98	102	79	89	98	102	79		6	0.98	0.86	0.77	1.06	0.96	0.86	0.77	1.06	1	0.86	0.77	1.06		6	87.5	83	76	83	86	83	76
7	37	16.1	8.8	940	37	16.1	8.8	940	37	16.1	8.8	940		7	125	123	117	31	124	123	117	31	126	123	117	31		7	0.73	0.75	0.85	2.66	0.71	0.75	0.85	2.66	0.74	0.75	0.85	2.66		7	34.5	30	51	262	31	30	51
8	19.85	27.4	18.4	13.8	19.5	27.4	18.4	13.8	20.2	27.4	18.4	13.8		8	75.5	104	108	105	70	104	108	105	81	104	108	105		8	1.1	0.74	0.67	0.72	1.03	0.74	0.67	0.72	1.17	0.74	0.67	0.72		8	73.5	44	58	55	70	44	58
9	12.2		5.2	12.3	12.2		5.2	12.3	12.2		5.2	12.3		9	106	111	93	100	106	111	93	100	106	111	93	100		9	0.9	0.8	1	0.94	0.9	0.8	1	0.94	0.9	0.8	1	0.94		9	34	42	79	76	34	42	79
10		102		14		102		14		102		14		10	52	46	62	71	52	46	62	71	52	46	62	71		10	1.52	1.68	1.31	1.16	1.52	1.68	1.31	1.16	1.52	1.68	1.31	1.16		10	85	121	121	93	85	121	121
11	5	4.8	4.3	19	4.4	4.8	4.3	19	5.6	4.8	4.3	19		11	114.5	122	112	122	113	122	112	122	116	122	112	122		11	0.61	0.52	0.64	0.52	0.59	0.52	0.64	0.52	0.62	0.52	0.64	0.52		11	22	29	24	26	22	29	24
12		12	9.6	12.9		12	9.6	12.9		12	9.6	12.9		12	111	112	109	119	111	112	109	119	111	112	109	119		12	0.8	0.79	0.83	0.68	0.8	0.79	0.83	0.68	0.8	0.79	0.83	0.68		12	58	67	85	47	58	67	85
13	116.5	37.3	40.9	34.1	116	37.3	40.9	34.1	117	37.3	40.9	34.1		13	21	24	31	58	20	24	31	58	22	24	31	58		13	3.22	2.85	2.3	1.37	3.1	2.85	2.3	1.37	3.34	2.85	2.3	1.37		13	167.5	157	140	110	163	157	140
14	75.1		106	154	75.1		106	154	75.1		106	154		14	55	52	42	41	55	52	42	41	55	52	42	41		14	1.53	1.61	1.92	1.95	1.53	1.61	1.92	1.95	1.53	1.61	1.92	1.95		14	106	111	151	85	106	111	151
15	32.75	32.2		83.7	31	32.2		83.7	34.5	32.2		83.7		15	26	18	25	43	26	18	25	43	26	18	25	43		15	2.68	3.63	2.71	1.77	2.66	3.63	2.71	1.77	2.7	3.63	2.71	1.77		15	95.5	209	204	238	93	209	204
16	15.1		11	12.7	15.1		11	12.7	15.1		11	12.7		16	75.67	53	53	106	66	53	53	106	89	53	53	106		16	0.91	1.2	1.2		0.79	1.2	1.2		1.01	1.2	1.2			16	21.33	51	85	66	17	51	85
17	32.75		33.8	86.9	32.4		33.8	86.9	33.1		33.8	86.9		17	32.67	34	44	30	31	34	44	30	34	34	44	30		17	2.11	2.03	1.66	2.28	2.06	2.03	1.66	2.28	2.2	2.03	1.66	2.28		17	116.67	129	117	217	111	129	117
18	51.9		46.3	75.9	51.9		46.3	75.9	51.9		46.3	75.9		18	19.5	32	39	49	18	32	39	49	21	32	39	49		18	3.26	2.15	1.85	1.52	3.08	2.15	1.85	1.52	3.43	2.15	1.85	1.52		18	251.5	203	180	150	240	203	180
19	15.9		16.4	19.2	15.9		16.4	19.2	15.9		16.4	19.2		19	107.5	102	99	107	107	102	99	107	108	102	99	107		19	0.54	0.64	0.7	0.55	0.53	0.64	0.7	0.55	0.55	0.64	0.7	0.55		19	51	52	57	68	50	52	57
20	290			94.7	265			94.7	315			94.7		20	103	103	112	112	102	103	112	112	104	103	112	112		20	0.86	0.86	0.69	0.54	0.84	0.86	0.69	0.54	0.87	0.86	0.69	0.54		20	46.5	68	64	35	44	68	64
21	69.6		424	44.1	50.4		424	44.1	88.8		424	44.1		21	68.5	99	104	99	61	99	104	99	76	99	104	99		21	1.23	0.88	0.79	0.9	1.12	0.88	0.79	0.9	1.34	0.88	0.79	0.9		21	41.5	62	46	50	37	62	46
22	145		93.4		130		93.4		160		93.4			22	44.5	81	76	81	37	81	76	81	52	81	76	81		22	1.71	1.02	1.08	1.02	1.47	1.02	1.08	1.02	1.95	1.02	1.08	1.02		22	91	76	76	75	90	76	76
23	192.5			29.8	153			29.8	232			29.8		23	52	77	80	102	43	77	80	102	61	77	80	102		23	1.49	1.05	1.01	0.69	1.27	1.05	1.01	0.69	1.71	1.05	1.01	0.69		23	67	61	62	62	60	61	62
24	13.35		11.1	23.5	11.4		11.1	23.5	15.3		11.1	23.5		24	66	71.5	82	87	59	71	82	87	73	72	82	87		24	1.26	1.18	1.05	0.99	1.15	1.17	1.05	0.99	1.37	1.18	1.05	0.99		24	75.5	104	98	68	75	104	98
25	10.9	15.8		78.1	10.9	15.8		78.1	10.9	15.8		78.1		25	88.5	78	91	97	85	78	91	97	92	78	91	97		25	0.91	1.02	0.88	0.76	0.86	1.02	0.88	0.76	0.95	1.02	0.88	0.76		25	87.5	122	122	110	86	122	122
26	31.55	23.9		40.7	28.3	23.9		40.7	34.8	23.9		40.7		26	82.5	96	95	96	78	96	95	96	87	96	95	96		26	0.76	0.58	0.6	0.58	0.72	0.58	0.6	0.58	0.79	0.58	0.6	0.58		26	103	85	70	67	100	85	70
27	60.15		15.6		49.7		15.6		70.6		15.6			27	53	70	100		46	70	100		60	70	100			27	1.81	1.42	1.05		1.6	1.42	1.05		2.01	1.42	1.05			27	59.5	109	112		55	109	112
28	28				28				28					28	106	107	118	125	106	107	118	125	106	107	118	125		28	0.62	0.6	0.47	0.41	0.62	0.6	0.47	0.41	0.62	0.6	0.47	0.41		28	42	55	53	34	42	55	53
29	27.8		20.9	11.5	27.4		20.9	11.5	28.2		20.9	11.5		29	60	45	65	87	58	45	65	87	62	45	65	87		29	1.01	1.28	0.94	0.74	0.98	1.28	0.94	0.74	1.03	1.28	0.94	0.74		29	39	73	97	61	37	73	97
30	10.9	4.8		22.6	9.5	4.8		22.6	12.3	4.8		22.6		30	126	119	111	90	119	119	111	90	133	119	111	90		30	0.56	0.63	0.74	1	0.48	0.63	0.74	1	0.63	0.63	0.74	1		30	18.5	47	54	111	15	47	54
31	90.5		52.5	49.2	90.5		52.5	49.2	90.5		52.5	49.2		31	99	98	104	112	99	98	104	112	99	98	104	112		31	0.83	0.86	0.73	0.61	0.83	0.86	0.73	0.61	0.83	0.86	0.73	0.61		31	73	59	54	46	73	59	54
32		10	13.4	17.1		10	13.4	17.1		10	13.4	17.1		32	88	99	95	100	88	99	95	100	88	99	95	100		32	0.97	0.84	0.91	0.81	0.97	0.84	0.91	0.81	0.97	0.84	0.91	0.81		32	71	64	97	96	71	64	97
33	36		10.3	9.3	30.3		10.3	9.3	41.7		10.3	9.3		33	102	109	110	112	100	109	110	112	105	109	110	112		33	0.9	0.78	0.77	0.73	0.86	0.78	0.77	0.73	0.92	0.78	0.77	0.73		33	34	50	57	38	30	50	57
34	40.1	33.1	33.2	42.4	34	33.1	33.2	42.4	46.2	33.1	33.2	42.4		34	81.5	97	94	92	74	97	94	92	89	97	94	92		34	0.95	0.7	0.76	0.8	0.86	0.7	0.76	0.8	1.03	0.7	0.76	0.8		34	81.5	84	86	77	80	84	85
35	23.4	14.6	11.7	8.5	17.9	14.6	11.7	8.5	28.9	14.6	11.7	8.5		35	81.5	102	63	91	71	102	63	91	92	102	63	91		35	1.12	0.92	1.36	1.01	1	0.92	1.36	1.01	1.23	0.92	1.36	1.01		35	55	76	75	67	51	76	75
36	20.3		16.2	32.1	18.7		16.2	32.1	21.9		16.2	32.1		36	118.5	127	130	81	117	127	130	81	120	127	130	81		36	0.48	0.4	0.38	0.99	0.46	0.4	0.38	0.99	0.49	0.4	0.38	0.99		36	44	47	26	83	40	47	26
37	28.6		22.7	42.5	28.6		22.7	42.5	28.6		22.7	42.5		37	29	35	38	41	29	35	38	41	29	35	38	41		37	2.62	2.24	2.09	1.93	2.61	2.24	2.09	1.93	2.63	2.24	2.09	1.93		37	75.5	96	102	109	70	96	102
38	22.8		10		22.8		10		22.8		10			38	97	96	98	96	97	96	98	96	97	96	98	96		38	0.67	0.68	0.64	0.69	0.67	0.68	0.64	0.69	0.67	0.68	0.64	0.69		38	26	36	47	37	26	36	47
39	178		137	157	178		137	157	178		137	157		39	56.5	95	92	109	45	95	92	109	68	95	92	109		39	1.35	0.77	0.83	0.54	1.12	0.77	0.83	0.54	1.58	0.77	0.83	0.54		39	86.5	37	49	52	70	37	49
40	14.9	13.4	18.9	35.7	13.3	13.4	18.9	35.7	16.4	13.4	18.9	35.7		40	129.33	123	123	124	126	123	123	124	132	123	123	124		40	0.3	0.35	0.35	0.34	0.28	0.35	0.35	0.34	0.32	0.35	0.35	0.34		40	26.33	35	66	59	21	35	66
41	44.75		80		44.1		80		45.4		80			41	14	16	17	44	12	16	17	44	16	16	17	44		41	3.62	3.12	2.97	1.38	3.28	3.12	2.97	1.38	3.95	3.12	2.97	1.38		41	95	129	191	218	83	129	191
42	10.95	8.6		8.9	10.6	8.6		8.9	11.3	8.6		8.9		42	106	103	103	108	102	103	103	108	110	103	103	108		42	0.81	0.87	0.86	0.77	0.73	0.87	0.86	0.77	0.88	0.87	0.86	0.77		42	42	52	54	52	40	52	54
43	11.65	8.9	10.7	16.5	11.5	8.9	10.7	16.5	11.8	8.9	10.7	16.5		43	108.5	101	94	96	108	101	94	96	109	101	94	96		43	0.64	0.76	0.9	0.86	0.63	0.76	0.9	0.86	0.64	0.76	0.9	0.86		43	45	62	80	80	41	62	80
44	11		8.2		11		8.2		11		8.2			44	54	68	68	85	49	68	68	85	59	68	68	85		44	1.18	0.97	0.96	0.8	1.09	0.97	0.96	0.8	1.27	0.97	0.96	0.8		44	66.5	69	70	82	66	69	70
45	19.3	10.3	10.3	15	19.3	10.3	10.3	15	19.3	10.3	10.3	15		45	87	102	94	102	80	102	94	102	94	102	94	102		45	0.79	0.67	0.74	0.66	0.74	0.67	0.74	0.66	0.84	0.67	0.74	0.66		45	57	71	66	53	53	71	66
46	5.9	6.8		35	5.3	6.8		35	6.5	6.8		35		46	125.5	119	118	127	123	119	118	127	128	119	118	127		46	0.32	0.37	0.38	0.31	0.3	0.37	0.38	0.31	0.34	0.37	0.38	0.31		46	22	28	30	39	21	28	30
47	123	25	29.8	29.3	123	25	29.8	29.3	123	25	29.8	29.3		47	53	79	101	111	50	79	101	111	56	79	101	111		47	1.51	1.08	0.85	0.67	1.44	1.08	0.85	0.67	1.57	1.08	0.85	0.67		47	63.5	86	84	57	62	86	84
48	64.7		55.2	154	64.7		55.2	154	64.7		55.2	154		48	42	55	62	54	42	55	62	54	42	55	62	54		48	1.76	1.4	1.28	1.44	1.76	1.4	1.28	1.44	1.76	1.4	1.28	1.44		48	159	155	161	200	159	155	161
49	33.4				33.4				33.4					49	90	86	94	99	90	86	94	99	90	86	94	99		49	0.98	1.01	0.94	0.9	0.98	1.01	0.94	0.9	0.98	1.01	0.94	0.9		49	34	64	86	51	34	64	86
50	19.13				13.4				22.7					50	108.67	118	126	129	101	118	126	129	120	118	126	129		50	0.78	0.62	0.53	0.5	0.6	0.62	0.53	0.5	0.9	0.62	0.53	0.5		50	33	44	43	35	25	44	43
51	274	171.5	107	79.5	274	169	107	79.5	274	174	107	79.5		51	18.33	30	61	101	18	30	61	101	19	30	61	101		51	2.75	1.83	1.01	0.57	2.7	1.83	1.01	0.57	2.79	1.83	1.01	0.57		51	151.33	162	109	84	142	162	109
52		20.7	22.4	19.2		20.7	22.4	19.2		20.7	22.4	19.2		52	112	107	112	109	112	107	112	109	112	107	112	109		52	0.56	0.62	0.56	0.59	0.56	0.62	0.56	0.59	0.56	0.62	0.56	0.59		52	55	55	64	88	55	55	64
53	111				111				111					53	55.33	43	46	68	52	43	46	68	59	43	46	68		53	1.43	1.76	1.66	1.2	1.35	1.76	1.66	1.2	1.5	1.76	1.66	1.2		53	78	96	127	216	73	96	127
54	8.2	5.9	6.4	6.6	8.2	5.9	6.4	6.6	8.2	5.9	6.4	6.6		54	107	117	121	124	107	117	121	124	107	117	121	124		54	0.78	0.64	0.59	0.55	0.78	0.64	0.59	0.55	0.78	0.64	0.59	0.55		54	78	66	57	68	78	66	57
55	7.25	12.8	9.7	11	6.9	12.8	9.7	11	7.6	12.8	9.7	11		55	130.67	124	130	130	125	124	130	130	134	124	130	130		55	0.5	0.57	0.51	0.51	0.47	0.57	0.51	0.51	0.56	0.57	0.51	0.51		55	28.67	39	29	44	26	39	29
56	10.4		9.3	23.5	10.1		9.3	23.5	10.7		9.3	23.5		56	115	121	109	125	113	121	109	125	117	121	109	125		56	0.58	0.51	0.66	0.47	0.55	0.51	0.66	0.47	0.6	0.51	0.66	0.47		56	30.5	36	58	66	26	36	58
57	22			86.7	20.8			86.7	23.2			86.7		57	97.5	96	102	108	96	96	102	108	99	96	102	108		57	0.77	0.8	0.68	0.6	0.74	0.8	0.68	0.6	0.79	0.8	0.68	0.6		57	56.5	63	58	75	54	63	58
58			8.4	8			8.4	8			8.4	8		58	122.5	130	125	132	121	130	125	132	124	130	125	132		58	0.59	0.51	0.56	0.49	0.57	0.51	0.56	0.49	0.61	0.51	0.56	0.49		58	54	51	56	86	53	51	56
59	11.85	10.2	7.7	8.9	11	10.2	7.7	8.9	12.7	10.2	7.7	8.9		59	132.5	132	146	153	130	132	146	153	135	132	146	153		59	0.55	0.55	0.43	0.38	0.52	0.55	0.43	0.38	0.57	0.55	0.43	0.38		59	62.5	79	64	52	58	79	64
60	41.2	36.7	25.4	19.6	41.2	36.7	25.4	19.6	41.2	36.7	25.4	19.6		60	112.5	113	108	124	112	113	108	124	113	113	108	124		60	0.44	0.42	0.48	0.32	0.43	0.42	0.48	0.32	0.44	0.42	0.48	0.32		60	23	47	66	37	23	47	66
61	22.7		20.8	11.9	20.7		20.8	11.9	24.7		20.8	11.9		61	112	113	113	115	108	113	113	115	116	113	113	115		61	0.58	0.56	0.56	0.54	0.53	0.56	0.56	0.54	0.63	0.56	0.56	0.54		61	73.5	66	61	61	72	66	61
62	8.25		4.5	4.5	7.1		4.5	4.5	9.4		4.5	4.5		62	113	114	73	106	112	114	73	106	114	114	73	106		62	0.52	0.5	0.93	0.63	0.5	0.5	0.93	0.63	0.54	0.5	0.93	0.63		62	12	14	57	68	12	14	57
63	28				20.3				35.7					63	103.5	103	111	119	101	103	111	119	106	103	111	119		63	0.64	0.63	0.53	0.45	0.6	0.63	0.53	0.45	0.67	0.63	0.53	0.45		63	30.5	71	74	52	30	71	74
64	51.05		16.9	5.7	45.4		16.9	5.7	56.7		16.9	5.7		64	127	116	129	139	123	116	129	139	131	116	129	139		64	0.41	0.53	0.39	0.31	0.37	0.53	0.39	0.31	0.45	0.53	0.39	0.31		64	49	65	49	42	47	65	49
65	71.75				52.6				90.9					65	95	103	103	116	91	103	103	116	99	103	103	116		65	0.92	0.8	0.79	0.59	0.87	0.8	0.79	0.59	0.96	0.8	0.79	0.59		65	42.5	42	63	57	42	42	63
66	46.5			15	46.5			15	46.5			15		66	86	97	99	100	80	97	99	100	92	97	99	100		66	0.74	0.59	0.56	0.53	0.7	0.59	0.56	0.53	0.78	0.59	0.56	0.53		66	46.5	71	82.5	83	45	71	80
67	20.45	13.8	16.9	31.7	20.4	13.8	16.9	31.7	20.5	13.8	16.9	31.7		67	119.5	119	109	96	118	119	109	96	121	119	109	96		67	0.48	0.48	0.6	0.81	0.46	0.48	0.6	0.81	0.49	0.48	0.6	0.81		67	78	88	111	205	73	88	111
68	45.55	33.7	26.5	7.8	39.7	33.7	26.5	7.8	51.4	33.7	26.5	7.8		68	97.5	102	107	105	95	102	107	105	100	102	107	105		68	0.86	0.77	0.69	0.72	0.81	0.77	0.69	0.72	0.91	0.77	0.69	0.72		68	40	43	72	80	37	43	72
69	16.45		14.4	63.9	16		14.4	63.9	16.9		14.4	63.9		69	101.5	82	98	108	99	82	98	108	104	82	98	108		69	0.79	1.02	0.85	0.67	0.74	1.02	0.85	0.67	0.84	1.02	0.85	0.67		69	32.5	64	55	45	31	64	55
70	29.3	27.9	32.6		26.9	27.9	32.6		31.7	27.9	32.6			70	55	44	45		47	44	45		63	44	45			70	1.45	1.71	1.7		1.28	1.71	1.7		1.62	1.71	1.7			70	73.5	85	87		66	85	87
71	224		19.8	15	224		19.8	15	224		19.8	15		71	30	65	80	82	29	65	80	82	31	65	80	82		71	2.5	1.32	1.11	1.08	2.45	1.32	1.11	1.08	2.55	1.32	1.11	1.08		71	101	83	125	95	99	83	125
72	33.4	14.3	11.5		22.5	14.3	11.5		44.3	14.3	11.5			72	152.5	149	149	146	131	149	149	146	174	149	149	146		72	0.51	0.5	0.5	0.52	0.34	0.5	0.5	0.52	0.68	0.5	0.5	0.52		72	27	39	37	63	22	39	37
73	28.3	11.6		11.2	22	11.6		11.2	34.6	11.6		11.2		73	85	85	78	75	79	85	78	75	91	85	78	75		73	0.98	0.98	1.05	1.08	0.92	0.98	1.05	1.08	1.04	0.98	1.05	1.08		73	39.5	67	99	102	35	67	99
74	33.25	11.1	8.6	8.3	25.9	11.1	8.6	8.3	40.6	11.1	8.6	8.3		74	96.5	92	105	108	96	92	105	108	97	92	105	108		74	0.88	0.93	0.72	0.67	0.87	0.93	0.72	0.67	0.89	0.93	0.72	0.67		74	32.5	54	62	57	30	54	62
75	15.2		7.4	10.6	12.6		7.4	10.6	17.8		7.4	10.6		75	87.5	108	100	93	82	108	100	93	93	108	100	93		75	1.02	0.77	0.91	0.96	0.97	0.77	0.91	0.96	1.07	0.77	0.91	0.96		75	48.5	39	59	56	46	39	59
76	50.15				45.4				54.9					76	107.5	109	116	124	106	109	116	124	109	109	116	124		76	0.64	0.62	0.53	0.45	0.61	0.62	0.53	0.45	0.66	0.62	0.53	0.45		76	44	43	23	42	42	43	23
77	21.3	14.9	11.9	16.8	19.6	14.9	11.9	16.8	23	14.9	11.9	16.8		77	116	119	115	113	115	119	115	113	117	119	115	113		77	0.5	0.47	0.51	0.54	0.49	0.47	0.51	0.54	0.51	0.47	0.51	0.54		77	53.5	49	57	68	49	49	57
78	9.2		8.3	5.8	9.2		8.3	5.8	9.2		8.3	5.8		78	101	105	104	112	101	105	104	112	101	105	104	112		78	0.81	0.74	0.77	0.64	0.81	0.74	0.77	0.64	0.81	0.74	0.77	0.64		78	20	28	39	42	20	28	39
79	5.7	5.2	5.7	8.2	5.7	5.2	5.7	8.2	5.7	5.2	5.7	8.2		79	84.5	88	113	120	83	88	113	120	86	88	113	120		79	0.86	0.83	0.62	0.52	0.85	0.83	0.62	0.52	0.87	0.83	0.62	0.52		79	26	64	73	67	23	64	73
80	37.6		16.7	30.1	37.6		16.7	30.1	37.6		16.7	30.1		80	89	93	99	93	89	93	99	93	89	93	99	93		80	0.79	0.71	0.61	0.72	0.79	0.71	0.61	0.72	0.79	0.71	0.61	0.72		80	61	55	47	66	61	55	47
81	66.6				66.6				66.6					81	78	78	70	88	78	78	70	88	78	78	70	88		81	0.83	0.83	0.91	0.75	0.83	0.83	0.91	0.75	0.83	0.83	0.91	0.75		81	32	34	52	58	32	34	52
82	46.3		40.9	11.5	46.3		40.9	11.5	46.3		40.9	11.5		82	99	99	101	108	99	99	101	108	99	99	101	108		82	0.78	0.79	0.76	0.64	0.78	0.79	0.76	0.64	0.78	0.79	0.76	0.64		82	39	36	36	67	39	36	36
83	111.1	66.2	81.5	41.4	71.2	66.2	81.5	41.4	151	66.2	81.5	41.4		83	110	105	107	110	104	105	107	110	116	105	107	110		83	0.52	0.58	0.55	0.51	0.45	0.58	0.55	0.51	0.59	0.58	0.55	0.51		83	37	48	48	63	34	48	48
84	18.95		12.1	8.5	17.5		12.1	8.5	20.4		12.1	8.5		84	90.5	101	102	112	88	101	102	112	93	101	102	112		84	0.92	0.73	0.71	0.56	0.89	0.73	0.71	0.56	0.94	0.73	0.71	0.56		84	46.5	28	20	72	46	28	20
85	11.13		12.8	20.8	10.7		12.8	20.8	11.5		12.8	20.8		85	116.33	116	114	118	113	116	114	118	119	116	114	118		85	0.49	0.49	0.51	0.47	0.46	0.49	0.51	0.47	0.53	0.49	0.51	0.47		85	34	36	26	54	31	36	26
86	85.25		62.7	31.5	70.5		62.7	31.5	100		62.7	31.5		86	28	24	33	56	26	24	33	56	30	24	33	56		86	2.51	2.84	2.17	1.39	2.36	2.84	2.17	1.39	2.65	2.84	2.17	1.39		86	138	184	152	165	127	184	152
87	40.3		16		40.3		16		40.3		16			87	61.5	92	98	112	53	92	98	112	70	92	98	112		87	1.27	0.87	0.75	0.55	1.12	0.87	0.75	0.55	1.42	0.87	0.75	0.55		87	47	63	66	42	41	63	66
88	27.3		12.7	8.8	24		12.7	8.8	30.6		12.7	8.8		88	108	107	114	112	106	107	114	112	110	107	114	112		88	0.77	0.78	0.68	0.7	0.73	0.78	0.68	0.7	0.81	0.78	0.68	0.7		88	44	38	54	34	42	38	54
89	11.7	16.3	23.5	19.7	9.8	16.3	23.5	19.7	12.8	16.3	23.5	19.7		89	120	111	113	128	118	111	113	128	123	111	113	128		89	0.36	0.46	0.44	0.3	0.34	0.46	0.44	0.3	0.38	0.46	0.44	0.3		89	67	61	55	37	66	61	55
90		22.8	30.5	20.2		22.8	30.5	20.2		22.8	30.5	20.2		90	97	101	103	124	97	101	103	124	97	101	103	124		90	0.77	0.7	0.67	0.43	0.77	0.7	0.67	0.43	0.77	0.7	0.67	0.43		90	100	85	86	48	100	85	86
91	53.3		39.8		53.3		39.8		53.3		39.8			91	27	26	41	98.5	27	26	41	97	27	26	41	100		91	2.59	2.65	1.84	0.86	2.59	2.65	1.84	0.82	2.59	2.65	1.84	0.89		91	113	154	157	60	113	154	157
92	37.7		18.4		34.4		18.4		41		18.4			92	30.5	39	34	46	26	39	34	46	35	39	34	46		92	2.34	1.86	2.1	1.61	2.04	1.86	2.1	1.61	2.63	1.86	2.1	1.61		92	126	92	99	72	111	92	99
93	111	54	51.2		111	54	51.2		111	54	51.2			93	27	28	21		24	28	21		30	28	21			93	2.67	2.57	3.18		2.42	2.57	3.18		2.92	2.57	3.18			93	123.5	148	177		112	148	177
94	14.5				14.5				14.5					94	84	63	66	33	82	63	66	33	86	63	66	33		94	0.98	1.25	1.2	2.15	0.96	1.25	1.2	2.15	1	1.25	1.2	2.15		94	52.5	67	96	133	52	67	96
95	26	15.3			26	15.3			26	15.3				95	99	92	94	114	99	92	94	114	99	92	94	114		95	0.67	0.79	0.75	0.47	0.67	0.79	0.75	0.47	0.67	0.79	0.75	0.47		95	56	62	88	85	56	62	88
96	55.6		40.5	44.4	55.6		40.5	44.4	55.6		40.5	44.4		96	34.5	18	47		32	18	47		37	18	47			96	1.55	2.65	1.19		1.46	2.65	1.19		1.64	2.65	1.19			96	129	181	86	102	127	181	86
97	34.65		34	129	34.6		34	129	34.7		34	129		97	82	70	74	65	80	70	74	65	83	70	74	65		97	0.96	1.09	1.05	1.16	0.95	1.09	1.05	1.16	0.98	1.09	1.05	1.16		97	40.33	47	57	86	40	47	57
98	20.2		13.8	16.2	19.1		13.8	16.2	21.3		13.8	16.2		98	116	118	111	116	116	118	111	116	116	118	111	116		98	0.4	0.38	0.45	0.4	0.4	0.38	0.45	0.4	0.4	0.38	0.45	0.4		98	44	56	57	52	37	56	57
99	43.1	26.5	39	29.9	39.4	26.5	39	29.9	46.8	26.5	39	29.9		99	113.5	117	124	140	113	117	124	140	114	117	124	140		99	0.62	0.57	0.5	0.37	0.61	0.57	0.5	0.37	0.62	0.57	0.5	0.37		99	62.5	73	74	59	58	73	74
100		12.8		12.9		12.8		12.9		12.8		12.9		100	104	109	109	102	104	109	109	102	104	109	109	102		100	0.67	0.61	0.61	0.71	0.67	0.61	0.61	0.71	0.67	0.61	0.61	0.71		100	47	38	54	88	47	38	54
101	9.9	9.9		23.8	9.8	9.9		23.8	10	9.9		23.8		101	109	107	110	104	107	107	110	104	111	107	110	104		101	0.59	0.63	0.57	0.69	0.56	0.63	0.57	0.69	0.62	0.63	0.57	0.69		101	28.5	59	51	61	25	59	51
102	57.8	34.3	24.1	12.7	57.8	34.3	24.1	12.7	57.8	34.3	24.1	12.7		102	85	101	105	118	85	101	105	118	85	101	105	118		102	1.01	0.82	0.74	0.56	1.01	0.82	0.74	0.56	1.01	0.82	0.74	0.56		102	89	93	91	56	89	93	91
103	70.8	51.5		23.4	70.8	51.5		23.4	70.8	51.5		23.4		103	78	86	86	101	78	86	86	101	78	86	86	101		103	1.05	0.97	0.97	0.75	1.05	0.97	0.97	0.75	1.05	0.97	0.97	0.75		103	46	85	115	75	46	85	115
104	12.3	13.2	9.8	38.8	12.3	13.2	9.8	38.8	12.3	13.2	9.8	38.8		104	100	104	113	110	100	104	113	110	100	104	113	110		104	0.7	0.64	0.53	0.56	0.7	0.64	0.53	0.56	0.7	0.64	0.53	0.56		104	93	75	65	77	93	75	65
105	233		92.4	79	233		92.4	79	233		92.4	79		105	26	31	35	41	26	31	35	41	26	31	35	41		105	2.49	2.15	1.92	1.7	2.49	2.15	1.92	1.7	2.49	2.15	1.92	1.7		105	96	131	112	64	96	131	112
106	40.05	15.4		9.3	25.8	15.4		9.3	54.3	15.4		9.3		106	110.5	111	105	101	108	111	105	101	113	111	105	101		106	0.67	0.65	0.75	0.81	0.63	0.65	0.75	0.81	0.7	0.65	0.75	0.81		106	53	70	104	124	51	70	104
107	5.8		10.2	36.5	4.7		10.2	36.5	6.9		10.2	36.5		107	69	95	97	104	68	95	97	104	70	95	97	104		107	1.12	0.79	0.74	0.63	1.11	0.79	0.74	0.63	1.13	0.79	0.74	0.63		107	66.5	45	40	57	63	45	40
108	171.5				165				178					108	14.5				14				15					108	4.59				4.49				4.69					108	113.5				113
109	6.55		5.2		6.1		5.2		7		5.2			109	101	69	51	52	98	69	51	52	104	69	51	52		109	0.69	0.97	1.23	1.22	0.65	0.97	1.23	1.22	0.72	0.97	1.23	1.22		109	29	75	124	91	28	75	124
110		34.4	84.9	163		34.4	84.9	163		34.4	84.9	163		110	65	45	31	53	65	45	31	53	65	45	31	53		110	1.15	1.56	2.13	1.35	1.15	1.56	2.13	1.35	1.15	1.56	2.13	1.35		110	124	155	209	83	124	155	209
111	77.6	45.3	25.2	19.8	77.6	45.3	25.2	19.8	77.6	45.3	25.2	19.8		111	76	71	67	58	76	71	67	58	76	71	67	58		111	0.89	0.94	0.98	1.11	0.89	0.94	0.98	1.11	0.89	0.94	0.98	1.11		111	75	102	104	142	75	102	104
112	83.6	64.8	60.1	59.5	83.6	64.8	60.1	59.5	83.6	64.8	60.1	59.5		112	16	54	88	86	16	54	88	86	16	54	88	86		112	3.71	1.32	0.85	0.9	3.71	1.32	0.85	0.9	3.71	1.32	0.85	0.9		112	117	56	59	102	117	56	59
113	28.3		6.3		25.7		6.3		30.9		6.3			113	107	90	115	128	99	90	115	128	115	90	115	128		113	0.9	1.06	0.82	0.63	0.82	1.06	0.82	0.63	0.98	1.06	0.82	0.63		113	31	64	58	45	30	64	58
114	14.55		28.1	9.1	11		28.1	9.1	18.1		28.1	9.1		114	80	91	95	120	75	91	95	120	85	91	95	120		114	1.1	0.98	0.95	0.6	1.04	0.98	0.95	0.6	1.15	0.98	0.95	0.6		114	36.5	50	59	42	34	50	59
115	33		13.3		33		13.3		33		13.3			115	74.33	96	83	109	69	95	83	109	83	97	83	109		115	1.15	0.93	1.04	0.71	1.04	0.92	1.04	0.71	1.21	0.93	1.04	0.71		115	30.67	45	81	68	28	45	81
116	59.5		29.2	34.5	59.5		29.2	34.5	59.5		29.2	34.5		116	106	72	99	99	102	72	99	99	110	72	99	99		116	0.63	1.09	0.73	0.73	0.57	1.09	0.73	0.73	0.68	1.09	0.73	0.73		116	74	118	120	108	71	118	120
117	8.15	5.5	12.5	7.5	6.9	5.5	12.5	7.5	9.4	5.5	12.5	7.5		117	77.33	69	65	128	69	69	65	128	82	69	65	128		117	1.19	1.29	1.37	0.58	1.12	1.29	1.37	0.58	1.3	1.29	1.37	0.58		117	35.67	72	106	63	33	72	106
118	70.2	87.2	74.6	52.9	57.1	87.2	74.6	52.9	83.3	87.2	74.6	52.9		118	30.67	48	31	53	26	48	31	53	33	48	31	53		118	2.17	1.49	2.14	1.37	2.01	1.49	2.14	1.37	2.47	1.49	2.14	1.37		118	65.33	32	63	110	62	32	63
119	50.27		12.4		36.5		12.4		57.2		12.4			119	103		104		102		104		104		104			119	0.49		0.48		0.47		0.48		0.5		0.48			119	47.33		54		47		54
120	22.7	16.7	25.3	47	18.6	16.7	25.3	47	26.8	16.7	25.3	47		120	114.5	83	27	26	113	83	27	26	116	83	27	26		120	0.81	1.13	2.84	2.95	0.78	1.13	2.84	2.95	0.84	1.13	2.84	2.95		120	19.5	30	85	133	19	30	85
121														121	96	97	84	121	95	97	84	121	97	97	84	121		121	0.89	0.87	1	0.51	0.87	0.87	1	0.51	0.91	0.87	1	0.51		121	92	97	118	67	92	97	118
122	10			20.6	10			20.6	10			20.6		122	95	84	80	80	95	84	80	80	95	84	80	80		122	0.8	0.96	1	1	0.8	0.96	1	1	0.8	0.96	1	1		122	72	70	69	95	72	70	69
123				15.7				15.7				15.7		123	90	95	95	93	90	95	95	93	90	95	95	93		123	0.83	0.73	0.73	0.77	0.83	0.73	0.73	0.77	0.83	0.73	0.73	0.77		123	82	54	50	60	82	54	50
124	115		55.3	43.2	115		55.3	43.2	115		55.3	43.2		124	34	52	50	93	32	52	50	93	36	52	50	93		124	2.13	1.49	1.55	0.92	2.02	1.49	1.55	0.92	2.24	1.49	1.55	0.92		124	118.5	134	139	100	115	134	139
125	16.25	31	31.4	47.8	15.3	31	31.4	47.8	17.2	31	31.4	47.8		125	141	136	135	123	140	136	135	123	142	136	135	123		125	0.38	0.41	0.42	0.52	0.37	0.41	0.42	0.52	0.38	0.41	0.42	0.52		125	37.5	27	28	32	30	27	28
126	20.4		11		19.4		11		20.9		11			126	23.5	24	29	63	23	24	29	63	24	24	29	63		126	2.66	2.68	2.26	1.2	2.61	2.68	2.26	1.2	2.7	2.68	2.26	1.2		126	94	148	174	114	89	148	174
127	19.3			34.4	19.3			34.4	19.3			34.4		127	89	89	78	94	89	89	78	94	89	89	78	94		127	0.72	0.72	0.8	0.65	0.72	0.72	0.8	0.65	0.72	0.72	0.8	0.65		127	67	70	65	54	67	70	65
128	20.25		44.4	53.2	17.5		44.4	53.2	23		44.4	53.2		128	96.5	107	100	81	96	107	100	81	97	107	100	81		128	0.87	0.68	0.8	1.02	0.85	0.68	0.8	1.02	0.89	0.68	0.8	1.02		128	75	54	44	78	74	54	44
129	20.3	9.2	12.4		20.3	9.2	12.4		20.3	9.2	12.4			129	46	55	55	74	46	55	55	74	46	55	55	74		129	1.67	1.46	1.46	1.13	1.67	1.46	1.46	1.13	1.67	1.46	1.46	1.13		129	92	70	73	86	92	70	73
[truncated: 161 more columns]

## Sheet: circulation
RR norepi (mg/h)	average				min				max						RR epi (mg/h)	average				min				max						RR VP/Argipressin (I.E./h)	average				min				max
Pat-Nr	0-24h	48-72h	96-120h	216-240h	0-24h	48-72h	96-120h	216-240h	0-24h	48-72h	96-120h	216-240h			Pat-Nr	0-24h	48-72h	96-120h	216-240h	0-24h	48-72h	96-120h	216-240h	0-24h	48-72h	96-120h	216-240h			Pat-Nr	0-24h	48-72h	96-120h	216-240h	0-24h	48-72h	96-120h	216-240h	0-24h	48-72h	96-120h	216-240h
1	0.22	0.29	0.57	0.39	0.1	0.1	0.45	0.1	0.5	0.5	0.6	0.5			1	0	0	0	0	0	0	0	0	0	0	0	0			1	0	0	0	0	0	0	0	0	0	0	0	0
2	0	0	0.04	0	0	0	0	0	0	0	0.05	0			2	0	0	0	0	0	0	0	0	0	0	0	0			2	0	0	0	0	0	0	0	0	0	0	0	0
3	0	0.01	0	0.14	0	0	0	0	0	0.2	0.4	0.6			3	0	0	0	0	0	0	0	0	0	0	0	0			3	0	0	0	0	0	0	0	0	0	0	0	0
4	0.07	0	0.08	0.26	0	0	0	0.1	0.1	0	0.2	0.4			4	0	0	0	0	0	0	0	0	0	0	0	0			4	0	0	0	0	0	0	0	0	0	0	0	0
5	0.25	0	0	0.02	0.1	0	0	0	0.65	0	0	0.1			5	0	0	0	0	0	0	0	0	0	0	0	0			5	0	0	0	0	0	0	0	0	0	0	0	0
6	0.16	0.1	0.04	0.01	0.1	0	0	0	0.2	0.2	0.2	0.05			6	0	0	0	0	0	0	0	0	0	0	0	0			6	0	0	0	0	0	0	0	0	0	0	0	0
7	0.59	0.28	0.55	0.52	0	0.2	0.4	0	1.2	0.35	0.8	3.1			7	0	0	0	0	0	0	0	0	0	0	0	0.05			7	0	0	0	0.9	0	0	0	0.5	0	0	0	1
8	0.61	0.24	0.17	0.31	0.3	0	0.15	0.2	1.5	0.4	0.2	0.35			8	0	0	0	0	0	0	0	0	0	0	0	0			8	0	0	0	0	0	0	0	0	0	0	0	0
9	0.39	0.06	0.11	0.4	0.11	0	0	0.4	1.5	0.1	0.2	0.4			9	0	0	0	0	0	0	0	0	0	0	0	0			9	0	0	0	0	0	0	0	0	0	0	0	0
10	0.06	0	0.08	0	0	0	0	0	0.3	0	0.3	0			10	0	0	0	0	0	0	0	0	0	0	0	0			10	0	0	0	0	0	0	0	0	0	0	0	0
11	0.16	0.08	0.25	0.35	0.1	0.05	0.1	0.3	0.3	0.1	0.6	0.4			11	0	0	0	0	0	0	0	0	0	0	0	0			11	0	0	0	0	0	0	0	0	0	0	0	0
12	0	0	0	0	0	0	0	0	0	0	0	0			12	0	0	0	0	0	0	0	0	0	0	0	0			12	0	0	0	0	0	0	0	0	0	0	0	0
13	0.91	0	0	0	0.3	0	0	0	2.9	0	0	0			13	0	0	0	0	0	0	0	0	0	0	0	0			13	0	0	0	0	0	0	0	0	0	0	0	0
14	0.06	0.08	0.09	1.11	0	0	0.05	1.1	0.3	0.1	0.2	1.2			14	0	0	0	0	0	0	0	0	0	0	0	0			14	0	0	0	0	0	0	0	0	0	0	0	0
15	0.06	0.03	0.02	0	0	0	0	0	0.2	0.2	0.2	0			15	0	0	0	0	0	0	0	0	0	0	0	0			15	1	0.84	0	0	1	0	0	0	1	1	0	0
16	0.53	0.13	0	0.06	0.3	0	0	0	1	0.15	0	0.2			16	0	0	0	0	0	0	0	0	0	0	0	0			16	0	0	0	0	0	0	0	0	0	0	0	0
17	0.08	0	0.04	0.15	0	0	0	0.1	0.2	0	0.3	0.3			17	0	0	0	0	0	0	0	0	0	0	0	0			17	0	0	0	0	0	0	0	0	0	0	0	0
18	0	0	0	0.14	0	0	0	0	0	0	0	0.4			18	0	0	0	0	0	0	0	0	0	0	0	0			18	0.23	0.03	0.46	0	0	0	0	0	1	0.5	0.8	0
19	0.45	0.38	0.32	0	0.7	0.3	0.3	0	0.3	0.4	0.4	0			19	0	0	0	0	0	0	0	0	0	0	0	0			19	0	0	0	0	0	0	0	0	0	0	0	0
20	0.38	0.01	0.07	0.13	0.3	0	0	0.1	0.5	0.1	0.2	0.15			20	0	0	0	0	0	0	0	0	0	0	0	0			20	0	0	0	0	0	0	0	0	0	0	0	0
21	0.24	0	0	0	0	0	0	0	1.2	0	0	0			21	0	0	0	0	0	0	0	0	0	0	0	0			21	0	0	0	0	0	0	0	0	0	0	0	0
22	0.36	0	0	0	0	0	0	0	0.8	0	0.05	0			22	0	0	0	0	0	0	0	0	0	0	0	0			22	0.61	0	0	0	0	0	0	0	1	0	0	0
23	0.89	0.32	0.13	0	0.4	0.2	0	0	1.4	0.4	0.3	0			23	0	0	0	0	0	0	0	0	0	0	0	0			23	0	0	0	0	0	0	0	0	0	0	0	0
24	0.85	0.4	0.22	0.12	0.7	0.4	0.1	0.1	0.9	0.4	0.3	0.2			24	0	0	0	0	0	0	0	0	0	0	0	0			24	0	0	0	0	0	0	0	0	0	0	0	0
25	0.2	0.05	0.21	0.07	0.15	0	0.2	0	0.4	0.1	0.3	0.2			25	0	0	0	0	0	0	0	0	0	0	0	0			25	0	0	0	0	0	0	0	0	0	0	0	0
26	0.28	0.07	0.42	0.31	0	0	0.2	0.15	0.4	0.2	0.5	0.45			26	0	0	0	0	0	0	0	0	0	0	0	0			26	0	0	0	0	0	0	0	0	0	0	0	0
27	0.76	0.12	0.09		0.4	0.1	0		1.1	0.3	0.1				27	0	0	0		0	0	0		0	0	0				27	0	0	0		0	0	0		0	0	0
28	0.35	0.01	0	0.02	0.2	0	0	0	0.5	0.1	0	0.1			28	0	0	0	0	0	0	0	0	0	0	0	0			28	0	0	0	0	0	0	0	0	0	0	0	0
29	0.23	0	0	0.21	0.15	0	0	0.1	0.4	0	0	0.3			29	0	0	0	0	0	0	0	0	0	0	0	0			29	0	0	0	0	0	0	0	0	0	0	0	0
30	0	0	0	0	0	0	0	0	0.1	0	0	0			30	0	0	0	0	0	0	0	0	0	0	0	0			30	0	0	0	0	0	0	0	0	0	0	0	0
31	0.27	0.23	0.19	0.2	0.1	0	0	0.2	0.45	0.35	0.5	0.3			31	0	0	0	0	0	0	0	0	0	0	0	0			31	0	0	0	0	0	0	0	0	0	0	0	0
32	0	0.08	0.1	0.19	0	0	0.05	0	0.1	0.2	0.1	0.4			32	0	0	0	0	0	0	0	0	0	0	0	0			32	0	0	0	0	0	0	0	0	0	0	0	0
33	0.01	0	0	0.2	0	0	0	0.15	0.4	0	0	0.2			33	0	0	0	0	0	0	0	0	0	0	0	0			33	0	0	0	0	0	0	0	0	0	0	0	0
34	0.16	0.02	0.19	0.48	0.1	0	0.1	0.4	0.3	0.1	0.2	0.7			34	0	0	0	0	0	0	0	0	0	0	0	0			34	0	0	0	0	0	0	0	0	0	0	0	0
35	0.23	0.1	0.35	0.22	0	0.1	0.05	0	0.7	0.1	0.4	0.7			35	0	0	0	0	0	0	0	0	0	0	0	0			35	0	0	0	0	0	0	0	0	0	0	0	0
36	0.24	0.34	0.22	0.26	0.2	0.25	0.2	0.2	0.4	0.5	0.3	0.4			36	0	0	0	0	0	0	0	0	0	0	0	0			36	0	0	0	0	0	0	0	0	0	0	0	0
37	0.26	0.06	0.12	0.19	0.1	0	0.1	0.1	0.4	0.1	0.15	0.2			37	0	0	0	0	0	0	0	0	0	0	0	0			37	0	0	0	0	0	0	0	0	0	0	0	0
38	0.21	0	0.13	0	0.1	0	0	0	0.3	0	0.4	0			38	0	0	0	0	0	0	0	0	0	0	0	0			38	0	0	0	0	0	0	0	0	0	0	0	0
39	0.94	0.39	0.17	0.2	0.4	0.3	0.1	0.15	2.8	0.6	0.2	0.2			39	0	0	0	0	0	0	0	0	0	0	0	0			39	0	0	0	0	0	0	0	0	0	0	0	0
40	0.49	0.12	0.12	0.01	0.1	0.1	0.05	0	1	0.15	0.15	0.1			40	0	0	0	0	0	0	0	0	0	0	0	0			40	0	0	0	0	0	0	0	0	0	0	0	0
41	0.04	0	0	0	0	0	0	0	0.5	0	0	0			41	0	0	0	0	0	0	0	0	0	0	0	0			41	0	0	0	0	0	0	0	0	0	0	0	0
42	0.06	0.06	0	0	0	0	0	0	0.2	0.1	0	0			42	0	0	0	0	0	0	0	0	0	0	0	0			42	0	0	0	0	0	0	0	0	0	0	0	0
43	0.13	0.19	0.26	0.13	0	0.05	0.2	0	0.2	0.3	0.5	0.4			43	0	0	0	0	0	0	0	0	0	0	0	0			43	0	0	0	0	0	0	0	0	0	0	0	0
44	0.01	0	0.02	0	0	0	0	0	0.1	0	0.1	0			44	0	0	0	0	0	0	0	0	0	0	0	0			44	0	0	0	0	0	0	0	0	0	0	0	0
45	0.31	0.29	0.15	0.43	0.2	0.1	0	0.2	0.9	0.4	0.3	0.9			45	0	0	0	0	0	0	0	0	0	0	0	0			45	0	0	0	0	0	0	0	0	0	0	0	0
46	0.42	0.51	0.5	0.33	0.2	0.45	0.4	0.1	0.5	0.7	0.6	0.4			46	0	0	0	0	0	0	0	0	0	0	0	0			46	0	0	0	0	0	0	0	0	0	0	0	0
47	1.31	0.1	0.02	0.2	1.6	0	0	0.1	7.6	0.3	0.2	0.4			47	0	0	0	0	0	0	0	0	0	0	0	0			47	0.52	0	0	0	0	0	0	0	2	0	0	0
48	0.34	0.35	0.15	0.6	0.2	0.2	0	0.4	0.8	0.6	0.2	0.8			48	0	0	0	0	0	0	0	0	0	0	0	0			48	0.37	0	0	0	0	0	0	0	2	0	0	0
49	0	0	0	0.02	0	0	0	0	0	0	0	0.1			49	0	0	0	0	0	0	0	0	0	0	0	0			49	0	0	0	0	0	0	0	0	0	0	0	0
50	0.3	0	0	0.03	0	0	0	0	0.4	0	0	0.1			50	0	0	0	0	0	0	0	0	0	0	0	0			50	0	0	0	0	0	0	0	0	0	0	0	0
51	0.82	0.1	0	0.19	0.5	0	0	0.015	1	0.4	0	0.3			51	0	0	0	0	0	0	0	0	0	0	0	0			51	0	0	0	0	0	0	0	0	0	0	0	0
52	0.3	0.3	0.3	0.3	0.3	0.3	0.3	0.3	0.3	0.3	0.3	0.3			52	0	0	0	0	0	0	0	0	0	0	0	0			52	0	0	0	0	0	0	0	0	0	0	0	0
53	1.37	0.63	0.1	0	0.7	0.38	0	0	2.2	0.9	0.3	0			53	0	0	0	0	0	0	0	0	0	0	0	0			53	0	0	0	0	0	0	0	0	0	0	0	0
54	0.47	0	0	0	0.4	0	0	0	1.2	0	0	0			54	0	0	0	0	0	0	0	0	0	0	0	0			54	0	0	0	0	0	0	0	0	0	0	0	0
55	0	0	0.5	0.11	0	0	0.4	0	0.1	0	0.6	0.2			55	0	0	0	0	0	0	0	0	0	0	0	0			55	0	0	0	0	0	0	0	0	0	0	0	0
56	0.2	0.15	0.1	0.02	0	0	0	0	0.7	0.3	0.4	0.2			56	0	0	0	0	0	0	0	0	0	0	0	0			56	0	0	0	0	0	0	0	0	0	0	0	0
57	0.07	0.01	0.2	0.04	0	0	0	0	0.2	0.05	0.4	0.2			57	0	0	0	0	0	0	0	0	0	0	0	0			57	0	0	0	0	0	0	0	0	0	0	0	0
58	0	0	0	0	0	0	0	0	0	0	0.1	0			58	0	0	0	0	0	0	0	0	0	0	0	0			58	0	0	0	0	0	0	0	0	0	0	0	0
59	0.18	0.07	0	0.16	0.1	0	0	0	0.2	0.2	0	0.5			59	0	0	0	0	0	0	0	0	0	0	0	0			59	0	0	0	0	0	0	0	0	0	0	0	0
60	0.13	0.01	0.04	0.11	0	0	0	0.03	0.3	0.1	0.25	0.3			60	0	0	0	0	0	0	0	0	0	0	0	0			60	0	0	0	0	0	0	0	0	0	0	0	0
61	0.25	0	0.01	0	0	0	0	0	0.82	0.05	0.2	0			61	0	0	0	0	0	0	0	0	0	0	0	0			61	0	0	0	0	0	0	0	0	0	0	0	0
62	0.25	0.12	0	0	0.1	0.05	0	0	0.7	0.2	0.15	0			62	0	0	0	0	0	0	0	0	0	0	0	0			62	0	0	0	0	0	0	0	0	0	0	0	0
63	0.15	0	0	0.02	0.1	0	0	0	0.3	0	0	0.1			63	0	0	0	0	0	0	0	0	0	0	0	0			63	0	0	0	0	0	0	0	0	0	0	0	0
64	0.74	0.2	0.1	0.02	0.6	0.1	0	0	1	0.3	0.1	0.05			64	0	0	0	0	0	0	0	0	0	0	0	0			64	0	0	0	0	0	0	0	0	0	0	0	0
65	0.36	0.09	0.01	0.02	0.15	0	0	0	0.6	0.1	0.2	0.2			65	0	0	0	0	0	0	0	0	0	0	0	0			65	0.82	0	0	0	0.5	0	0	0	1.5	0	0	0
66	0.36	0.08	0	0.01	0.1	0.05	0	0	0.6	0.15	0	0.3			66	0	0	0	0	0	0	0	0	0	0	0	0			66	0	0	0	0	0	0	0	0	0	0	0	0
67	0.01	0.1	0.29	0.42	0	0.05	0.2	0.2	0.1	0.3	0.35	0.7			67	0	0	0	0	0	0	0	0	0	0	0	0			67	0	0	0	0	0	0	0	0	0	0	0	0
68	0.16	0.09	0.07	0	0	0	0.03	0	0.4	0.3	0.1	0			68	0	0	0	0	0	0	0	0	0	0	0	0			68	0	0	0	0	0	0	0	0	0	0	0	0
69	0.31	0.1	0	0.3	0.25	0	0	0.2	0.4	0.1	0	0.4			69	0	0	0	0	0	0	0	0	0	0	0	0			69	0	0	0	0	0	0	0	0	0	0	0	0
70	0	0	0		0	0	0		0	0	0				70	0	0	0		0	0	0		0	0	0				70	0	0	0		0	0	0		0	0	0
71	0.86	0.2	0	0.38	0.8	0.1	0	0.2	1.2	0.3	0	0.4			71	0	0	0	0	0	0	0	0	0	0	0	0			71	0	0	0	0	0	0	0	0	0	0	0	0
72	0.15	0	0.11	0.12	0	0	0	0	0.8	0	1.1	0.25			72	0	0	0	0	0	0	0	0	0	0	0	0			72	0	0	0	0	0	0	0	0	0	0	0	0
73	0.14	0	0.08	0.02	0	0	0	0	0.5	0	0.2	0.05			73	0	0	0	0	0	0	0	0	0	0	0	0			73	0	0	0	0	0	0	0	0	0	0	0	0
74	0.62	0	0	0	0.3	0	0	0	0.9	0	0	0			74	0	0	0	0	0	0	0	0	0	0	0	0			74	0	0	0	0	0	0	0	0	0	0	0	0
75	0	0	0	0	0	0	0	0	0	0	0	0			75	0	0	0	0	0	0	0	0	0	0	0	0			75	0	0	0	0	0	0	0	0	0	0	0	0
76	0.06	0.18	0.51	0.01	0	0.1	0.45	0	0.2	0.4	0.6	0.05			76	0	0	0	0	0	0	0	0	0	0	0	0			76	0	0	0	0	0	0	0	0	0	0	0	0
77	0.32	0	0.09	0.02	0.2	0	0	0	0.7	0	0.25	0.2			77	0	0	0	0	0	0	0	0	0	0	0	0			77	0	0	0	0	0	0	0	0	0	0	0	0
78	0.29	0	0.14	0.3	0.1	0	0.1	0.2	0.41	0	0.3	0.3			78	0	0	0	0	0	0	0	0	0	0	0	0			78	0	0	0	0	0	0	0	0	0	0	0	0
79	0.14	0.05	0.03	0	0	0	0	0	0.4	0.3	0.1	0			79	0	0	0	0	0	0	0	0	0	0	0	0			79	0	0	0	0	0	0	0	0	0	0	0	0
80	0.24	0.25	0.03	0.02	0.1	0.15	0	0	0.5	0.9	0.1	0.1			80	0	0	0	0	0	0	0	0	0	0	0	0			80	0	0	0	0	0	0	0	0	0	0	0	0
81	0.62	0.28	0.1	0	0.2	0.1	0	0	1.1	0.3	0.3	0			81	0	0	0	0	0	0	0	0	0	0	0	0			81	0.68	0.71	0.5	0	0	0.5	0	0	1	1	0.5	0
82	0.46	0.35	0.19	0.06	0.2	0.2	0.1	0	1	0.5	0.3	0.2			82	0	0	0	0	0	0	0	0	0	0	0	0			82	0.12	0	0	0	0	0	0	0	1	0	0	0
83	0.1	0.02	0	0	0	0	0	0	0.4	0.05	0.03	0			83	0	0	0	0	0	0	0	0	0	0	0	0			83	0	0	0	0	0	0	0	0	0	0	0	0
84	0.6	0.28	0.31	0.03	0.4	0.2	0.15	0	1.2	0.3	0.4	0.3			84	0	0	0	0	0	0	0	0	0	0	0	0			84	0	0	0	0	0	0	0	0	0	0	0	0
85	0	0	0.01	0	0	0	0	0	0	0	0.3	0			85	0	0	0	0	0	0	0	0	0	0	0	0			85	0	0	0	0	0	0	0	0	0	0	0	0
86	0.15	0.18	0.04	0	0	0	0	0	0.2	0.3	0.2	0			86	0	0	0	0	0	0	0	0	0	0	0	0			86	0	0	0	0	0	0	0	0	0	0	0	0
87	0.96	0.13	0	0	0.4	0.1	0	0	2	0.2	0	0			87	0	0	0	0	0	0	0	0	0	0	0	0			87	0.15	0	0	0	0	0	0	0	1	0	0	0
88	0.25	0	0	0	0.2	0	0	0	0.4	0	0	0			88	0	0	0	0	0	0	0	0	0	0	0	0			88	0	0	0	0	0	0	0	0	0	0	0	0
89	0	0.03	0.04	0.02	0	0	0	0	0	0.2	0.2	0.2			89	0	0	0	0	0	0	0	0	0	0	0	0			89	0	0	0	0	0	0	0	0	0	0	0	0
90	0.01	0	0	0	0	0	0	0	0.2	0	0	0			90	0	0	0	0	0	0	0	0	0	0	0	0			90	0	0	0	0	0	0	0	0	0	0	0	0
91	0.36	0	0	0.7	0.1	0	0	0.2	0.9	0	0	1.3			91	0	0	0	0	0	0	0	0	0	0	0	0			91	0	0	0	0	0	0	0	0	0	0	0	0
92	0.11	0.21	0.08	0.13	0	0.1	0	0	0.3	0.4	0.25	0.15			92	0	0	0	0	0	0	0	0	0	0	0	0			92	0	0	0	0	0	0	0	0	0	0	0	0
93	0.03	0	0.08		0	0	0		0.2	0	0.5				93	0	0	0		0	0	0		0	0	0				93	0	0	0		0	0	0		0	0	0
94	0.46	0.38	0.03	2.93	0.2	0.2	0	1.1	0.7	0.8	0.2	4			94	0	0	0	0	0	0	0	0	0	0	0	0			94	0	0	0	1.75	0	0	0	1	0	0	0	2
95	0.08	0	0	0	0	0	0	0	0.8	0	0	0			95	0	0	0	0	0	0	0	0	0	0	0	0			95	0	0	0	0	0	0	0	0	0	0	0	0
96	0.12	0.06	0.44	0	0	0	0.2	0	0.4	0.3	0.9	0.2			96	0	0	0	0	0	0	0	0	0	0	0	0			96	0	0	0	0	0	0	0	0	0	0	0	0
97	0.25	0.12	0.13	1.07	0	0	0	0.8	0.5	0.3	0.5	1.3			97	0	0	0	0	0	0	0	0	0	0	0	0			97	0	0	0	0	0	0	0	0	0	0	0	0
98	0.16	0.15	0.1	0.04	0	0.1	0.1	0	0.2	0.2	0.1	0.2			98	0	0	0	0	0	0	0	0	0	0	0	0			98	0	0	0	0	0	0	0	0	0	0	0	0
99	0.47	0.38	0.48	0.54	0.4	0.35	0.4	0.4	0.7	0.45	0.6	0.7			99	0	0	0	0	0	0	0	0	0	0	0	0			99	0	0	0	0	0	0	0	0	0	0	0	0
100	0.34	0.16	0.08	0	0.2	0	0	0	0.7	0.3	0.2	0			100	0	0	0	0	0	0	0	0	0	0	0	0			100	0	0	0	0	0	0	0	0	0	0	0	0
101	0.11	0.03	0	0.45	0	0	0	0	0.2	0.2	0.1	0.7			101	0	0	0	0	0	0	0	0	0	0	0	0			101	0	0	0	0	0	0	0	0	0	0	0	0
102	0.01	0.07	0.05	0.08	0	0.05	0	0	0.1	0.15	0.1	0.15			102	0	0	0	0	0	0	0	0	0	0	0	0			102	0	0	0	0	0	0	0	0	0	0	0	0
103	0.83	0.11	0.17	0.12	0.6	0	0.1	0	1.2	0.3	0.3	0.3			103	0	0	0	0	0	0	0	0	0	0	0	0			103	0	0	0	0	0	0	0	0	0	0	0	0
104	0	0.01	0	0.01	0	0	0	0	0.1	0.05	0	0.1			104	0	0	0	0	0	0	0	0	0	0	0	0			104	0	0	0	0	0	0	0	0	0	0	0	0
105	0.73	0.2	0.24	0.37	0.5	0.15	0.1	0.3	1.1	0.25	0.4	0.5			105	0.1	0	0	0	0.1	0	0	0	0.1	0	0	0			105	1	0.28	0	0	1	0	0	0	1	0.5	0	0
106	0.14	0.02	0.06	0	0	0	0	0	0.4	0.15	0.1	0.02			106	0	0	0	0	0	0	0	0	0	0	0	0			106	0	0	0	0	0	0	0	0	0	0	0	0
107	0.37	0.73	1.3	1.07	0.1	0.45	0.9	0.4	0.5	1	1.5	1.5			107	0	0	0	0	0	0	0	0	0	0	0	0			107	0	0	0.1	0	0	0	0	0	0	0	1	0
108	0.09				0				0.2						108	0				0				0						108	0				0				0
109	0	0	0	0.25	0	0	0	0.2	0.2	0	0	0.3			109	0	0	0	0	0	0	0	0	0	0	0	0			109	0	0	0	0	0	0	0	0	0	0	0	0
110	0	0.07	1.06	0.03	0	0	0.9	0	0	0.5	1.5	0.1			110	0	0	0	0	0	0	0	0	0	0	0	0			110	0	0	1.97	1	0	0	1	1	0	0	2	1
111	0.16	0	0.02	0.09	0	0	0	0	0.3	0	0.1	0.3			111	0	0	0	0	0	0	0	0	0	0	0	0			111	0	0	0	0	0	0	0	0	0	0	0	0
112	0.17	0	0.02	0.38	0	0	0	0.3	0.3	0	0.2	0.6			112	0	0	0	0	0	0	0	0	0	0	0	0			112	0.36	0	0	0	0	0	0	0	1	0	0	0
113	0.17	0.06	0	0	0.1	0	0	0	0.4	0.2	0	0			113	0	0	0	0	0	0	0	0	0	0	0	0			113	0	0	0	0	0	0	0	0	0	0	0	0
114	0.1	0	0	0.01	0	0	0	0	0.3	0	0	0.1			114	0	0	0	0	0	0	0	0	0	0	0	0			114	0	0	0	0	0	0	0	0	0	0	0	0
115	0.89	0.18	0.13	0.16	0.2	0.1	0	0	1.9	0.25	0.2	0.7			115	0	0	0	0	0	0	0	0	0	0	0	0			115	0.74	0	0	0	0	0	0	0	1	0	0	0
116	0.22	0	0	0.51	0	0	0	0.4	0.7	0.1	0	0.7			116	0	0	0	0	0	0	0	0	0	0	0	0			116	0	0	0	0	0	0	0	0	0	0	0	0
117	0.42	0.01	0	0	0.2	0	0	0	0.7	0.1	0	0			117	0	0	0	0	0	0	0	0	0	0	0	0			117	0	0	0	0	0	0	0	0	0	0	0	0
118	0.1	0.6	1.42	0.78	0	0.5	1.1	0.6	0.3	1.3	1.7	0.9			118	0.1	0.1	0.1	0.1	0.1	0.05	0.1	0.1	0.1	0.1	0.1	0.1			118	0	0	1	0.5	0	0	1	0.5	0	0	1	0.5
119	0.49	0.48	0.53	0	0.1	0.25	0.4	0	0.8	0.65	0.55	0			119	0	0	0	0	0	0	0	0	0	0	0	0			119	0	0	0	0	0	0	0	0	0	0	0	0
120	0.13	0.36	0.17	0.73	0	0	0.1	0.3	0.25	0.5	0.3	0.9			120	0	0	0	0	0	0	0	0	0	0	0	0			120	0	0	0	0	0	0	0	0	0	0	0	0
121	0.1	0	0.09	0	0	0	0	0	0.4	0	0.2	0			121	0	0	0	0	0	0	0	0	0	0	0	0			121	0	0	0	0	0	0	0	0	0	0	0	0
122	0.12	0.15	0.01	0	0	0	0	0	0.3	0.3	0.2	0			122	0	0	0	0	0	0	0	0	0	0	0	0			122	0	0	0	0	0	0	0	0	0	0	0	0
123	0.3	0.23	0.08	0.15	0.1	0.1	0	0.05	0.6	0.4	0.3	0.6			123	0	0	0	0	0	0	0	0	0	0	0	0			123	0.56	0	0	0	0	0	0	0	1	0	0	0
124	0.66	0.17	0.08	0.1	0.2	0.1	0	0.05	3.6	0.3	0.2	0.2			124	0	0	0	0	0	0	0	0	0	0	0	0			124	0.9	0.91	1	1	0.5	0.5	1	1	1	1	1	1
125	0.4	0.33	0.16	0.07	0	0.2	0	0	0.6	0.4	0.2	0.2			125	0	0	0	0	0	0	0	0	0	0	0	0			125	0	0	0	0	0	0	0	0	0	0	0	0
126	0.24	0.19	0.04	0.08	0.2	0.1	0	0	0.4	0.25	0.1	0.4			126	0	0	0	0	0	0	0	0	0	0	0	0			126	0	0	0	0	0	0	0	0	0	0	0	0
127	0.38	0.18	0.61	0.39	0.1	0	0.2	0.2	0.75	0.4	1.3	1.01			127	0	0	0	0	0	0	0	0	0	0	0	0			127	0	0	0	0	0	0	0	0	0	0	0	0
128	0.89	0.49	0.79	0.43	0.6	0.3	0.4	0.35	1	0.9	1	0.45			128	0	0	0	0	0	0	0	0	0	0	0	0			128	0	0	0	0	0	0	0	0	0	0	0	0
129	0	0	0	0	0	0	0	0	0	0	0	0			129	0	0	0	0	0	0	0	0	0	0	0	0			129	0	0	0	0	0	0	0	0	0	0	0	0
MAP (mmHg)	average				min				max						HR (1/min)	average				min				max
Pat-Nr	0-24h	48-72h	96-120h	216-240h	0-24h	48-72h	96-120h	216-240h	0-24h	48-72h	96-120h	216-240h			Pat-Nr	0-24h	48-72h	96-120h	216-240h	0-24h	48-72h	96-120h	216-240h	0-24h	48-72h	96-120h	216-240h
1	84.44	73.92	70.37	73.23	69	57	58	49	116	99	84	103			1	62.44	63.99	67.68	63.34	57	60	62	57	75	74	70	78
2	71.75	77.29	76.53	82.59	62	66	64	69	98	100	123	106			2	70.2	65.12	67.24	61.7	63	58	61	53	83	78	94	78
3	98.3	72.98	75.26	69.36	73	65	66	48	127	83	95	82			3	64.75	74.56	85.12	89.42	56	66	80	85	100	89	96	92
4	77.09	85.91	77.89	80.68	70	77	63	67	85	96	99	161			4	89.77	90.78	91.95	67.5	85	86	81	65	101	96	105	70
5	77.67	85.98	90.1	81.47	57	69	77	56	118	99	118	100			5	80.51	65.97	66.95	82.89	67	62	60	77	93	72	80	89
6	87.91	85.61	75.63	83.51	65	76	57	69	142	116	96	105			6	85.57	73.22	77.85	67.63	71	68	68	64	91	82	117	74
7	71.78	74.41	73.78	72.74	65	69	66	65	89	87	78	90			7	83.35	68.13	102.12	93.32	79	64	87	85	95	73	125	105
8	70.91	80.78	68.5	81.81	36	60	45	74	125	113	91	91			8	64.3	60.35	56.14	55.41	54	52	48	48	76	71	74	68
9	72.93	75.28	70.91	73.15	53	67	64	65	107	87	79	80			9	80.92	66.22	76.87	83.29	75	62	74	79	110	72	84	89
10	74.88	75.33	78.58	66.64	52	61	55	57	93	85	95	86			10	87.99	73.46	68.02	64.47	70	67	64	61	104	84	74	69
11	77.97	79.54	82.51	93.89	66	71	61	76	121	88	99	137			11	71.31	70.09	77.01	93.53	64	67	74	87	77	75	81	104
12	66.31	88.47	92.64	78.22	60	69	71	58	83	106	109	115			12	59.46	83.98	73.37	66.07	53	57	61	55	65	116	97	85
13	82.39	85.25	92.16	80.83	69	67	79	66	116	100	120	101			13	96.57	74.92	55.68	61.98	79	66	53	55	169	88	59	69
14	71.49	73.1	67.48	57.53	59	59	56	45	93	82	81	70			14	110.88	114.53	103.67	103.06	89	97	96	97	139	129	129	108
15	68.46	78.45	87.72	79.66	52	61	67	61	98	104	108	92			15	80.26	103.21	81.99	70.83	72	88	71	62	92	139	96	79
16	80.65	78.56	71.99	81.56	54	65	62	64	108	89	88	125			16	72.48	47.39	68.05	72.48	55	41	55	58	91	58	79	106
17	74.9	88.96	76.44	68.94	63	62	63	59	90	136	88	92			17	71.48	65.55	78.89	79.84	55	51	72	76	77	75	84	85
18	80.37	77.16	72.92	71.42	45	61	59	55	100	87	84	80			18	63.51	60.59	60.58	91.65	56	54	56	65	66	66	65	129
19	75.55	71.72	71.62	75.01	65	63	64	64	90	93	82	97			19	85.26	100.89	101.83	107.77	81	96	94	102	93	106	107	113
20	81.43	88.28	88.54	87.69	67	60	60	70	87	107	123	112			20	81.16	59.21	64.3	60.69	72	54	52	55	108	68	87	70
21	74.99	76.94	74.43	71.41	64	65	70	60	116	95	82	91			21	80.08	52.77	53.09	69.45	58	43	51	65	98	64	56	83
22	85.94	84.63	88.24	86.35	57	63	67	61	135	107	101	100			22	82.39	74.02	71.95	72.79	76	68	68	67	90	79	76	85
23	78.21	72.34	68.69	74.23	61	54	50	63	127	111	90	80			23	106.19	91.74	72.28	81.39	82	78	68	71	123	114	82	93
24	84.71	78.4	77.92	74.33	73	68	65	67	101	88	89	82			24	86.91	70.26	69.91	98.28	83	62	60	87	102	80	85	114
25	78	73.11	70.9	78.24	57	56	51	57	94	105	101	97			25	85.7	69.36	74.44	67.22	79	67	66	59	97	73	91	76
26	79.52	74.87	75.81	77.28	58	57	58	63	101	97	93	98			26	81.05	69.1	64.08	81.25	72	64	60	57	102	77	69	131
27	78.28	74.49	77.18		68	53	68		100	92	90				27	94.87	78.78	87.82		87	75	76		113	87	104
28	72.41	78.9	76.63	75.89	67	68	65	66	91	122	123	87			28	84.28	77.89	98.74	96.65	74	73	75	84	112	89	145	113
29	71.35	95.28	87.54	80.01	65	78	70	66	76	106	111	97			29	76.57	79.56	70.85	78.15	68	68	50	71	99	103	104	89
30	71.47	75.44	72.5	73.61	57	67	66	66	111	91	80	81			30	80.17	83.5	93.61	102.1	59	76	87	96	87	103	104	108
31	72.74	85.58	79.61	76.25	57	68	66	63	130	113	108	104			31	80.22	92.93	81.99	66.48	71	77	73	63	126	130	100	71
32	68.3	81.47	77.45	70.39	53	59	61	53	109	97	98	86			32	51.78	52.84	51.39	59.44	45	49	43	45	61	67	62	80
33	101.16	107.14	73.66	80.21	89	87	62	69	118	123	95	111			33	77.79	65.78	63.83	86.12	71	62	56	67	89	74	115	115
34	80.8	76.52	78.55	66.77	72	58	60	54	108	98	93	74			34	94.75	75.75	69.93	78.65	70	69	62	73	123	86	82	86
35	88.02	77.9	85.73	71.09	76	63	52	46	106	98	109	100			35	70.39	56.51	72.63	79.39	54	46	52	61	105	64	82	101
36	73.6	74.45	71.75	77.37	67	66	60	66	139	83	94	95			36	62.96	55.17	77.76	83.63	60	52	68	77	105	60	87	91
37	73.62	76.55	86.55	74.77	61	68	73	60	101	91	110	79			37	74.88	65.48	71.26	86.37	69	63	68	79	85	71	78	90
38	80.7	97.37	87.29	72.38	72	70	62	61	99	125	101	109			38	68.91	63.89	67.71	75.42	62	59	63	68	93	72	75	103
39	77.03	70.61	74.12	75.34	56	60	59	64	98	84	104	95			39	77.48	81.17	74.6	77.11	65	75	66	70	92	92	88	84
40	83.95	80.68	83.08	78.28	50	64	69	60	104	90	103	98			40	92.29	55.04	51.39	59.48	55	50	46	52	126	62	58	85
41	74.57	87.74	90.46	91.49	64	68	69	80	121	97	104	110			41	102.12	94.39	87.33	98.67	89	77	74	84	120	108	107	124
42	78.26	76.33	73.59	65.61	54	56	57	57	101	115	98	89			42	66.82	65.98	86.85	83.05	54	49	78	74	80	76	96	104
43	75.39	73.37	69.57	72.42	64	56	61	51	130	89	87	88			43	75.11	79.4	74.4	98.16	60	70	61	76	86	93	85	125
44	76.51	73.63	71.57	83.57	65	68	61	71	96	81	98	92			44	48.48	45.87	53.71	42.6	46	44	44	39	52	55	78	51
45	77.17	79.61	72.73	68.85	62	63	57	59	98	99	105	83			45	81.45	79.06	77.37	80.98	75	75	71	77	108	85	89	88
46	76.65	75.51	78.81	75.45	65	67	57	55	85	87	87	108			46	68.95	65.11	66.43	62.46	65	62	58	55	78	73	110	75
47	85.93	86.03	90.87	92.07	45	73	62	72	106	102	117	114			47	98.6	82.41	60.39	66.22	81	74	53	55	102	95	66	102
48	75.04	71.48	84.41	83.03	63	55	54	66	96	97	100	102			48	68.71	53.59	51.51	98.89	52	46	40	85	96	59	60	110
49	90.13	103.61	84.1	70.81	67	71	65	34	102	144	134	95			49	68.6	64.49	63.27	67.34	58	52	56	63	89	90	75	88
50	74.61	82.62	77.12	75.27	60	67	65	61	133	102	84	91			50	73.44	68.5	82.05	86.6	56	64	75	69	84	81	98	128
51	68.09	69.51	72.77	74.83	52	49	60	59	117	88	109	98			51	85.05	72.61	67.85	76.84	71	68	63	64	103	80	75	101
52	65.57	79.89	79.36	78.26	52	68	68	58	90	107	89	105			52	60.38	64.02	73.57	75.45	56	55	69	60	68	69	77	127
53	73.63	75.58	78.28	92.93	59	61	55	75	100	111	100	108			53	97.43	92.71	87.76	85.69	87	84	77	81	111	99	104	95
54	77.01	82.93	82.11	70.13	56	59	60	58	88	101	97	98			54	74.34	63.03	57.01	65.58	65	56	49	55	91	75	78	77
55	78.34	83.67	91.74	80.82	66	77	74	71	89	94	103	87			55	84.52	79.8	83.29	98.4	75	67	67	84	114	111	111	122
56	74.98	86.63	76.54	80.05	65	73	61	64	111	100	99	95			56	72.52	69.97	63.95	75.11	63	64	53	69	85	73	73	100
57	79.24	76.22	70.44	89.46	74	68	61	67	85	90	130	109			57	86.92	94.76	93.15	74.42	82	87	85	70	92	99	104	79
58	74.51	78.5	77.37	85.94	66	62	65	67	86	98	100	99			58	103.04	81.16	83.85	88.65	87	74	77	79	119	87	92	111
59	80.57	85.84	77.5	80.82	59	65	63	61	113	127	114	103			59	86.19	86.52	87.94	85.85	81	81	77	78	102	91	106	97
60	79.68	78.03	78.63	77.42	62	59	60	59	114	97	105	100			60	82.19	71.98	70.39	73.86	61	64	61	61	105	81	80	89
61	77.67	82.5	74.15	92.45	59	65	61	77	99	99	81	110			61	100.21	65.29	64.18	72.52	79	63	63	68	111	69	67	87
62	75.25	87.89	75.98	73.11	60	65	53	58	113	102	86	89			62	87.8	83.27	67.42	69.08	60	76	60	60	95	91	90	89
63	74.29	79.32	68.36	72.1	58	63	58	58	96	112	93	97			63	64.33	61.16	65.87	71.13	48	47	58	60	96	97	75	88
64	81.12	82.77	74.15	82.38	66	65	67	69	103	97	89	94			64	95.31	80.53	77.71	72.95	84	71	73	62	105	89	88	83
65	82.26	77.97	77.22	77.76	67	62	58	54	97	106	87	93			65	64.18	59.67	51.74	58.42	55	51	46	51	75	71	64	74
66	73.57	83.01	82.69	67.55	50	74	65	60	125	94	98	81			66	60.16	67.54	69.46	71.81	55	63	64	66	77	72	77	80
67	65.11	71.46	69.44	70.94	54	56	62	58	77	89	83	89			67	60.1	59.4	67.01	66.61	53	51	50	54	69	69	102	121
68	71.98	72.92	72.89	73.25	60	60	61	60	100	95	90	97			68	72.93	74.52	54.65	70.49	51	58	44	60	116	120	75	86
69	79.22	75.36	90.73	70.75	69	69	79	62	96	111	99	106			69	53.76	43.38	41.86	68.25	45	39	36	60	72	48	46	81
70	89.36	99.3	87.86		72	83	52		119	121	107				70	105.59	95.33	103.52		75	73	79		138	120	162
71	80.12	86.33	78.16	87.22	66	69	69	75	93	103	86	119			71	82.36	77.75	78.21	91.52	75	71	73	81	112	98	86	101
72	73.02	90.61	82.44	68.17	53	67	57	57	101	108	104	95			72	93.93	91.76	84.28	108.07	75	79	71	98	138	108	115	119
73	71.15	72.07	73.84	66.47	57	54	60	54	99	88	85	86			73	50.02	52.37	53.57	62.59	43	44	44	48	71	67	66	93
74	85.69	107.37	81.92	72.44	68	97	44	55	94	117	97	104			74	61.37	52.7	48.35	70.24	58	50	43	57	69	55	58	104
75	109.24	114.22	76.72	73.76	78	91	60	62	140	141	94	108			75	58.98	76.11	79.87	83.14	47	65	74	80	84	95	91	88
76	89.95	82.98	77.31	76.59	64	68	62	60	117	134	96	120			76	81.78	82.78	89.19	83.8	76	79	83	77	89	86	102	91
77	78.3	83.3	83.23	67.35	64	67	55	58	94	105	113	74			77	59.67	55.34	71.24	104.92	54	48	57	100	81	70	108	110
78	74.03	74.6	74.85	83.35	58	65	51	70	112	91	89	107			78	66.99	63.28	68.04	66.15	56	58	64	62	77	78	71	72
79	75.75	74.61	70.9	94.95	63	62	63	77	100	94	91	106			79	67.51	59.08	50.13	67.31	54	53	41	60	103	76	62	80
80	78.13	66.75	74.03	75.44	53	58	68	59	93	75	92	94			80	55.18	55.12	56.54	49.64	49	52	51	44	65	61	79	59
81	78.84	88.55	78.8	91.29	64	67	59	63	117	98	100	109			81	82.78	82.48	70.77	65.86	73	60	61	56	96	120	81	77
82	77.8	73.28	72.66	69.65	69	57	66	56	108	83	84	83			82	77.33	77.49	76.23	66.1	69	72	72	61	133	83	88	80
83	82.91	79.13	73.08	78.08	65	66	61	65	124	105	80	117			83	60.57	47.97	47.39	57.27	52	43	41	48	78	60	54	105
84	79.16	78.15	78.59	80.01	56	56	57	65	110	94	103	100			84	58.08	57.97	60.16	70.42	51	53	55	51	69	70	103	115
85	77.5	83.72	72.56	79.34	63	68	59	58	115	104	103	103			85	60.08	63.62	66.59	66.76	47	59	60	58	117	90	85	80
86	80.74	75.59	70.78	93.2	61	60	58	80	108	105	87	101			86	83.81	96.45	85.45	74.37	79	85	80	69	92	109	90	81
87	78.02	74.69	75.17	75.08	61	54	60	62	113	90	95	96			87	74.66	62.03	50.63	61.04	64	57	45	48	95	85	61	100
88	80.73	74.51	75.66	77.06	68	64	66	67	95	83	83	98			88	49.8	55.73	50.96	71.05	45	49	44	56	64	65	76	100
89	92.43	81.46	80.91	87.7	73	64	65	59	118	115	108	125			89	105.01	99.17	99.34	92.64	92	93	96	88	116	113	105	101
90	68.82	75.41	66.74	79.06	54	64	54	60	83	81	75	99			90	74.35	66.93	68.87	68.59	66	64	66	61	88	71	76	86
91	78.52	89.18	94.71	73.72	59	78	78	61	96	127	107	114			91	78.15	59.43	46.48	89.32	56	48	42	78	119	107	51	109
92	78.27	80.76	79.62	72.12	62	49	63	53	89	104	91	82			92	81.24	74.29	74.75	66.75	76	69	68	55	90	79	82	80
93	79.59	76.32	73.39		50	58	60		101	97	90				93	86.56	102.77	95.03		80	92	84		96	115	110
94	71.06	74.16	92.09	62.35	62	57	77	46	92	99	105	96			94	95.96	90.14	117.02	107.1	77	85	95	86	123	96	128	197
95	74.2	90.66	80.23	79.78	57	75	65	63	122	108	98	92			95	86.11	72.79	71.03	67.11	72	67	59	59	100	89	91	87
96	79.76	89.86	70.23	99.16	62	53	58	89	112	116	87	128			96	66.5	86.28	76.05	101.75	60	80	68	90	95	104	86	109
97	71.36	69.4	69.49	70.54	58	60	55	62	86	80	83	87			97	99.08	102.01	100.47	107.25	88	95	92	100	112	111	110	128
98	81.27	79.7	72.89	76.13	59	70	63	62	95	112	98	105			98	84.12	83.46	81.51	85.14	74	81	78	78	108	91	88	93
99	72.32	75.6	75.94	78.16	58	63	64	66	115	86	91	90			99	61.05	63.23	57.1	62.71	56	59	54	57	69	69	71	73
100	75.1	76.18	82.23	87.89	61	61	68	72	98	89	106	143			100	70.31	80.85	83.46	78.88	63	61	74	72	87	109	96	93
101	79.39	78.49	79.42	67.91	64	56	56	62	99	97	101	83			101	61.18	66.4	61.87	105.5	53	59	53	98	77	83	70	111
102	70.28	81.98	82.73	77.9	61	69	73	69	88	102	97	90			102	86.99	81.18	77.15	68.83	76	74	71	64	100	92	90	77
103	75.42	68.85	74.43	70.84	62	59	64	56	90	90	98	85			103	79.04	67.17	79.25	74.57	66	58	70	62	103	90	116	88
104	78.54	74.97	80.82	81.39	64	53	67	56	93	93	100	98			104	57.45	59.9	52.06	52.86	45	49	43	46	75	93	60	59
105	81.34	73.32	69.1	79.38	66	61	61	70	88	82	83	85			105	127.33	75.82	66.19	61.89	97	66	62	59	155	116	71	70
106	79.62	72.33	71.27	73.7	53	60	52	65	120	94	96	85			106	82.74	73.19	76.52	89.24	59	63	59	71	110	82	93	114
107	75.96	77.3	76.51	76.25	49	66	59	60	105	91	128	102			107	71.64	78.52	83.31	95.64	67	69	74	88	102	109	94	108
108	74.03				56				95						108	83.33				66				115
109	87.62	92.37	99.05	79.05	60	82	80	71	132	105	127	91			109	62.8	74.59	68.57	87.45	46	62	54	80	91	123	107	114
110	80.38	64.87	72.33	69.28	54	52	57	56	99	79	90	104			110	64.34	66.4	65.52	64.66	59	62	63	60	74	72	69	71
111	85.71	85.05	81.82	92.45	57	66	68	69	144	106	98	139			111	110.18	113.92	91.68	94.57	76	104	80	84	120	124	108	109
112	70.99	76.92	67.64	64.74	54	52	57	51	138	138	83	74			112	95.12	71.1	73.35	80.11	84	62	60	69	103	84	89	94
113	74.83	75.58	91.8	77.11	65	69	81	64	107	115	120	97			113	65.87	67.81	63.59	78.37	60	60	57	74	76	73	70	85
114	77.54	75.85	91.36	76.53	67	63	61	59	104	87	119	98			114	62.94	51.76	52.94	59.41	51	45	40	48	78	61	112	72
115	73.9	80.8	75.84	70.35	64	57	65	48	83	98	103	113			115	80.63	58.13	59.31	80.68	70	52	55	60	92	115	67	112
116	69.61	78.83	71.73	84.25	61	57	61	67	81	95	79	99			116	92.41	96.43	83.35	73.39	79	88	71	65	99	114	100	80
117	83.2	101.56	74.53	75.27	61	70	59	68	111	115	108	88			117	87.69	74.4	76.47	91.32	80	53	71	83	105	95	83	98
118	81.77	84.83	75.63	77.79	65	52	61	62	89	101	95	100			118	77.63	75.14	73.4	80.4	75	72	70	75	84	85	81	83
119	78.22	75.24	77.17	71.12	61	68	74	64	103	83	84	87			119	76.01	87.77	89.99	81.31	71	46	84	77	86	105	103	109
120	73.49	69.85	73.08	78.71	59	60	62	60	99	99	88	92			120	70.65	75.11	76.28	74.37	61	70	72	71	99	95	87	81
121	72.89	83.12	78.21	78.03	58	67	63	61	86	110	97	88			121	110.94	99.52	107.76	102.59	99	92	95	92	127	108	120	121
122	66.94	69.43	66.55	79.1	52	53	58	69	87	86	80	109			122	65.01	96.12	85.9	72.81	56	75	76	66	91	116	98	82
123	71.66	72.35	69.59	80.34	59	62	54	52	83	99	92	107			123	90.4	82.66	86.26	80.08	74	76	78	65	113	97	107	109
124	76.41	68.71	72.96	74.57	64	55	57	64	94	57	114	84			124	108.89	103.63	111.51	89.36	98	94	109	79	165	127	118	138
125	80.6	73.89	70.55	86.72	67	70	66	67	99	79	80	116			125	73.42	77.29	83.47	73.39	68	70	79	70	82	85	97	79
126	79.77	70.06	79.99	93.67	65	60	59	80	110	103	120	111			126	83.12	81.3	68.08	81.89	72	68	61	74	116	95	76	107
127	80.45	78.16	76.44	82.07	68	66	58	68	113	98	96	101			127	87.88	106.94	108.27	122.76	80	92	93	107	101	117	125	143
128	78.5	73.58	77.6	76.53	69	50	57	63	100	102	95	92			128	76.4	91.78	95.14	88.31	64	76	86	83	122	113	109	97
129	94.06	96.39	103.55	94.18	73	73	83	79	118	112	120	121			129	67.11	78.3	83.5	93.26	60	70	77	84	78	86	101	104
ECMO-flow (l/min)	average				min				max						gas-flow (l/min)	average				min				max
Pat-Nr	0-24h	48-72h	96-120h	216-240h	0-24h	48-72h	96-120h	216-240h	0-24h	48-72h	96-120h	216-240h			Pat-Nr	0-24h	48-72h	96-120h	216-240h	0-24h	48-72h	96-120h	216-240h	0-24h	48-72h	96-120h	216-240h
1	3.38	3.42	2.84	2.58	3.3	2.9	2.8	1.3	3.5	3.6	2.9	2.9			1	3.78	3	2	2.13	3	3	2	2	4	3	2	3
2	3.99	4.15	4.03	2.23	3.6	4	3.7	2.2	4.2	4.2	4.1	2.3			2	4	4.75	5	5	4	4	5	5	4	5	5	5
3	2.87	3.03	3.49	3.86	2.5	2.6	3.2	3.7	3	3.5	4	4.2			3	4.4	6	6	8.5	4	6	6	8	5	6	6	10
4	3.97	4.75	4.72	4.15	3.7	4.2	4.6	3.39	4.16	5.16	4.95	4.5			4	4.67	7.4	8	8.55	4	6	8	8	6	8	8	10
5	3.4	3.97	3.32	2.95	3.34	3.81	3.23	2.61	3.48	4.3	3.37	3.27			5	4	4.13	6	6.45	4	4	6	6	4	5	6	7
6	3.07	2.35	2.03	3.29	2.71	1.99	1.8	3.08	3.38	2.46	2.15	3.63			6	2.91	3	3.11	4.75	2	3	3	3.5	3	3	4	5
7	4.49	4.79	4.3	5.54	4.39	4.2	3.5	5.25	4.57	5.1	4.5	5.7			7	6.91	6.78	8.54	10.2	6	6	7	8	7	7	9	12
8	3.71	4.35	4.13	4.45	3.3	4.1	3.8	3.8	4.2	4.7	4.4	4.7			8	4	5	4	5	4	5	4	5	4	5	4	5
9	3.79	3.08	2.65	2.38	3.7	2.8	2.6	2.31	3.9	3.36	2.75	2.48			9	6	4	4	8	6	4	4	8	6	4	4	8
10	3.73	4.04	4.01	3.02	3.44	3.97	3.68	2.54	4.07	4.15	4.2	3.6			10	4.25	9	10.75	11	2	9	10	11	6	9	11	11
11	3.5	3.33	3.79	4.17	3.33	3.2	3.67	3.9	3.63	3.9	3.94	4.5			11	3.5	8	6	6	3	8	6	6	5	8	6	6
12	2.63	2.26	1.41		2.5	2	0.8		3.1	2.6	1.6				12	4.5	5.25	3.62		2	3	2		5.5	6	5
13	3.87	4.12	4.07	3.05	3.6	4	3.8	2.77	4.04	4.2	4.37	3.25			13	6	6.6	7.38	7	6	6	7	7	6	8	8	7
14	3.83	4.49	4.84	4.95	3.5	4.4	4.4	4.86	4.35	4.53	5.12	5.08			14	3.9	6.46	7	8.91	3	6	7	8	6	7	7	11
15	3.54	4.51	4.6	3.95	3.42	4.14	4.6	3.9	3.64	5.2	4.6	4.05			15	4	7.08	10	9	4	5	10	9	4	10	10	9
16	3.73	4.11	3.73	3.04	3.5	4	3.6	0.3	4	4.2	3.9	3.6			16	2.64	3.57	4.29	4	2	3	4	4	3	6	6	4
17	3.6	4.15	3.16	3.68	2.8	3.5	2.5	3.6	4.1	4.4	3.49	4.1			17	3.64	4	5.09	7	3	4	5	7	4	4	6	7
18	2.8	2.8	2.17	2.73	2.8	2.8	1.8	2.7	2.8	2.8	2.3	2.8			18	3.73	4	4	3.89	3	4	4	3	4	4	4	4
19	2.91	3.05	2.97	2.56	1.8	2.93	2.64	2.51	3.1	3.1	3.04	2.6			19	6.91	8	8	8	6	8	8	8	8	8	8	8
20	3.95	3.86	3.01	1.08	3.55	3.73	2.46	0.94	4.06	4.09	3.65	1.24			20	4.67	5	4	2.33	4	5	4	2	5	5	4	3
21	4	4.09	3.78	3.91	3.71	4.04	3.58	3.45	5	4.15	3.92	4.1			21	4	4.71	6	6.27	4	4	6	6	4	6	6	7
22	3.1	2.81	2.69	1.4	2.9	2.6	2.5	1.4	3.2	3	2.8	1.4			22	3.83	3	2	1.18	3	2	2	0	4	4	2	10
23	3.55	2.96	3.34	2.01	3.2	2.5	3.1	1.87	3.88	3.07	3.58	2.1			23	2.33	4.4	5	4.33	2	4	5	3	4	6	5	5
24	3.47	3.49	3.36	3.12	3.36	3.43	3.2	3.04	3.54	3.61	3.46	3.21			24	3	4.08	5.43	5	3	4	5	5	3	5	6	5
25	4.03	3.89	3.92	3.73	3.8	3.8	3.9	3.6	4.2	4	4	3.8			25	4	6	6	4.38	4	6	6	3	4	6	6	6
26	2.85	3.55	3.52	3.29	2.5	3.3	3.3	3.25	3.02	3.82	3.63	3.35			26	3.45	5	5	5	3	4	5	5	4	6	5	5
27	4.05	4.32	4.64		3.93	4.13	3.85		4.25	4.44	4.78				27	5.17	6	6		5	6	6		6	6	6
28	2.84	2.23	2.82	2.23	2.75	1.93	2.55	2.12	3.05	2.55	3.03	2.45			28	3	5.5	6	4.2	3	5	6	4	3	6	6	5
29	2.73	2.67	2.57		2.43	2.55	2.22		2.86	2.74	2.7				29	2.07	4	3.11		2	4	3		3	4	4
30	4.07	4.1	4.47	3.89	3.92	3.81	4.4	3.8	4.12	4.3	4.54	4.01			30	3.55	4.25	5.27	8.09	2	3	5	8	4	5	6	9
31	3.6	3.25	3.51	2.83	3.1	3.1	3.4	2.7	4.1	3.4	3.6	3.1			31	3	4	4.38	4	2	4	4	4	4	4	4.5	4
32	2.58	2.87	2.46	1.72	2.3	2.69	2.28	0.9	2.79	3	2.51	2.01			32	3.33	5.83	5	4	2.5	5	5	4	5	6	5	4
33	3.49	3.4	2.32		3.37	3.25	1.8		3.67	3.5	2.8				33	6.25	5	5		6	5	5		8	5	5
34	3.46	3.41	3.69	3.97	2.3	2.9	3.5	3.9	4	3.8	3.9	4			34	4.13	5.11	4	6	3	5	4	6	6	6	4	6
35	3.12	2.3	2.34	2.31	2.4	2.25	2.12	1.8	3.4	2.36	2.42	2.63			35	4.55	4.5	4	4.64	4	4.5	4	4	5	4.5	4	5
36	3.01	3.02	2.99	2.96	2.96	2.78	2.95	2.89	3.08	3.15	3.06	3.12			36	5	4	5	7	5	4	5	7	5	4	5	7
37	3.64	3.96	4.1	3.96	3.5	3.9	3.9	3.8	3.7	4	4.2	4.1			37	4.46	7	8	7	3.5	7	8	7	6	7	8	7
38	2.42	2.39	2.48	1.44	2.3	2.3	2.4	1.4	2.8	2.5	2.5	1.5			38	2.58	2.18	3	0.75	2.5	2	3	0	3	3	3	1
39	2.41	2.29	2.11	2.12	2.15	2	1.77	2	2.6	2.49	2.3	2.3			39	2	4	4	6	2	4	4	6	2	4	4	6
40	2.9	3.59	3.41	3.17	1.3	3.5	3.4	1.8	4	3.6	3.5	3.5			40	2.75	2.78	2.95	3.31	2	2.5	2.5	3	4	3.5	4	4
41	4.19	4.09	3.24	3.25	3.8	3.95	3.16	3.05	4.38	4.24	3.35	3.34			41	6.14	8	8.45	10.6	5	8	8	10	8	8	9	11
42	3.07	2.83	2.32	1.6	2.65	1.6	1.8	1.26	3.4	3.11	2.56	2.04			42	2.57	2.88	3.77	1.97	2	1.5	3	0	4	3	4	4
43	3.53	3.79	3.63	3.7	2.8	3.44	3.35	3.32	4.43	4.22	3.85	4.17			43	3.75	5	4.57	7.29	3	5	4	7	5	5	5	8
44	2.89	2.8	2.57	2.7	2.85	2.67	2.34	2.58	2.94	2.94	2.71	2.79			44	3.75	4	4	3.55	3	4	4	2	6	4	4	4
45	3.01	3.36	3.1	2.21	2.88	3.1	2.66	2.13	3.41	3.54	3.4	2.27			45	3.55	5	4.5	7.17	3	5	4	6	5	5	5	8
46	2.99	2.91	2.39	2.8	2.88	2.8	1.56	2.25	3.11	2.98	2.7	3.06			46	3.42	5.55	7.13	8	3	5	7	8	4	6	8	8
47	3.2	3.18	3.22	2.66	3.11	3.11	3.17	2.56	3.27	3.24	3.28	2.8			47	5.17	6	6	5	5	6	6	5	6	6	6	5
48	3.35	3.58	3.58	3.91	3.1	3.37	3.4	3.61	3.5	3.66	3.75	4.03			48	4.2	6.17	7.5	9.33	3	6	7.5	9	6	6.5	7.5	10
49	3.71	3.56	3.5	3.51	3.4	3.36	3.18	3.34	4.01	4.02	3.63	3.61			49	5	5	5	4.1	5	5	5	4	5	5	5	5
50	2.81	2.44	2.72	3.97	2.5	2.12	1.8	3.8	3.4	2.74	3.07	4			50	4	4	5	6.31	4	4	5	6	4	4	5	7
51	2.94	3.11	3.32	3.36	2.6	2.9	2.3	3.2	3.1	3.2	3.5	3.5			51	3.75	3	3.69	3	3	3	3	3	4	3	4	3
52	2.75	2.6	2.84	2.29	2.32	1.99	2.5	2.1	3.01	2.78	3.03	2.53			52	2.11	4	6.9	4	2	4	6	4	3	4	7	4
53	3.76	3.93	4.58	2.57	3.48	3.48	4.46	2.2	4	4.09	4.68	3.01			53	5.5	9	9	4.5	2	9	9	4	7	9	9	5
54	4.09	3.85	3.51	2.65	4	3.8	3.2	2.5	4.2	3.9	3.9	2.9			54	4.47	5	5	4	3.5	5	5	4	5	5	5	4
55	2.21	2.28	2.95	2.19	2.1	2.2	2.78	2.16	2.43	2.46	3.07	2.21			55	3.27	4	6	5	3	4	6	5	4	4	6	5
56	3.18	3.74	3.59	2.82	2.96	3.64	3.1	2.79	3.3	3.85	3.7	2.85			56	4	6	6	5.92	4	6	6	5	4	6	6	6
57	3.19	3.47	3.23	3.51	3	3.4	3	3.4	3.5	3.5	3.4	3.8			57	3.05	3	3.93	4	3	3	3	4	4	3	5	4
58	3.66	4.62	4.3	3.84	3.21	4.4	3.89	3.73	4.53	4.98	4.52	3.97			58	7.5	11.33	12	12	4	11	12	12	10	12	12	12
59	4.22	4.28	4.17	3.04	4	4	3.9	3	4.3	4.4	4.4	3.1			59	5	5	5	4.64	5	5	5	4	5	5	5	5
60	2.56	3.08	2.52	2.52	2.19	2.7	1.3	2.22	3.15	3.25	2.69	2.71			60	3.5	4.13	4.79	4.67	2	4	4	4	4	5	5	6
61	3.36	3.49	3.03	2.99	3.11	3.1	2.7	2.77	3.47	3.72	3.2	3.21			61	5.47	6.27	7	7	5	6	7	7	6	7	7	7
62	2.96	3.09	3.53	3.04	2.8	3.01	3.34	2.9	3.2	3.3	4.5	3.11			62	3.6	5	4.5	6	3	5	4.5	6	4	5	4.5	6
63	3.4	3.48	3.07	2.92	3.3	3.2	2.8	2.5	3.5	3.7	3.2	3.1			63	6.36	6	6.6	4	6	6	6	4	8	6	7	4
64	3.23	3.15	2.95	2.29	3.1	3	2.6	2	3.4	3.2	3.2	2.4			64	7	6	5	2.69	7	5	5	2	7	7	5	3
65	3.45	3.39	3.23	3.01	3.22	3.29	3.04	2.57	3.72	3.45	3.4	3.18			65	5.67	5	5	5	5	5	5	5	7	5	5	5
66	3.42	4.06	4.08	3.46	3.08	3.9	4.03	3.08	4.04	4.15	4.1	3.66			66	4.39	7.31	8.25	9	3	6	8	9	6	8	10	9
67	2.68	2.48	2.33	2.23	2.5	2.4	2.3	2	2.8	2.5	2.4	2.5			67	3.08	4.33	3.38	3.3	3	4	3	3	4	7	4	4
68	3.9	3.32	2.9	3.68	3.7	2.8	2.2	3.6	4.1	3.5	3.3	3.8			68	7.17	8.05	8	5.33	7	7.5	8	5	8	8.5	8	6
69	3.19	2.63	2.08	1.82	2.97	2.36	1.8	1.8	3.54	2.75	2.43	1.85			69	4.58	3.5	3.56	3	4	3.5	3	3	6	3.5	4	3
70	3.14	2.47	2.23		2.5	2.4	2.02		3.46	2.57	2.34				70	1.83	5	4.67		1	5	4		3	5	5
71	3.7	3.46	4.01	4.82	3.61	3	3.6	4.3	3.79	3.7	4.15	5.01			71	6.4	7	6.9	8	6	7	6	8	9	7	7	8
72	3.9	3.39	1.89	1.55	3.84	2.95	1.7	1.42	3.99	3.88	2.16	1.65			72	4.33	4.09	2.54	5.17	3	3	1	4	5	5	4	6
73	3.39	2.74	2.41	1.53	3.22	2.5	2.36	1.42	3.56	2.8	2.45	1.59			73	3.25	5	3	1.73	3	5	3	0.5	4	5	3	2
74	3.05	2.49	2.66	1.98	2.66	2.33	2.54	1.89	3.48	2.6	2.87	2.02			74	5.18	4	4	2	5	4	4	2	7	4	4	2
75	2.87	2.52	2.31	1.89	2.3	2.2	2.06	1.55	3.6	2.71	3.2	2.39			75	3.9	4.73	4.31	3.5	3.5	4	4	3.5	4.5	5	5	3.5
76	2.61	2.22	2.14	2.94	2.2	2	2.1	2.9	2.8	2.5	2.2	3			76	2.17	2.4	3	2.5	2	2	3	2.5	3	3	3	2.5
77	3.47	3.19	3.42	3.33	3	2.93	3.31	3.1	3.85	3.42	3.56	3.47			77	5.43	6.18	6	9.17	5	6	6	9	6	7	6	10
78	3.62	3.14	2.67	1.93	3.6	2.81	2.52	1.9	3.68	3.5	2.83	2.01			78	5.17	4.17	3	1.5	5	3.5	3	1.5	6	5	3	1.5
79	2.69	2.39	2.38	1.46	2.4	1.8	2.3	1.3	3.2	2.9	2.4	1.7			79	2.17	3	3	0.9	2	3	3	0	3	3	3	1
80	2.93	3.04	3.12	2.88	2.46	2.95	3	2.81	3.2	3.13	3.27	3			80	3.25	3.8	5	4	3	3.5	5	4	4	4	5	4
81	3.02	2.92	2.68		2.9	2.8	2.5		3.1	3.1	2.9				81	4.2	2.5	2.21		4	2.5	2		5	2.5	2.5
82	3.16	3.29	3.23	4.08	2.96	1.2	2.65	3.97	3.35	3.51	3.6	4.14			82	4.42	8.46	4.38	7.3	3	8	4	5	5	9	5	9
83	3.84	3.32	2.94	2.96	3.3	2.9	2.5	2.8	4.3	3.7	3.3	3.1			83	4.34	3.96	4.22	3	3.5	3.5	4	3	5	4	6	3
84	3.14	3.39	3.04	3.27	2.9	3.2	0.9	3	3.3	3.5	3.4	3.5			84	4.73	4	4	4.15	4	4	4	4	5	4	4	6
85	3.62	3.46	3.8	3.92	3.43	3.3	3.65	3.85	3.77	3.55	4	3.96			85	3	4	5.15	6	3	4	5	6	3	4	6	6
86	3.1	2.93	3	2.45	2.9	2.81	2.94	2.4	3.19	2.98	3.01	2.52			86	5.33	5	6	7.17	5	5	6	6	6	5	6	8
87	3.35	3.71	3.36	3.67	2.8	3.3	3.29	3.05	3.7	3.9	3.41	3.8			87	3.8	6		6	3	6		6	6	6		6
88	2.98	3.2	2.7	2.08	2.81	2.8	2.2	1.97	3.22	3.3	2.93	2.18			88	4.5	8	8.11	2.57	4	8	8	2	6	8	9	4
89	3.07	3.46	3.74	4.41	2.91	3.23	3.61	4.3	3.17	3.87	4.17	4.5			89	4.45	8	7	9	4	8	7	9	5	8	7	9
90	3.67	3.15	3.32	3.64	3.5	2.86	3.2	3.5	3.8	3.26	3.47	3.8			90	3.91	5	5	6	3	5	5	6	5	5	5	6
91	3.61	3.85	3.71	2.79	3.5	3.7	3.7	2	3.7	3.9	3.8	3.5			91	4.22	6.64	7.71	6	4	5	7	6	6	7	8	6
92	3.28	3.22	3.4	2.73	3	3.2	3.4	2.5	3.5	3.3	3.4	2.8			92	4.17	5	5	5	4	5	5	5	5	5	5	5
93	3.17	3.13	3.21		3.05	3.03	3.1		3.26	3.2	3.31				93	5.18	7	8		5	7	8		6	7	8
94	4.06	4.5	4.64	4.88	3.9	4.5	4.6	4.8	4.5	4.5	4.7	4.9			94	4.96	7.36	8.22	11	3.5	7	8	10	7	9	10	12
95	3.44	3.45	3.3	2.64	3.1	3.3	2.85	2.5	3.62	3.5	3.44	2.79			95	3.17	5.18	6	8	2.5	5	6	8	4	6	6	8
96	2.66	1.87	1.31		2.5	1.8	1.2		3.1	1.9	1.4				96	2.35	1.82	0.9		2	1.5	0		4	2	1
97	3.77	4.07	4.08	3.64	3.3	4.01	4.03	3.21	3.99	4.1	4.1	4			97	3.16	6	8	9	2	6	8	9	5	6	8	9
98	3.6	3.11	3.11	2.78	3.1	3.1	2.7	2.7	3.8	3.2	3.2	2.9			98	3.4	4	3.94	3	3	4	3.5	3	4	4	4	3
99	2.97	3	2.51	3.44	2.88	2.48	2.47	3.43	3.14	3.14	2.59	3.44			99	3.9	4	3.94	6	3	4	3	6	4	4	4	6
100	3.42	4	3.65	4.39	2.9	3.7	3.6	4.3	3.7	4.5	3.7	4.4			100	3.82	5	5.71	8	3	5	5	8	4	5	6	8
101	3.42	3.36	3.09	2.94	3.31	3.11	2.89	2.76	3.6	3.48	4	3.1			101	4.5	5	4.64	4.27	4	5	4	4	6	5	5	6
102	3.29	2.84	2.46	2.71	3.12	2.65	2.04	2.68	3.36	2.95	2.63	2.75			102	4.5	6.83	6.25	8	4	5.5	5.5	8	5	7	7	8
103	3.58	3.64	3.58	3.71	3.5	3.55	3.53	3.35	3.68	3.8	3.69	3.86			103	4	5.8	10	5	4	5	10	5	4	6	10	5
104	3.16	3.27	3.79	4.1	2.8	2.69	3.7	3.96	3.78	3.62	3.9	4.3			104	3.25	6.58	8.2	10.55	2	5	8	10	6	8	9	12
105	3.01	2.98	2.78		2.45	2.81	2.44		3.13	3.18	2.98				105	5.8	8	8.29		5	8	6		6	8	9
106	2.94	3.62	3.45	3.15	2.55	3.41	3.28	2.61	3.22	3.75	3.54	3.23			106	3.8	5	6	3.71	3	5	6	3	6	5	6	4
107	3.53	3.12	3.06	2.66	2.9	2.7	3	2.6	3.8	3.3	3.1	2.7			107	6	6	6	6	6	6	6	6	6	6	6	6
108	3.86				3.75				3.96						108	4.86				4				6
109	3.17	2.74	2.11		3	2.4	1.9		3.3	2.9	2.2				109	4.22	3.93	2.29		3	3	0		6	5	3
110	3.05	3.82	3.41	2.72	2.47	3.77	3.2	2.32	3.7	3.9	3.6	2.94			110	5.67	8	12	10	5	8	12	10	8	8	12	10
111	2.6	3.49	2.94	2.17	2.3	3.2	2.6	1	2.7	3.9	3.1	2.5			111	3.9	4	4.38	3.25	3	4	4	3	5	4	5	4
112	3.97	3.94	4.18	4.08	3.87	3.15	3.4	3.92	4.08	4.4	4.55	4.2			112	4.33	7	9	7.5	4	7	9	7	5	7	9	8
113	2.82	2.52	1.85		2.5	2.4	1.6		3.2	3	2				113	2.85	2	2		2	2	2		6	2	2
114	3.26	2.83	2.49		3.1	2.8	2.39		3.4	3	2.7				114	6.14	4.18	3.58		6	4	3		7	5	4
115	4.33	3.66	2.47		3.9	3.4	2		4.52	4.2	3				115	10	5.36	2.29		10	5	2		10	6	3
116	2.03	3.81	3.41	3.43	1.97	3.6	3.3	3.2	2.11	4	3.6	3.6			116	7.75	8	8	6.89	7	8	8	6	10	8	8	7
117	4.01	4.01	4.29	3.93	3.3	3.9	2	3.82	4.3	4.2	4.6	4.06			117	7.11	6	6.4	8	6	6	6	8	8	6	8	8
118	3.12	3.72	3.38	3.39	2.73	3.64	3.33	3.36	3.9	3.82	3.4	3.43			118	3.63	6	6	10	3	6	6	10	5	6	6	10
119	2.95	2.88	2.74	2.55	2.7	2.6	2.7	2.44	3.4	3.1	3.1	2.61			119	3.81	3.22	3.55	3	3	3	3	3	4	4	4	3
120	3	3.61	3.67	3.55	2.55	3.4	3.18	3.3	3.34	3.67	3.92	3.65			120	5.21	6	4.73	4.25	5	6	4	4	7	6	6	5
121	3.1	3.04	2.93	2.4	2.4	2.9	2.4	2.3	3.5	3.2	3.2	2.5			121	3.2	5	5	4	2	5	5	4	4	5	5	4
122	2.84	3.12	2.6	4.09	2.74	2.4	2.3	3.8	3.01	3.8	3.2	4.6			122	5.14	4.7	4.8	4.08	5	3	4	4	6	6	6	5
123	2.65	2.52	2.79	3.22	1.99	2.45	2.43	1.8	3.02	2.58	2.95	3.66			123	3.23	5	6	6	2	5	6	6	5	5	6	6
124	3.73	3.55	3.74	3.55	3.5	3.4	3.5	3.5	4.1	3.6	3.9	3.6			124	6	5.3	3.9	4.17	5	5	3	4	7	6	6	4.5
125	3.37	3.07	2.7	3.02	3	2.74	2.55	3.01	3.5	3.26	2.8	3.06			125	5.23	6.4	7.32	8	5	6	6	8	6	8	8	8
126	3.59	2.54	2.7	2.47	3.3	2.41	2.48	1.3	3.76	2.78	3.05	3.2			126	4.58	4.31	4	2	4	4	4	2	6	4.5	4	2
127	3.08	2.23	1.95		2.97	2.02	1.88		3.21	2.45	2.01				127	3.7	2	2		3	2	2		6	2	2
128	3.07	2.47	2.38	2.16	2.9	2.4	2.3	2	3.2	2.5	2.5	2.2			128	4.13	3.71	3	4	4	3	3	4	5	4	3	4
129	2.91	2.73	2.81	1.5	2.8	2.6	2.7	1.5	3.1	2.8	2.9	1.5			129	3.8	4.8	5	1.5	3	4	5	1	4	5	5	2

## Sheet: ventilator therapy
FiO2 (%)	average				min				max						Horowitz	average				min				max
Pat-Nr	0-24h	48-72h	96-120h	216-240h	0-24h	48-72h	96-120h	216-240h	0-24h	48-72h	96-120h	216-240h			Pat-Nr	0-24h	48-72h	96-120h	216-240h	0-24h	48-72h	96-120h	216-240h	0-24h	48-72h	96-120h	216-240h
1	36.17	40.33	40.05	46.83	35	35	40	45	45	45	40	50			1	246.2	184.78	177.22	155.67	211	151	162	82	272	210	199	202
2	58.65	38.57	37.88	46.05	50	35	35	35	100	40	50	100			2	118.73	198.83	194.71	179	80	155	143	167	152	229	229	190
3	76.23	76.7	52.98	72.06	65	50	40	60	96	100	100	100			3	103	91.86	149.75	110.7	90	72	57	82	122	132	182	136
4	75.26	98.18	77.49	52.65	69	90	69	49	100	100	100	100			4	92	62.78	96.86	134.43	83	56	85	92	97	76	109	163
5	76.62	53.3	59.26	48.24	65	45	55	40	100	56	100	52			5	107.73	145	128.67	156.33	53	131	105	134	139	164	138	204
6	57.32	41.05	48.29	41.56	41	40	45	40	100	46	60	45			6	175.4	186.4	150.25	167	145	164	55	83	230	205	193	198
7	96.1	87.01	94.24		82	76	86		99	99	99				7	76.75	111.75	76.5		69	85	61		92	174	106
8	54.73	71.68	75.83	99.98	39.9	44.8	59.7	99.9	100	100	100	100			8	146.33	116.91	90.88	68.3	111	90	66	58	184	144	106	76
9	94.46	50.32	53.45	58.57	90	50	50	54	98	98	90	67			9	66.18	166.29	144.89	114.8	28	149	121	67	113	177	174	132
10	56.36	51.31	56.58	37.96	50	45	45	35	100	55	70	99			10	136	145.6	125.36	192.88	116	132	94	180	153	160	169	205
11	38.94	37.64	92.16	88.2	35	35	65	70	40	45	100	100			11	225.6	251	80	118.43	193	208	77	88	267	294	85	137
12	45.43	41.66	34.62	39.49	40	40	30	35	52	100	46	50			12	191.33	208.56	280.75	239.86	138	197	227	187	289	252	346	313
13	53.46	45.13	45.06	65.63	45	45	45	60	100	46	46	100			13	168.44	171.29	191.57	122.86	153	145	154	106	197	185	218	166
14	81.46	79.19	49.24	63.55	79.1	60.2	44.8	59.4	100	100	99.9	100			14	86.6	106.36	177.86	122.56	76	78	85	104	101	129	207	145
15	65.4	62.59	44.71	66.29	58	53	40	63	100	85	50	69			15	125.14	127.55	166.62	105.13	55	85	132	101	171	161	204	113
16	55.4	61.14	66.8	62.85	39	59	59	50	100	61	100	66			16	139.4	138.56	127.38	125.43	125	111	93	101	183	173	165	173
17	55.89	45.36	58.98	67.45	45	45	45	50	100	45	98	80			17	142.22	173.13	136.5	137.25	94	147	89	114	207	194	163	175
18	57.55	42.46	40.15	40.5	40.9	39.3	39.8	39.5	70.4	45.4	40.8	45.3			18	126.75	178.38	178.88	187.4	94	159	171	159	156	188	184	219
19	68.87	80.39	65.03	61.25	60	80	65	50	80	85	66	70			19	101.57	86.14	114.6	134.4	80	80	98	109	127	92	126	170
20	53.33	35.52	32.59	34.9	45	35	30	30	90	40	40	40			20	134.25	256.83	248.25	211.71	89	236	159	173	166	272	331	231
21	93.55	69.33	54.95	65.97	69	58	49	62	100	100	77	70			21	73.56	116	179	109.17	60	71	118	84	98	154	216	172
22	42.9	54.64	40.74	41.17	40	45	40	35	50	71	100	100			22	175.1	130.64	199.4	210.25	150	85	188	171	199	156	214	233
23	54.19	40.18	40.79	35.01	35	35	40	35	100	100	40	36			23	210.71	207	208	213.71	146	145	191	198	251	232	236	237
24	59.95	49.44	45.99	54.24	60	45	40	50	60	100	55	65			24	128.5	149.33	185.78	151.71	108	132	145	130	142	165	227	180
25	60.75	53.97	62.49	62.07	50	50	59	49	80	56	66	100			25	126.8	143	115.8	121	69	123	86	103	159	195	136	187
26	59.74	85.37	40.18	62.44	50	74	40	45	70	100	41	66			26	145.55	81.17	170.71	135.29	121	65	149	98	168	99	191	164
27	74.08	99.98	94.91		69.5	99.9	70		100	100	100				27	95.6	65.67	83.78		85	56	65		104	75	123
28	59.8	49.51	45.85	45	54.5	39.9	44.6	44.7	99.9	55.2	50.2	45.3			28	151	161.63	172.43	172.43	131	141	156	168	173	222	188	178
29	36.2	41.87	35.92	39.91	35	40	30	39	60	51	50	40			29	221.14	199.89	259.86	196.38	188	137	206	159	243	233	317	222
30	96.67	58.79	97.38	63.66	85	55	90	50	100	70	100	70			30	88.44	133.11	74.56	151.5	64	110	66	136	142	150	81	170
31	43.99	42.3	35.17	38.01	35	40	35	35	80	50	36	100			31	165.9	166	204.13	216.29	113	133	179	198	226	194	244	237
32	65.56	53.86	37.5	41.45	51	45	35	35	100	75	41	98			32	138.18	166.43	223.86	193.13	108	144	191	148	171	199	254	219
33	60.15	33.72	32.08	38.25	54	29	30	35	70	100	100	41			33	137.57	262.44	246.63	251.43	117	190	189	212	159	327	289	291
34	77.27	87.08	72.07	81.73	59.2	79.4	65.1	79.3	80.1	90.1	80	100			34	75.75	63.89	88.43	96.57	65	56	79	84	89	78	93	113
35	47.55	45.06	48.61	42.39	45	45	40	40	61	46	100	45			35	178.67	161.44	161.44	213.43	139	134	124	196	210	192	196	242
36	59.13	35.17	55.02	60.07	50	35	50	50	80	36	55	61			36	131.56	208.43	125.44	121	86	193	99	107	166	224	139	141
37	84.75	98.76	96.23	100	75	90	80	100	90	100	100	100			37	91.44	74.88	72.86	66	78	59	60	61	106	86	90	75
38	63.39	68.92	59.34	36.83	55	60	55	35	66	100	61	41			38	116.9	110.13	143.11	198.88	54	89	109	157	173	132	161	303
39	40.22	40.1	38.52	40.07	40	40	35	40	41	41	41	41			39	242	188.11	241.63	207.13	242	159	186	171	242	244	323	241
40	78.5	44.84	50.18	81.54	45	44	39	65	100	46	61	100			40	100.5	192.29	144.3	103.8	42	149	108	52	208	213	198	156
41	71.51	53.2	45.07	57.78	50	45	45	50	93	65	45	60			41	124.2	148.57	167.1	129.25	60	120	159	101	175	166	181	148
42	44.9	35.2	45.12	37.39	40	35	44	35	100	35	46	50			42	199.11	210.83	172.38	223.33	151	197	159	153	255	221	184	257
43	67.28	47.23	45.94	53.97	60	45	40	45	100	60	50	60			43	110.89	151.3	164.11	131.71	84	120	141	106	131	218	186	156
44	68.33	47.82	56.14	36.95	60	45	49	35	100	50	97	41			44	108.33	156.57	135	209.29	89	146	111	167	153	166	167	252
45	47.78	50.13	40.48	50.72	45	49	40	35	99	50	91	60			45	174.22	135.43	187	153.33	120	120	149	111	222	150	209	196
46	63.02	55.32	60.23	52.44	57	50	50	49	72	62	66	99			46	127	131.86	130.86	162.71	115	111	97	119	158	148	150	224
47	46.59	63.28	54.44	32.68	45	62	49	30	50	64	60	100			47	149.71	127.13	152.5	307.17	134	114	140	250	165	142	165	377
48	55.58	53.44	84.74	90.88	45	49	79	90	80	70	100	100			48	125.56	122.63	87.63	82	89	108	80	74	163	133	99	94
49	69.84	44.86	46.61	40.11	45	40	45	40	86	45	50	41			49	124.22	146	151.11	196.4	70	133	139	170	195	168	179	242
50	47.47	46.3	60.23	83.07	44.9	44.5	54.7	69.8	50.3	55.5	100	100			50	155.56	153.25	107.14	85.9	128	137	87	74	196	177	123	96
51	51.91	68.11	75.12	60.69	35	60	75	50	100	100	76	100			51	168.71	94.2	94.29	122.44	117	87	84	101	207	102	103	153
52	70.87	65.86	51.93	39.24	50	50	40	35	100	100	100	40			52	118.86	143.63	153.6	190.25	88	122	122	177	151	161	172	210
53	96.87	84.48	82.29	35.65	98	71	69	35	100	98	87	36			53	62.3	74.3	84.5	243.78	47	64	74	228	83	86	119	260
54	64.32	58.33	48.58	40.06	55	55	45	40	70	61	100	40			54	108.71	118.5	149.67	188.13	104	97	129	171	122	136	161	202
55	88.12	89.31	97.21	48.25	72	72	83	45	100	100	100	56			55	63.36	67.43	71	165.38	56	62	53	158	82	77	84	175
56	71.58	87.85	40.38	40.58	68	79	40	40	98	91	45	45			56	94.11	93.29	183.88	180.2	77	88	167	169	115	101	205	188
57	41.15	51.12	58.69	45.37	35	45	54	40	50	61	61	65			57	190.1	144.5	136.86	183.56	332	118	108	151	118	178	175	267
58	79.45	72.79	49.83	52.37	74.7	64.7	44.9	44.7	100	75.4	60.3	60.9			58	97.7	111.18	132.44	146.71	84	99	108	115	108	120	148	177
59	73.23	55.93	66.1	45.47	60	45	60	40	100	99	100	55			59	99.14	140.9	118.18	169.9	65	123	102	119	124	162	166	196
60	78.33	48.48	56.19	47.47	45	45	50	44	100	55	65	51			60	95.56	169	135.27	186.78	63	132	96	129	151	204	169	304
61	83.89	60.03	51.31	38.33	71	56	50	36	100	67	56	100			61	104.11	128.22	153.33	202.57	87	118	138	181	151	142	161	226
62	63.04	65.12	54.75	52.42	59	64	49	50	100	70	95	100			62	108	114	145.14	131.13	96	104	127	121	125	131	154	142
63	71.69	64.69	55.53	70.18	64.7	54.9	49.8	69.7	75.2	70.4	60.2	70.2			63	105	129.1	134.78	101	84	100	110	87	127	154	149	111
64	73.66	69.31	46.84	40.17	65	60	44	40	98	80	51	41			64	99.71	108.29	165.86	203	89	91	150	189	112	130	182	225
65	57.36	55.35	48.49	36.44	55	50	45	35	60	60	51	100			65	124.25	128.5	150.71	227.17	103	110	135	203	143	157	168	249
66	77.25	56.18	69.98	65.03	65	55	65	65	95	61	76	66			66	94.6	128.75	94.2	125.17	62	119	86	113	152	140	106	135
67	48.43	45.32	45.45	51.64	45	45	45	45	61	46	46	56			67	145.5	153.5	144.25	131.86	106	133	125	123	169	162	154	143
68	76.98	55.27	71.98	74.44	65	45	65	65	100	60	80	100			68	89.38	138.22	117.63	98.33	76	118	104	72	102	162	140	135
69	62.52	50.02	45.22	36.29	55	50	40	35	95	50	50	40			69	127.5	157.86	176.86	212.3	97	146	150	179	146	167	203	230
70	98.26	82.28	64.41		85	60	45		100	100	80				70	67.92	100.83	137.13		57	70	93		91	159	190
71	61.06	59.49	72.71	100	39	55	70	100	100	70	100	100			71	112.22	109.6	92.7	68.78	77	90	81	59	155	138	109	74
72	40.92	41.08	38.19	40.08	35	39	35	35	100	87	45	45			72	212.33	226.5	216.42	216.86	175	199	179	189	260	257	311	252
73	47.46	42.46	41.62	49.37	44	39	40	44	100	45	45	54			73	181.22	183.82	207.22	144.78	132	137	189	91	232	217	227	182
74	61.04	40.01	37.11	49.32	44	40	35	40	71	41	40	75			74	126.6	172.4	205.13	158.29	105	158	184	104	144	190	223	210
75	48.78	53.71	49.98	35.87	35	40	40	35	100	61	55	40			75	178.56	115.78	154.9	186.2	94	80	123	67	304	171	177	238
76	32.61	39.25	55.78	36.42	30	30	48	35	69	46	63	41			76	301.5	180	115.86	194.63	251	154	98	168	328	232	130	239
77	55.31	58.87	56.03	66.27	50	55	50	60	66	60	61	100			77	144.75	131.22	144.63	105	75	108	110	95	166	157	183	126
78	51.29	42.56	32.11	45	50	40	30	45	60	45	35	45			78	142	177.38	212.14	157.86	135	157	206	139	149	196	222	169
79	50.28	65.21	61.76	37.68	50	60	59	35	51	100	70	41			79	137.33	104.4	125.2	211.63	110	84	105	192	152	134	145	223
80	45.11	41.41	54.35	44.94	35	40	50	40	51	46	100	46			80	149.33	159.67	121.86	162	104	140	110	144	185	182	139	170
81	41.44	46.08	35.14	31.88	30	40	35	30	55	50	36	40			81	232.89	169.25	204.13	298.14	142	135	174	167	337	204	229	380
82	69.29	87.34	90.21	64.52	55	75	85	59	100	100	100	100			82	105.6	81	77.44	115.29	96	73	70	101	120	89	91	128
83	71.08	48.6	61.43	49.7	60.1	44.9	55.1	45	100	50.4	65.2	50.3			83	108.64	152.63	113.86	155.22	85	143	88	144	170	174	146	183
84	49.84	54.67	60.22	75.03	49.3	49.2	58.7	68.7	50.2	55.5	60.2	90.1			84	147.33	139.83	117.33	89.78	130	123	110	64	181	167	126	110
85	47.19	71.14	85.22	59.94	40	68	79	59	100	71	100	60			85	162.14	99	73.29	126.86	56	81	70	107	219	110	81	146
86	57.93	48.42	46.12	45.4	50	41	41	41	62	51	51	52			86	137.6	149.88	169	165.5	109	131	162	152	168	173	177	180
87	69.2	55.08	45.17	37.95	64	50	41	36	100	65	47	41			87	93.83	143.14	166	217	39	121	153	201	110	173	176	249
88	69.64	40.27	40.07	30.65	50	34	40	30	100	55	41	35			88	102.5	202.14	205.25	253.22	75	169	183	182	116	232	230	288
89	78.68	99.97	99.53	98.98	74	94	96	97	81	100	100	99			89	85.44	60.8	66.67	62.11	66	53	62	51	101	68	71	69
90	58.86	75.11	73.87	72.62	50.2	74.3	70	65	100	75.4	75.7	75.5			90	116.22	92.27	103.5	106.17	101	86	86	98	123	109	114	115
91	53.17	76.74	76.04	56.12	41	54	74	50	100	100	80	60			91	136.5	107.86	90.33	133.38	122	86	79	114	176	132	99	160
92	70.79	52.83	50.1	50.86	59.5	44.9	49.3	44.6	100	64.4	50.8	55.3			92	102.63	132.75	147	139.63	81	123	125	117	130	140	170	155
93	80.64	78.73	78.7		79.6	69.8	74.7		85.3	100	85.4				93	94.67	101	96.56		47	77	83		115	125	125
94	91.13	100	100	100	75	100	100	100	100	100	100	100			94	67.78	60.67	51	59.17	54	56	47	46	91	64	55	71
95	61.44	55.71	40.77	45.63	50	50	40	44	100	61	100	50			95	117.3	126.73	196.33	187.33	50	99	155	160	193	158	219	244
96	43.06	35.11	38.42	30.18	41	30	35	30	65	36	51	30			96	178.13	229.83	226.11	272.6	147	186	166	200	203	300	268	325
97	62.93	54.84	62.98	40.76	51	53	46	36	83	56	100	47			97	99.62	118.71	112.67	192.22	66	113	99	165	115	128	139	240
98	71.39	60.44	58.45	35.76	60	59	54	35	100	65	61	40			98	101.25	131	147.83	208.88	57	120	131	175	126	142	166	231
99	56.17	39.76	44.66	83.73	45	35	40	80	100	45	51	85			99	145.3	185.17	159.78	88.73	100	168	129	81	183	196	209	98
100	57.8	88.6	90.14	96.79	50	80	85	90	100	100	94	100			100	104.5	70.29	76.38	62.67	89	61	70	56	115	91	90	73
101	75.83	59.93	71.46	49.99	70.2	49.7	49.8	44.4	91.1	100	100	56			101	93	123.25	100.38	147	69	113	82	75	101	140	111	191
102	56.48	49.07	50.37	57.08	50	45	49	54	100	51	51	60			102	155.57	170.63	147	137.86	117	151	133	125	208	214	176	156
103	51.18	51.46	55.81	50.62	46	45	55	46	70	51	60	51			103	153.7	163.25	137	171.44	99	152	129	153	178	188	148	202
104	56.02	74.14	61.28	63.44	45	61	60	55	100	100	70	100			104	135	91.7	106.1	114.13	73	70	84	85	258	107	118	136
105	57.49	47.36	42.56	47.62	44.7	44.6	29.4	44.8	65.6	50.2	93	55.6			105	158.78	167.14	277.67	220.5	98	145	210	156	217	186	338	288
106	49.21	39.09	42.81	46.96	45.5	29.7	35.8	39.3	50.8	45.7	50.9	60.5			106	158.38	200.7	175.5	169.09	142	146	137	108	202	241	212	220
107	69.85	76.44	72.97	58.67	65	60	55	50	80	100	100	60			107	90.67	115.57	120	144.29	81	91	93	121	113	167	158	188
108	66.4				49				80						108	133.17				98				230
109	85.81	39.45	35.65	31.95	70	30	30	30	100	50	50	35			109	112.44	219.13	267.44	309.29	60	166	237	265	160	270	297	349
110	65.47	65.15	50.28	50.6	59.8	58.6	50	44.4	70.2	70.2	63.6	51			110	106	105.88	137	159.11	85	96	130	129	142	120	147	254
111	56.52	46.92	45.48	49.7	49	44	44	44	65	59	55	60			111	134.7	189.56	158.13	165.63	104	128	125	137	180	244	215	185
112	81.75	64.79	46.88	50.75	66	60	44	45	100	66	100	100			112	97.7	119.4	199.5	133.5	77	96	143	91	130	150	287	160
113	37.44	41.85	36.67	37.87	31	40	30	35	70	99	45	99			113	243.78	204.45	233	265	183	170	197	195	317	240	274	330
114	39.6	35.67	40.77	35.11	35	35	35	34	50	41	45	45			114	220.17	237.56	184.5	250.43	99	207	166	202	257	303	210	349
115	54.01	53.59	36	35.89	31	41	36	35	100	100	36	36			115	197.88	190	264.13	236.13	94	134	197	174	266	241	317	286
116	61.75	72.87	84.14	44.95	60	65	70	39	70	75	100	100			116	115.75	103.25	92.38	190	97	93	65	137	132	116	114	231
117	71.74	78.92	66.89	41.47	59.6	69.4	59.5	39.7	100	80.5	70.4	55.2			117	83.78	82.22	99	156.18	64	73	67	85	106	103	120	199
118	75.23	77.37	59.02	49.46	65	60	54	45	100	100	61	51			118	136	119.8	136.75	148.14	69	79	120	138	203	156	151	160
119	67.27	76.54	70.25	46.13	60	70	64	44	70	85	75	55			119	133.85	99.8	129.22	195.71	92	74	100	125	232	143	154	249
120	58.5	70.49	55.26	40.87	50	65	50	30	100	100	100	100			120	149.8	107.82	156.25	181.82	80	70	119	114	202	141	194	257
121	35.62	43.38	47.8	51.04	29.9	34.6	44.2	49.2	99.9	45.1	100	55.1			121	213.38	190.89	162.29	153.25	172	152	148	131	250	316	193	188
122	52.43	71.24	66.5	87.78	39	45	55	75	80	100	70	95			122	151.14	102.64	105.78	83.5	133	42	91	66	189	206	136	103
123	49.93	44.13	55.82	52.04	44	44	44	44	55	44	100	65			123	153.13	148	138.38	154.5	104	139	123	81	199	172	153	190
124	56.61	55.26	49.02	56.23	45	49	40	50	72	70	100	100			124	126.9	140	145.75	131.33	63	119	113	120	178	157	186	143
125	51.77	40.17	49.79	52.65	44.9	39.5	45	45	60.1	40.3	50.4	65.2			125	159.33	190.43	137.73	138.25	128	168	103	112	189	216	163	168
126	59.15	66.91	83.44	44.36	50	60	80	35	70	100	90	100			126	142.64	112.14	84.11	190.5	82	102	66	129	195	121	106	220
127	57.52	48.37	46.96	63.8	39.9	39.5	34.7	54.7	74.2	65.5	55.7	79.9			127	163.22	169.63	176.78	143.18	74	120	132	119	218	207	214	190
128	39.53	45.85	61.67	46.59	30	35	45	40	40	55	66	50			128	219.5	197.57	128.5	158.75	174	156	111	87	250	296	154	185
129	61.28	58.36	40.82	33.2	55	55	35	30	65	61	46	35			129	131.27	130.5	176.25	296.5	101	123	155	281	211	151	202	357
PEEP (mbar)	average				min				max						RMV (L/min)	average				min				max
Pat-Nr	0-24h	48-72h	96-120h	216-240h	0-24h	48-72h	96-120h	216-240h	0-24h	48-72h	96-120h	216-240h			Pat-Nr	0-24h	48-72h	96-120h	216-240h	0-24h	48-72h	96-120h	216-240h	0-24h	48-72h	96-120h	216-240h
1	18.62	16.54	17.43	16.45	18.3	16.3	17.3	16	19	16.8	17.7	17.7			1	3.19	3.39	3.24	3.42	2.56	2.73	2.73	2.22	5.23	4.3	4.37	7.81
2	15.59	15.39	14.68	13.62	15.4	14.5	14.3	13.5	15.8	15.8	15.9	13.8			2	2.43	2.41	2.24	2.81	1.15	1.61	1.93	2.24	11.62	3.29	2.49	3.27
3	12.72	13.33	15.15	15.22	11.8	12.7	7.8	14.7	12.7	13.7	18.6	15.7			3	3.14	3.2	4.45	2.93	2.37	2.12	3	1.39	3.99	4.8	5	4.08
4	15.58	15.55	15.08	12.65	15.2	14.6	14.1	12.5	16.7	15.9	15.8	12.8			4	3.65	2.08	3.24	3.01	3.4	1.42	2.33	2.67	5.89	3.28	3.8	3.69
5	11.29	9.78	9.72	8.69	6.8	9.5	9.4	8.4	13.6	9.9	9.8	8.9			5	2.63	3.22	3.52	3.85	1.63	2.79	3.27	3.33	4.44	3.91	4.01	4.51
6	19.58	19.4	18.53	17.66	19.5	18.6	18.5	17.3	19.7	19.8	19.8	19.3			6	4.64	6.79	6.65	5.01	3.66	5.98	4.16	3.6	5.54	7.72	10.82	6.39
7	13.73	11.85	14.69		13.7	9.8	14.7		13.7	13.7	15.7				7	7.08	5.63	3.37		5.92	5	2.61		8.31	6.53	6.92
8	13.56	13.81	16.31	14.78	10.7	12.6	15.5	14.6	14.9	16.9	16.9	14.9			8	3.8	3.46	2.12	3.06	2.6	2.8	1.8	2.4	7.9	5.5	2.7	4.6
9	19.64	19.09	17.78	18.37	17.7	18.6	17.7	12.7	24.5	19.6	19.6	20.6			9	4.74	5.55	5.11	6.72	3.57	4.32	2.09	4.17	6.58	6.54	6.11	8.87
10	14.57	14.59	13.6	7.4	13.6	14.2	12.4	6.4	14.9	14.9	14.9	8.7			10	5.68	4.06	4.01	3.4	2.97	2.95	3.27	2.21	10.15	7.26	5.52	3.75
11	11.45	9.7	9.66	12.6	9.4	9.4	9.3	10.7	17.7	9.9	10	12.9			11	2.67	2.97	2.09	2.02	1.79	2.15	1.36	0.33	6.93	3.46	2.6	2.52
12	11.74	9.73	8.3	4.95	10.5	8.4	6.1	4.3	12.7	11.1	9.1	18			12	1.73	6.04	8.7	11.64	1.45	1.31	5.79	7.58	2.89	10.76	11.56	18.87
13	16.37	14.38	12.96	9.06	16.2	14.2	11.2	8.7	16.6	14.6	14.5	9.5			13	2.62	2.94	2.94	3	1.99	1.34	2.6	2.62	4.89	3.42	3.12	3.4
14	17.06	18.67	17.18	13.76	16.4	18.1	16.6	12.8	18.5	18.9	17.8	13.9			14	3.32	4.77	3.58	6.17	3	4.2	2.5	5.7	5.3	5.8	4	7.2
15	15.57	16.04	15.43	13.58	15.2	14.6	14.3	13.4	15.7	18.7	15.7	13.7			15	2.49	3.06	4.69	4.73	1.85	2.1	3.33	3.74	3.92	5.77	6.01	7.03
16	13.61	12.64	12.64	9.78	12.6	12.4	12.6	7.3	14	12.8	12.7	11.7			16	1.61	1.24	1.3	1.84	1.32	1.04	0.9	1.21	5.4	1.59	1.66	2.87
17	15.53	14.59	14.61	15.31	15.3	14.3	14.3	14.1	15.7	14.7	14.8	15.7			17	3	3.03	3.14	2.43	2.95	2.93	2.97	1.23	3.14	3.67	3.67	3.09
18	12.48	10.69	9.23	6.68	12.4	9.3	8.3	6	12.7	11.8	9.8	7.8			18	2.6	2.71	2.85	4.2	2.6	2.5	2.4	3.4	2.6	5.1	4.8	7.1
19	19.68	19.59	18.49	16.48	19	19.2	18.3	15.4	21.6	19.9	20.1	17.1			19	2.45	2.76	5.04	6.4	1.44	1.81	3.67	1.9	3.72	3.81	6.62	9.95
20	19.47	17	14.11	11.28	19.2	15.4	11.5	7.6	19.9	17.9	14.9	12.4			20	0.99	2.13	6.08	8.31	0.66	1.41	4.55	5.01	3.01	3.39	7.08	15.83
21	12.54	12.74	12.75	12.71	9.8	12.7	12.7	12.7	12.7	12.7	12.7	12.7			21	2.12	0.61	0.59	0.82	1.49	0.4	0.48	0.71	4.76	1.06	0.68	1.34
22	13.57	10.65	9.32	4.81	12.6	10.5	6.7	4.5	14.6	10.9	9.8	6.2			22	3.26	3.69	5.51	8.14	2.73	3.18	4.02	4.51	4.71	4.77	6.78	13.14
23	14.79	12.03	9.86	7.71	13	10.8	9.1	7.3	15.5	12.8	10.8	7.9			23	6.67	5.26	5	5.04	5.96	4.9	4.29	4.66	8.88	5.8	6.66	5.82
24	13.63	13.62	13.65	14.43	13.5	13.4	13.5	12.5	13.7	13.7	13.8	15			24	4.25	3.46	4.97	7.31	3.55	3.08	3.07	5.81	9.96	4.14	5.66	8.91
25	17.25	15.73	13.57	13.52	16.4	14.5	13.2	13.2	17.7	16.7	15.3	13.6			25	2.12	1.45	1.26	1.92	1.43	1.3	1.02	1.47	4.51	1.55	2.39	3
26	11.7	13.03	12.12	13.74	10.4	7.4	11.6	13.2	13.4	14.9	14.8	14.8			26	1.42	1.27	0.77	2.79	0.52	0.05	0.57	1.29	4.79	2.28	0.94	7.27
27	11.77	13.46	13.65		9.5	11.5	12.8		15.7	13.8	14				27	2.28	5.91	6.86		1	1.6	5.9		3.5	6.6	8
28	15.49	15.8	15.86	11.92	14.4	15.4	15.5	10.6	16.2	16.1	16.3	12.4			28	4.19	4.16	4.7	6.4	2.7	3.8	4.1	4.3	4.9	4.7	6	9.2
29	14.43	13.67	13.32	10.33	13.6	13.5	12.7	10.1	14.8	13.8	13.8	12.2			29	2.79	3.51	4.28	9.34	2.38	3.22	3.7	6.5	3.78	4.04	5.65	11.5
30	15.36	18.12	16.46	17.43	14.4	17.3	16.2	16.3	17.6	19.4	16.8	18.4			30	1.81	1.63	1.84	2.37	1.45	1.06	0.96	1.95	4.49	2.19	2.64	3.07
31	14.56	13.59	12.62	9.69	14.4	13.3	12.4	6.8	14.9	13.8	12.7	10			31	2.29	2.26	2.2	2.34	1.82	2.08	1.98	1.59	5.94	2.66	2.88	5.12
32	12.57	12.48	9.31	5.77	12.3	11.4	8.4	5.6	12.7	12.7	10.8	6.1			32	1.61	1.92	2.2	4.33	0.17	1.74	1.89	1.13	3.07	2.48	2.52	4.94
33	15.54	14.71	14.65	14.15	15.1	14.1	14.1	11.7	15.7	15.6	15.7	15			33	2.31	3.76	3.99	8.23	2.07	2.07	2.76	6.77	2.87	6.41	7.31	10.36
34	8.02	9.53	9.88	9.66	6.6	8.5	9.6	9.3	8.8	9.8	10.1	10			34	2.15	4.75	4.91	2.36	1.9	4.5	4.4	2.1	3.6	5.7	6.3	3.2
35	16.48	14.71	14.78	12.73	15.6	14.4	14.5	12.2	16.8	15	16	15.1			35	2.82	2.8	3	3.16	2.38	1.97	1.98	2.56	3.25	3.84	4.25	5.3
36	15.55	14.49	14.46	14.59	15.3	13.7	13	14.3	16.1	15.4	15.9	14.8			36	3.63	3.76	3.22	2.78	3.13	2.81	2.47	2.23	6.69	5.49	6.76	3.68
37	11.6	15.09	15.46	15.22	11.3	14.4	15.2	12.1	14.5	15.7	15.7	16.6			37	3.84	3.21	2.63	2.01	3.44	2.46	2.18	1.38	5.75	3.6	3.56	3.12
38	14.58	14.51	14.58	12.55	14.3	14.3	14.5	11	15.6	14.6	14.7	13.5			38	2.38	2.1	2.49	4.54	1.14	1.69	2.16	3	5.21	2.46	4.06	6.5
39	12.68	9.62	8.72	9.31	12.4	6.7	8.5	5.9	13	10.1	8.9	9.9			39	4.33	2.81	3.13	2.75	4	2.49	2.26	2.31	5.67	3.74	4.11	3.5
40	15.13	16.25	15.09	14.37	11.5	16.2	14.2	14.1	19.3	16.5	15.6	14.5			40	1.04	0.7	0.63	0.59	0.53	0.49	0.5	0.45	6.53	0.81	0.91	0.68
41	18.84	19.38	17.16	14.58	17.3	19	15.9	13.9	19.5	19.6	17.6	14.8			41	2.75	2.56	2.8	3.32	2.01	2.36	2.49	2.66	6.69	2.84	4.01	3.72
42	12.51	8.78	7.75	5.81	11.6	8.3	7.6	5.5	12.7	8.9	7.9	5.9			42	2.73	2.61	2.53	4.74	0.32	2.45	2.5	4.01	3.37	3.4	3.33	4.84
43	13.42	12.88	12.14	11.78	12.7	12.4	10.7	11.4	14.7	13.7	12.9	12.1			43	2.06	1.52	1.47	1.25	1.07	1.17	1.17	1.01	3.55	2.38	2.12	1.62
44	13.53	11.81	11.89	10.34	12.4	11.4	11.6	9.7	13.7	12.7	12.7	10.8			44	1.68	1.8	2.98	3.78	1.28	1.42	2.37	3.38	2.09	2.08	3.65	4.25
45	16.54	17.5	16.2	12.2	16.2	16.2	15.1	11.3	18	18.7	17.5	12.8			45	2.83	3.52	3.41	3.07	1.99	2.57	1.94	2	4.15	4.73	4.86	4.57
46	14.88	13.73	13.73	12.75	13.7	13.7	13.7	12.7	15.7	13.7	13.7	12.7			46	2.02	1.55	1.69	1.6	1.59	1.09	1.54	1.25	4.16	2.55	1.85	5.3
47	14.7	14.7	14.7	10.85	14.7	14.7	14.7	9.8	14.7	14.7	14.7	11.8			47	1.86	2.2	2.58	3.3	1.71	1.61	2.25	2.71	2.39	2.74	3.31	5.09
48	15.79	15.68	15.58	15.5	14.5	15.4	15.2	15.3	17.6	15.8	15.9	15.8			48	3.09	3.19	2.11	2.43	2.11	2.54	1.93	2.2	6.1	4.13	2.63	2.78
49	14.65	14.63	14.65	13.26	14.2	14.4	14.5	12.3	14.9	14.8	14.7	16			49	4.64	4.07	4.2	4.75	3.55	3.67	3.88	3.43	6.55	6.07	5.2	7.03
50	14.6	10.85	11.68	5.49	14.3	10.4	10.5	4.6	18	11.8	12.9	6.6			50	3.64	6.04	6	5.08	3.1	4.8	3.8	3	7	7.7	7.6	8.8
51	14.27	13.69	14.58	12.66	13.5	13.5	14.4	12.5	14.9	13.8	14.7	12.8			51	3.5	1.59	1.63	1.55	2.12	0.52	1.36	1.25	5.51	1.9	2.2	2.32
52	9.87	9.66	9.7	8.87	8.7	7.8	9.6	8.6	13.1	10.2	10.2	9.1			52	3.43	3.15	2.69	3.8	0.35	0.62	2.34	3.34	4.5	3.84	3.16	4.73
53	13.64	14.71	14.71	12.1	7.8	14.7	14.7	10.8	17.7	14.7	14.7	12.7			53	0.94	1.1	1.48	5.52	0.33	0.98	1.32	3.29	5.17	1.29	1.98	8.44
54	12.62	12.64	12.62	8.75	12.4	12.4	12.3	8.5	12.9	13.9	12.9	9			54	2.39	1.85	1.9	2.37	2.12	1.41	0.87	2.05	3.2	2.69	3.47	3.13
55	5.56	6.76	13.75	10.69	3.9	4.9	13.7	9.8	6.9	7.8	14.7	10.8			55	13.73	15.38	6.01	6.16	6.15	12.62	3.47	5.11	21.18	32.71	9.64	9.21
56	15.74	15.68	15.43	12.48	15.7	15.5	14.5	11.4	17.7	16.1	15.9	13.3			56	2.06	2.37	2.46	3.82	1.51	2.2	2.02	3.19	3.24	2.87	2.75	6.3
57	15.13	14.92	14.6	4.84	11.6	11.7	14.4	4.4	17.7	15.7	14.8	5.1			57	2.37	2.55	3.18	3.17	1.85	1.63	2.59	2.57	3.3	5.01	4.42	3.39
58	13.66	13.73	13.28	9.83	13.2	13.4	12.5	9.7	13.9	13.9	13.9	10			58	3.2	2.68	2.78	3.19	2.2	2.5	2.3	2.4	4.6	3.1	3.6	7.5
59	14.57	13.69	12.65	13.05	13.7	13.5	12.4	12.5	14.9	13.9	12.8	13.8			59	5.86	6.26	4.98	5.55	3.57	3.26	4.24	4.09	6.91	6.73	6.03	6.27
60	10.87	9.55	9.6	8.66	9.9	9.3	9.2	8.1	11.9	10	10	9.2			60	0.63	0.86	0.78	0.93	0.53	0.6	0.66	0.74	1.04	1.69	0.97	1.15
61	14.72	14.71	14.56	12.51	14.7	14.7	13.7	11.8	14.7	14.7	14.7	12.7			61	3.8	2.52	2.24	2.68	3.2	2.2	1.69	2.29	5.22	3.01	2.73	3.91
62	14.61	14.6	13.64	13.67	14.4	14.3	13.2	5.3	14.7	14.8	13.9	14.1			62	1.59	1.32	1.82	2.41	1.16	1.19	1.55	2.04	2.12	1.68	2.25	4.04
63	13.84	13.71	12.73	11.25	13.4	12.9	12.3	9.6	15	14	12.9	12.3			63	3.56	2.8	3.92	8.15	2.8	2.5	3.2	5.6	8.3	3.7	5	10.1
64	14.55	14.48	12.56	12.57	12	13.8	12.5	12.4	14.8	14.9	12.8	12.9			64	2.02	1.16	1.13	2.81	1.34	0.76	0.98	2.45	3.59	1.32	1.18	4.15
65	14.66	14.62	14.6	13.48	12.7	14.3	14.2	12.5	15	14.9	14.9	13.9			65	1.05	1.37	1.25	2.06	0.96	1.15	1.11	1.57	2.81	1.62	1.61	3.43
66	16.09	17.36	16.04	14.33	13.7	16.4	14.4	13.2	20.5	17.7	16.7	15.1			66	3.02	2.73	2.4	3.49	0.42	2.25	2.09	2.94	7.69	3.13	3.04	4.9
67	10.01	9.5	8.69	8.66	9.4	9.3	8.3	8.2	12.1	10.4	9.1	9.1			67	2.43	2.62	2.69	3.87	2.27	2.29	2.31	3.42	4.37	3.1	3.81	4.59
68	19.55	23.21	21.14	18.85	16.6	22.3	20.1	17.6	23.7	24.4	21.8	19.8			68	3.44	5.27	5.24	5.48	2.39	5.05	4.62	5.15	4.33	8.13	8.25	5.94
69	14.67	14.66	13.51	10.54	13.7	14.5	12.7	9.5	14.8	14.8	13.9	11.6			69	4.33	5.3	5.15	5.28	3.73	4.62	4.19	4.22	10.01	6.11	5.52	8.06
70	5.1	6.41	5.43		4	0.3	4.1		5.7	7.1	7				70	10.71	9.03	8.62		3.24	4.47	3.65		21.2	26.5	22.27
71	14.68	13.84	14.13	14.62	13.7	13.7	9.8	13.7	22.6	13.7	23.5	14.7			71	2.41	3.13	3.96	1.71	1.67	2.24	2.77	0.88	4.7	3.57	6.49	3.74
72	13.66	9.34	7.67	7.25	11.8	8.5	7.5	6.4	14.8	10.4	7.9	7.8			72	3.88	4.63	5.23	6.34	3.34	2.07	3.63	5.01	5.31	7.67	10.64	10.11
73	13.2	9.44	7.78	5.77	12.5	8.4	6.6	5.6	13.7	10.7	9.1	5.9			73	2.59	2.64	4.12	5.22	2.42	2.42	3.48	3.46	3.56	3.71	5.61	7.22
74	14.71	14.7	13.48	9.56	14.3	14.4	12.7	9.4	14.8	14.9	13.9	10.7			74	3.6	4.03	4.93	7.5	3.04	3.18	3.95	5.05	4.07	5.14	6.45	12.86
75	14.58	13.67	13.58	12.17	14.2	12.7	13.4	11.7	14.7	14.6	14.2	12.9			75	2.84	2	2.97	4.53	2.16	0.92	2.44	4.09	4.55	2.66	4.09	4.93
76	12.75	11.68	12.43	10.88	12.7	10.8	10.8	3.9	12.7	11.8	12.7	11.8			76	1.95	2.43	1.29	2.83	1.55	1.29	0.97	1.98	2.42	4.47	2.39	7.29
77	17.71	13.65	13.9	14.55	15	13.3	13.4	14.3	20.7	14.6	16.6	14.7			77	3.33	2.74	2.4	3.56	2.11	2.34	1.89	2.23	4.03	4.16	3.73	4.27
78	16.6	15.92	13.36	10.82	16.4	14.7	12.7	10.5	16.8	16.9	13.9	11			78	2.16	4.01	5.32	5.36	1.44	2.64	4.96	4.72	2.65	5.72	5.81	5.82
79	12.64	11.44	9.91	7.79	12.5	9.7	9.5	7.5	12.7	12.7	11.8	8.5			79	1.15	0.94	0.94	3.72	0.94	0.83	0.59	3.18	1.53	1.21	1.3	5.55
80	14.56	14.21	14.51	13.5	14.2	14.2	14.1	4.2	15.9	14.8	15.3	14			80	2.45	1.91	1.63	4.39	1.38	1.47	1.12	2.94	7.19	4.08	2.66	6.23
81	13.57	10.74	9.76	7.39	9.7	9	9.5	6.6	19.7	11	9.9	8.8			81	3.33	4.04	3.12	6.76	2.04	3.34	2.37	5.32	6.84	6.6	4.07	7.55
82	14.58	14.51	14.6	12.6	14.1	12	14.2	12.4	14.9	15	15.1	12.9			82	1.98	1.44	1.11	0.99	1.59	1	0.85	0.9	6.1	2.4	1.39	1.17
83	11.02	13.58	13.54	13.47	9.4	13.2	13.3	11.9	15.8	13.7	13.8	13.8			83	1.54	1.41	1.44	1.94	1	1	1.2	1.7	7.4	2.1	1.6	2.5
84	14.14	13.47	13.82	14.49	13.4	13.1	13.2	13.5	14.8	13.7	15.2	16.6			84	2.44	1.48	2.03	2.52	2.2	1.4	1.7	2.1	4.6	1.9	2.8	3
85	10.15	11.38	11.79	11.72	9.6	11.4	11.5	10.7	14.8	12.1	12.7	12.8			85	2.12	2.04	1.29	2.08	1.22	1.17	0.93	1.8	3.26	3.73	1.49	2.27
86	13.71	11.48	11.58	8.82	13.7	9.8	10.8	8.8	13.7	12.7	11.8	8.8			86	1.73	2.63	2.37	4.37	1.24	1.6	2.21	3.83	5.51	4.45	2.74	4.8
87	9.8	9.81	8.84	9.81	9.8	9.8	8.8	9.8	9.8	9.8	9.8	9.8			87	2.05	0.91	1.04	1.45	1.23	0.73	0.76	0.78	9.26	1.11	1.43	1.92
88	14.76	14.73	14.38	10.73	14.3	14.2	12.4	10.3	17.3	15	15	11.5			88	1.61	3.66	4.67	5.98	1.27	3.29	3.57	4.59	2.49	4.08	5.75	7.71
89	18.63	18.63	18.63	12.32	18.6	18.6	18.6	9.8	18.6	19.6	18.6	12.7			89	1.71	1.02	1.88	1.8	1.39	0.72	1.44	0.81	5.47	2.1	2.48	2.72
90	14.7	14.64	14.63	11.71	14.5	14.4	14.4	10.9	17	15	15	12			90	2.56	2.36	2.33	3.45	1.9	2	2.1	3.1	12.2	2.6	2.8	4.1
91	13.62	13.62	13.68	12.08	13.5	13.5	13.5	11.3	13.8	13.8	13.8	12.7			91	2.62	1.35	0.87	2.39	1.64	0.66	0.69	2.13	5.17	2.22	1.12	2.62
92	14.55	14.42	13.61	11.64	10.2	13.4	13.3	11.4	15	19.1	13.9	12			92	3.68	3.13	3.87	3.44	2.87	2.14	2.75	2.75	4.98	4.24	11.71	5.11
93	13.7	13.7	13.79		13	10.9	13.2		14.7	15.1	14.7				93	4.37	5.39	3.88		3.9	3.1	3.2		6.3	10.4	5
94	11.85	11.63	15.3	14.54	7.6	11.4	13.4	14.3	13.9	12	15.8	14.7			94	2.83	1.24	1.14	0.92	2.26	1.03	0.89	0.79	3.97	1.54	1.45	1.03
95	14.42	14.44	10.67	5.08	14.1	14.1	9.2	4.6	14.9	14.9	11.8	6			95	0.99	1.15	1.62	2.64	0.71	0.91	0.92	2.01	5.47	1.63	2.38	4.16
96	14.69	14.68	14.72	12.7	14.5	14.5	14.6	11.7	14.8	14.8	14.9	14.5			96	2.64	3.36	3.91	11.25	1.78	2.74	3.26	9.25	3.29	4.66	6.75	13.67
97	11.71	11.77	13.21	11.94	9.8	11.8	11.8	10.8	13.7	11.8	13.7	12.7			97	1.71	0.85	0.47	2.13	1.26	0.63	0.22	1.67	6.36	1.02	0.85	2.66
98	15.64	17.29	15.5	15.61	15.5	15.6	15.4	15.4	15.9	17.7	15.8	15.8			98	3.37	2.7	2.77	3.42	2.35	2.35	2.6	2.93	5.06	3.06	3.45	3.88
99	15.59	13.55	12.03	15.54	15.4	12.6	11.4	15.3	15.9	14.6	12.7	16.3			99	2.31	2.05	2.04	1.2	1.74	1.88	1.71	0.97	8.46	2.29	2.43	1.37
100	12.84	15.17	16.56	15.7	12.5	12.9	16.4	15.3	14.8	16.8	16.9	16.3			100	2.21	1.42	1.59	0.94	1.63	0.34	1.4	0.77	9.89	2.19	1.91	1.89
101															101	1.65	3.04	3.61	5.59	0.5	1	2.7	2.5	3.6	3.6	4.7	11.2
102	16.73	16.79	16.74	13.75	16.6	16.6	16	13.5	17	17.8	17	15.1			102	4.19	4.34	3.73	3.29	3.26	3.93	3.37	3.07	5.09	5.39	4.35	3.57
103															103	4.96	6.27	7.2	3.5	4.39	4.4	7	2.87	5.35	6.51	7.47	6.08
104	15.59	16.21	14.61	13.62	14.9	14.4	14.3	13.4	17.5	17.7	15	14.1			104	3.67	2.52	1.56	0.95	1.96	1.69	1.2	0.62	11.22	4.04	2.24	1.55
105	15.57	15.65	14.32	11.56	12.5	15.4	12.8	10.8	16	16	14.8	12.1			105	3.68	3.84	5.06	13.49	2.6	3.6	4.3	9	13.9	4.2	6.5	17.4
106	12.17	12.51	11.23	10	11.4	12.2	10.5	9.5	13.8	12.9	12	10.8			106	1.63	1.47	1.29	2.94	1.3	1.1	1.1	2.5	3	2.2	1.8	3.8
107	16.65	16.65	15.69	15.64	16.4	16.5	15.5	15.5	16.8	16.9	16	16			107	3.89	4.56	4.73	4.85	2.98	3.14	3.4	4.3	5.75	7.24	6.64	5.18
108	15.67				15.4				15.9						108	4.8				4.02				5.7
109	16.19	15.79	15.77	13.43	15.5	15.3	15.6	12.7	19.6	16	16.8	14.8			109	5.44	4.84	5.47	9.22	3.11	2.32	3.33	8.61	6.66	5.79	9.42	10.05
110	14.59	13.59	13.54	12.41	14.5	13.2	13.4	11.7	16.6	13.8	13.8	13.1			110	3.13	2.63	2.72	2.82	2.9	2	2	1.1	11.7	3.1	3.6	4.2
111	14.52	11.39	6.28	7.68	14.3	10.6	5.7	7.5	14.8	12.8	6.9	7.9			111	0.92	1.04	1.22	1.34	0.86	0.69	1.05	1.08	8.06	1.73	1.49	1.62
112	11.15	10.37	12.57	10.59	9.4	8.5	10.7	9.6	12.3	15.2	13.9	13.2			112	1.04	1.68	2.42	1.9	0.82	0.8	1.57	1.1	8.01	4.85	3.81	2.53
113	15.71	15.34	14.71	14.38	15.7	14.7	14.7	13.7	15.7	15.7	14.7	14.7			113	3.8	4.89	4.88	7.01	2.95	3.96	3.73	3.43	8.8	6.75	5.35	8.01
114	15.02	9.89	7.85	8.38	14.3	8.8	7.7	7.6	17.6	10.8	7.9	9			114	4.03	5.04	6.85	9.46	3.12	4.34	3.9	6.36	8.47	5.65	11.54	14.74
115	19.61	19.4	15.62	9.39	19.6	18.6	14.7	8.8	19.6	20.6	16.7	9.8			115	1.9	3.63	5.49	9.44	1.05	2.1	4.49	5.83	3.3	6.04	6.67	15.63
116	14.02	12.7	11.09	11.78	12	11.7	5.1	11.6	15.1	13.9	12	12.2			116	5.63	5.28	5.22	4.27	3.64	4.13	3.92	2.36	11.77	6.08	6.45	5.15
117	16.4	15.61	14.56	8.57	14.4	15.4	13.6	7.7	17.8	15.8	15	9.1			117	3.43	3.27	3.84	3.05	2.3	2.4	3.4	2.2	13.9	3.8	4.2	4.2
118	10.9	13.55	13.56	13.5	10.1	13.1	13.1	12.7	13.4	13.8	13.9	14			118	3.99	3.31	2.87	2.76	2.45	2.34	2.51	2.48	4.52	3.83	3.24	5.38
119	14.17	14.46	14.47	14.54	13.5	14.3	14.4	14.4	14.8	17.3	14.6	14.6			119	2.66	3.1	2.53	2.93	1.65	2.52	2.37	2.52	3.9	3.79	2.74	2.96
120	15.32	13.79	13.5	12.94	14.6	13.2	12.9	12	18.4	14.9	14.1	13.2			120	3.44	2.58	4.73	4.95	2.72	1.95	3.18	3.45	4.8	3.5	6.72	5.97
121	14.07	13.38	12.55	12.18	13.1	12.6	12.3	6.9	14.5	13.8	13	14			121	3.52	3.4	3.42	6.34	3.3	2.8	3.2	5.3	14.1	3.7	3.7	7.9
122	15.69	14.04	17.67	13.98	15.7	10.8	16.7	12.7	15.7	16.7	18.6	14.7			122	4.33	4.68	3.94	4.74	4.1	3.09	2.54	4	5.27	10.5	6.99	6.37
123	13.74	12.74	15.01	8.8	13.7	12.7	12.7	7.8	13.7	12.7	15.7	8.8			123	2.82	2.25	2.4	2.73	1.7	1.4	2	1.8	4.5	4.5	3.1	3.1
124	12.28	18.71	15.02	14.71	11.8	16.7	13.7	14.7	16.7	20.6	15.7	14.7			124	2.71	4.75	3.71	4.09	2	4	3	3.7	8.8	6	6	6.1
125	13.28	9.94	8.6	9.48	12.4	9.1	8.3	9.1	14.5	10.6	9.7	10			125	4.53	3.79	3.83	2.65	3.6	3.4	3.2	2.2	6	4.4	5.2	3.3
126	15.57	15.7	14.73	12.66	14.6	15.6	14.6	12.3	16.8	15.8	14.9	13.1			126	4.82	4.89	7.53	12.03	3.77	4.03	6.47	7.04	5.8	6.46	9.74	15.18
127	14.69	14.68	14.7	14.46	13.8	14	13.9	11.5	15.1	14.8	15.2	14.8			127	5.61	7.44	7.65	11.89	3.4	5.9	5.8	9.6	7.9	10.6	12	15.5
128	12.52	12.83	13.61	13.67	12.4	11.4	13.3	11.9	13.3	13.5	14.1	14.1			128	4.64	6.09	5.95	6.45	2.56	3.83	5.28	5.63	6.77	17.72	9.04	7.77
129	15.59	15.59	15.6	14.2	15.5	15.4	15.4	13.6	15.9	15.8	15.7	14.9			129	2.7	2.42	2.41	8.5	2.37	2.36	2.38	7.06	4.02	2.86	2.9	9.64
VT (mL)	average														pPeak (mbar)	average				min				max
Pat-Nr	0-24h	48-72h	96-120h	216-240h											Pat-Nr	0-24h	48-72h	96-120h	216-240h	0-24h	48-72h	96-120h	216-240h	0-24h	48-72h	96-120h	216-240h
1	228.8	274.02	231.91	261.75											1	26.82	26	27.63	27.54	22	26	27	26	30	26	29	28
2	202.56	200.07	184.74	216.49											2	23.92	24.08	23.46	24.71	20	24	23	24	29	25	26	27
3	313.92	248.44	371.1	244.25											3	23.28	26.04	26.92	28.29	16	25	15	27	24	27	31	29
4	349.78	228.15	378.93	301.3											4	26.42	27.04	27.71	24.33	26	27	27	24	30	28	29	25
5	281.6	214.66	234.68	253.31											5	29.32	29.29	29.58	29.42	23	29	29	28	32	30	32	31
6	425.09	453.35	443.32	294.38											6	30	29.83	29.13	29	30	29	29	28	30	31	30	30
7	436.43	413.35	219.04												7	27.38	24.96	27.92		27	22	27		28	27	30
8	297.97	219.05	175.65	218											8	24.75	26.35	28.52	29.09	18.9	24.9	27.9	28.9	27.4	31.3	31	29.8
9	354.84	461.65	398.41	395.83											9	28.79	29.54	27.96	30.58	28	28	20	27	32	31	30	32
10	293.78	195.34	171.32	212.8											10	25.83	24.96	26.96	22.875	23	24	26	20	33	29	29	26
11	228.96	288.3	199.29	197.03											11	20.4	19.38	21.25	22.63	16	17	21	15	30	21	23	23
12	247.32	455.71	642.76	706.35											12	22.42	24.22	27.96	18.04	21	16	23	7	24	33	33	31
13	368.38	301.69	293.08	243.48											13	26	24	23.79	22.04	24	24	22	21	29	24	25	23
14	459.43	420.07	447.14	398.7											14	27.15	27.33	27.51	25.05	26.2	26.9	26.8	24.2	29.8	28.8	28.1	26.1
15	327.33	415.61	334.54	324.35											15	23.96	26.33	25.58	26.42	22	25	24	26	26	30	28	30
16	156.32	139.48	140.21	207.84											16	25.75	23.58	23.29	24.58	24	23	23	22	44	29	29	26
17	249.9	251.51	253.94	202.3											17	28.87	28.33	27.08	27.92	27	28	25	27	31	30	29	30
18	258.76	257.63	223.11	315.42											18	23.48	22.03	20.08	20.71	21.5	20.6	18.8	19.7	24.8	23.5	22	22.5
19	155.43	222.33	303.58	289.08											19	29.38	35.79	33.67	31.5	26	33	33	20	40	40	34	35
20	97.67	213.52	290.71	281.91											20	25.63	26.13	26.75	26	25	25	24	25	28	27	28	29
21	158.97	76.98	73.91	92.8											21	23.5	23.29	24.21	25.67	23	22	24	25	24	25	25	26
22	300.35	368.36	620.2	818.19											22	25.68	24	21.25	15.17	22	24	18	14	32	24	23	17
23	378.1	346.92	293.27	335.86											23	26.09	23.53	21.67	23.75	24	22	21	23	28	25	22	25
24	325.98	266.06	338.6	391.34											24	21.09	21	23.75	27.96	21	21	21	26	23	21	30	29
25	248.67	180.32	148.13	186.54											25	27.52	24.5	22.71	25.63	25	23	22	25	33	26	28	30
26	112.27	116.89	72.66	85.33											26	21.64	22.83	21.79	27.21	18	17	20	24	29	35	24	31
27	228.05	220.2	229.59												27	24.67	29.96	30.61		23.6	25.9	29.9		30.4	31	31.3
28	209.76	208.02	234.86	314.85											28	23.99	24.62	25.4	22.53	22.6	23.9	24.8	20.7	25.6	25.5	27.7	26.4
29	263.28	290.89	356.42	414.06											29	22	22.13	21.83	20.63	22	22	21	19	22	23	27	21
30	250.49	161.9	122.17	237.21											30	25.13	26.67	30	27.75	24	26	30	26	33	28	30	29
31	250.25	249.19	241.3	234.36											31	23.74	21.58	20.63	17.75	21	21	20	17	44	22	22	20
32	162.45	174.87	200.1	331.8											32	21.08	21.96	18.67	20.54	21	21	18	19	23	22	20	22
33	182	267.45	284.05	403.66											33	24.75	22.17	23.17	24.88	24	22	22	16	25	23	26	31
34	153.44	338.49	400.89	194.61											34	13.53	22.23	23.78	20.65	11.9	20.9	22.9	19.8	14.4	24.4	26.2	23
35	225.58	223.76	240.43	242.54											35	22.86	22.42	23.38	21.67	22	21	19	19	23	24	25	22
36	309.55	322.43	269.95	165.45											36	25.14	24.79	25.63	25.25	24	24	24	24	27	28	29	28
37	375.92	321.93	263.88	193.93											37	22.09	27.13	26.83	25.5	22	24	26	25	24	28	28	27
38	236.59	209.21	247.14	338.71											38	24.46	25	25.46	23.13	24	25	25	21	28	25	31	26
39	402.84	271.18	205.45	275.08											39	24.64	18.88	19.79	22.29	24	18	18	22	25	20	22	23
40	110.78	61.04	54.37	54.5											40	27.42	26.96	25.92	25	20	26	25	25	33	27	27	25
41	271.26	255.7	270.19	276.22											41	29.68	30	27.79	26.08	28	30	27	26	33	30	28	27
42	268.14	259.33	252.32	362.63											42	22.96	20.25	20.83	22.38	16	17	20	19	25	22	22	24
43	214.71	151.41	163.83	124.55											43	24.68	23.58	24.25	23.54	24	23	22	23	25	27	25	24
44	166.33	138.13	228.81	287.55											44	22.83	20.29	21.08	20.83	16	20	20	20	24	23	22	22
45	263.94	289.74	304.3	232.64											45	27.65	27.63	26.46	22.88	24	26	25	21	31	29	30	25
46	196.46	154.98	157.88	144.48											46	27.09	24.42	24.21	23.25	24	24	24	19	33	29	25	24
47	128.49	138.91	188.1	220											47	26.44	26.63	26.58	22.92	26	26	26	21	29	27	27	25
48	286.26	318.52	207.92	218											48	26.17	28.88	27.88	28.29	25	28	22	28	28	30	30	30
49	438.04	402.74	406.66	344.44											49	27.87	28.46	28.42	27.58	26	28	28	25	34	34	29	33
50	353.74	401.8	328.15	225.2											50	25.19	26.32	27.79	27.25	24.8	24.8	25.7	22	30.3	27.4	30.3	31.7
51	340.84	186.76	193.38	196.53											51	22.7	20.71	22.04	21.46	19	20	22	21	25	21	23	23
52	292.16	309.15	241.31	248.87											52	22.96	22.25	20.71	19.88	16	14	20	18	32	24	21	22
53	72.46	104.51	148.53	342.02											53	22.13	26.96	27.63	25.08	17	25	27	24	26	28	28	26
54	236.39	180.88	184.36	235.69											54	23.59	23.5	23.54	20.25	23	23	23	20	28	26	24	21
55	521.84	580.24	293.52	404.14											55	15.77	11.43	27.63	22.17	13	8	24	20	17	12	31	27
56	205.39	157.84	162.78	250.33											56	26.68	27.33	26.71	23.33	24	26	26	20	31	28	28	25
57	234.52	215.55	172.84	156.42											57	24.83	26.17	27.67	20.79	20	22	26	20	29	28	31	23
58	245.13	171.37	166.12	217.95											58	22.74	22.01	21.63	19.17	21.7	21.8	20.8	17.9	23.3	22.5	23.2	22.4
59	389.83	416.73	325.09	462.59											59	28.05	27.13	25.13	25.63	27	27	25	25	29	28	26	27
60	59.46	74.31	78.08	92.83											60	20.78	20.13	19.83	18.63	18	19	19	18	23	24	22	19
61	306.04	209.06	186.36	220.07											61	25.81	24.79	24.67	24.08	25	24	24	22	26	25	25	25
62	151.44	130.17	165.41	239.81											62	22.83	22.67	23.21	25.29	22	22	22	24	29	23	28	26
63	265.46	233.09	185.08	301.67											63	23.26	22.06	24.02	27.68	21.8	21.8	22.8	25.6	29	22.6	28.1	30.3
64	177.66	115.85	112.37	187.46											64	30.09	25.75	23.17	25.58	25	25	22	25	33	27	24	27
65	98.14	114.26	104.72	158.22											65	23.83	27.04	27.88	28.38	21	26	26	28	28	28	28	29
66	155.88	151.75	133.47	192.17											66	27.45	27.17	25.38	25.5	25	26	25	25	36	28	26	26
67	240.34	227.01	246.8	231.46											67	23.13	22.79	23.25	22.96	22	22	22	22	24	24	25	25
68	242.45	292.46	289.84	261.68											68	28	31.92	30.33	31.58	24	29	27	28	34	33	36	35
69	425	530.37	444.25	416.68											69	24.38	24	21.38	18.96	23	24	19	18	28	24	22	24
70	391.43	548.98	497.4												70	15	17.14	14.92		11	12	11		19	18	17
71	275.84	386.58	297.84	104.39											71	26.09	27.67	25.88	22.71	24	26	22	22	28	32	28	25
72	235.81	296.06	305.49	390											72	27.73	22.75	21.08	23.79	22	20	19	22	33	29	28	26
73	254.75	250.69	385.13	461.14											73	21.95	18.38	18.83	18.96	20	16	17	18	23	23	22	20
74	289.29	309.84	405.15	500.75											74	22.32	22.79	22.5	23.38	22	22	21	19	23	25	25	27
75	190.69	158.35	229.78	330.06											75	25.82	24.67	24.54	25.5	24	23	24	24	31	27	26	27
76	226.1	198.45	127.09	194.51											76	21.39	20.13	22.88	27	21	19	21	26	23	23	25	28
77	275.74	225.92	193.92	226.03											77	30.65	26.54	26.79	29.08	28	26	26	27	34	28	32	31
78	210.25	329.41	373.07	364.17											78	22.1	24.04	22.67	21.63	22	24	22	21	23	25	24	22
79	172.14	187.91	186.74	425.24											79	22.18	21.88	20.38	19.67	21	20	20	15	23	24	22	21
80	199.2	160.91	140.69	260.17											80	23.88	23.04	23.21	28.04	22	22	23	27	33	24	24	29
81	329.17	358.47	269.68	579.53											81	21.09	19.88	18.33	17.21	15	19	18	16	28	26	19	19
82	124.12	96.2	73.52	97.78											82	27.13	26.38	26.17	24.04	26	25	26	23	32	27	27	25
83	165.65	144.86	146.57	162.33											83	22.5	25.14	25.44	25.82	18.9	23.7	25.2	25.3	31.5	26.5	25.8	26.4
84	280.15	216.16	180.21	207.92											84	23.16	22.83	23.36	25.24	22	21.8	22	23.9	25	28.2	28.2	30.8
85	200.1	197.9	129.27	193.17											85	20.65	23.5	24.83	24.71	19	23	23	23	28	24	26	26
86	214.61	237.82	197.73	306.57											86	21.75	21.33	22.33	24.25	18	18	22	23	23	23	23	25
87	171.49	135.74	155.64	190.41											87	19.83	18.54	18.33	20.67	18	18	18	20	27	19	22	21
88	152.8	207.66	263.93	307.03											88	26.61	27.13	26.58	21.83	25	26	26	21	31	28	28	23
89	179.41	101.48	187.97	120.49											89	24.26	24.29	26.88	24.46	24	22	26	19	30	31	29	27
90	245.81	202.75	196.91	265.21											90	24.44	24.23	24.23	23.2	22.9	23.9	23.9	21.9	31.4	24.9	24.7	24.5
91	254.1	135.71	86.72	238.91											91	22	22.83	22	21.48	21	22	22	20	23	23	22	24
92	366.45	300.55	327.03	325.61											92	24.36	24.44	23.75	21.57	24	23	23	21	25	31.3	25	22.9
93	341.87	312.01	258.55												93	26.74	25.73	26.4		25.1	22.9	25.3		30.4	29.3	27.6
94	253.21	122.67	130.47	107.27											94	23.14	27.5	28.08	26.74	17	25	25	26	27	29	29	29
95	80.2	86.27	134.51	146.65											95	24.54	25.71	21.83	15.96	23	24	20	15	29	27	26	19
96	246.06	335.28	352.01	601.13											96	22	22	22.13	23.71	22	22	22	21	22	22	24	26
97	112.63	84.02	46.96	184.56											97	25.04	23.33	24.5	25.83	24	23	23	25	32	24	27	27
98	213.69	225.53	230.29	225.3											98	31.27	31.25	30.96	29.25	30	30	30	28	33	32	32	30
99	211.96	205.04	136.58	120.79											99	28.04	24.96	24.17	27.79	27	23	23	27	32	26	28	28
100	197.78	141.61	157.03	66.35											100	24.38	29.5	31.21	24.83	21	28	30	18	31	32	34	28
101	175.04	302.8	321.66	381.98											101	23.4	25.08	26.8	26.11	21.7	24.8	24.7	23.1	27.4	27.4	29.6	28.3
102	301.35	283.86	243.62	213.85											102	27.58	28.42	28.96	30.21	27	28	28	29	29	29	30	32
103	330.46	348.3	361.06	287.64											103	23.81	26.29	26.67	22.88	15.4	24	24	22	26	30	33	25
104	320.02	241.89	155.08	94.11											104	27.5	30.25	27.79	25	25	27	26	24	31	33	28	26
105	209.7	190.75	288.88	536.26											105	26.48	26.16	26.86	23.09	23.8	25.2	24.9	21.6	31.4	26.5	28.5	21.4
106	186.99	184.37	160.89	350.09											106	17.24	18.21	17.16	20.63	15.7	17.9	16.8	19.9	19.2	19.7	19	21.5
107	344.15	397.29	298.56	497.69											107	25.16	27.83	27.29	27.54	24	26	25	27	27	33	34	28
108	361.42														108	31.83				30				35
109	349.85	312.71	403.6	460.04											109	31	26.13	26	25.54	26	26	25	24	35	29	27	27
110	247.86	228.25	221.19	197.48											110	21.69	21	21.53	17	19.9	19	20.7	13.7	28	22.1	22	19.9
111	90.58	103.54	121.88	133.18											111	20.74	18.13	15.54	17.08	19	16	15	17	28	20	16	18
112	102.3	100.1	136.43	110.38											112	21.25	24.29	27.88	26.54	19	19	25	24	31	29	32	30
113	345.6	348.53	349.6	437.02											113	24.4	24.17	24.38	25.25	24	24	24	23	26	26	25	26
114	362.15	481.99	484.94	581.68											114	24.21	20.46	19.42	19.58	22	18	18	11	30	26	20	22
115	183.3	349.84	543.34	708.57											115	24.63	26.96	25.17	16.63	24	24	25	15	30	30	26	18
116	215.44	226.27	207.08	207.07											116	24.21	25.42	24.96	26.67	16	23	24	23	31	28	29	28
117	222.64	218.17	255.98	272.22											117	27.02	26.24	24.92	18.58	24.7	25.9	24	17	33.6	26.8	25.5	20.5
118	185.34	146.1	134.13	159.94											118	28.09	29.86	29.75	25.25	26	29	29	25	34	31	32	26
119	209.32	301.47	265.95	282.97											119	26.41	29.17	29	26.33	20	28	29	26	30	32	29	27
120	167.17	171.08	290.7	197.31											120	30.23	30	28.67	28.92	29	29	27	28	35	32	31	29
121	351.19	340.1	342.39	312.6											121	34.48	28.91	27.36	27.14	31.2	26.8	26.8	25.6	38.9	30.3	28.3	28.4
122	362.3	390.18	361.42	346.06											122	24.23	25.5	28.08	27.96	24	22	26	27	26	29	30	29
123	338.08	239.9	239.13	155.09											123	24.41	22.88	30.33	23.88	23	22	28	21	26	24	32	25
124	327.97	478.82	450.78	367.69											124	20.91	26.54			19	24			29	28
125	321.62	220.92	244.78	154.24											125	29.05	23	24.69	25.69	27	21.7	22.9	23	34.1	24.3	27.1	27
126	437.18	363.94	453.32	732.2											126	27.39	25.79	31.25	22.58	26	25	31	21	29	28	32	24
127	453.87	427.14	425.96	461.53											127	24.98	24.68	25.4	30.3	20	23.9	23.8	28.6	30.4	28.2	29.8	32.3
128	250.27	313.16	337.7	291.36											128	25.59	27.83	30.25	30.96	21	26	29	30	30	29	34	36
129	314.74	301.58	300.33	447											129	25.74	24.75	24.04	24.17	25	24	22	21	28	25	25	26

## Sheet: scores, fever
TISS						SAPS						Fever
Pat-Nr	0-24h	48-72h	96-120h	216-240h		Pat-Nr	0-24h	48-72h	96-120h	216-240h		Pat-Nr	0-24h	48-72h	96-120h	216-240h
1		10	10	15		1		36	31	34		1	0	0	0	0
2	15	10	10	10		2	25	23	22	17		2	0	0	0	0
3	15	15	15	15		3	25	25	16	30		3	0	0	0	0
4	15	15	15	10		4	23	23	23	23		4	1	0	0	0
5		10	10	10		5		25	18	22		5	0	0	0	0
6	10	10	10	10		6	15	31	27	28		6	0	0	0	0
7		15	15	28		7		22	24	51		7	0	0	1	0
8		15	10	19		8		21	18	18		8	0	0	0	0
9	24			15		9	29			23		9	1	0	0	0
10	19	10	14	15		10	36	26	26	25		10	1	0	0	0
11		15	19	15		11		16	29	16		11	0	0	0	0
12	15	15	10	15		12	17	24	25	16		12	0	0	0	0
13		10	13	19		13		26	18	25		13	1	0	0	0
14	20	15	10	18		14	27	27	28	43		14	0	0	0	0
15	28	19	13	15		15	29	26	32	29		15	0	0	0	0
16	15	20	15	19		16	31	17	23	30		16	1	0	0	0
17		15	14	14		17		23	12	35		17	0	0	0	0
18	19	10	10	10		18	29	27	26	26		18	0	0	0	0
19	17.5	10	10	10		19	33	17	16	15		19	0	0	0	0
20	15	10	10	10		20	27	17	28	24		20	1	0	0	1
21		10	14	10		21		31	18	18		21	0	0	0	0
22		10	15	10		22		18	23	22		22	0	0	0	0
23		15	15	10		23		28	25	21		23	0	0	0	0
24		10	10	15		24		31	23	21		24	1	0	0	0
25		10	10	14		25		23	34	25		25	0	0	0	0
26		19	19	15		26		28	24	26		26	0	0	0	0
27		10	15			27		31	23			27	1	0	0
28		14	10	10		28		10	19	14		28	0		0	0
29		19	15	10		29		19	18	36		29	0	0	0	1
30		10	15	10		30		15	17	21		30	0	0	0	1
31		15	10	10		31		29	19	32		31	0	0	0	0
32	15	10	10	15		32	40	31	22	30		32	0	0	0	0
33		15	10	10		33		8	13	26		33	1	0	0	0
34	24	15	10	10		34	30	27	25	25		34	0	0	0	0
35		10	10	15		35		23	23	16		35	1	0	0	0
36		10	10	10		36		24	18	20		36	1	0	0	0
37	15	10	19	14		37	32	25	25	26		37	0	0	0	0
38	15	10	10	10		38	21	21	17	16		38	0	0	0	1
39		13	13	18		39		14	36	38		39	0	0	0	0
40		10	10	24		40		17	17	33		40	0	0	0	0
41		13	13	15		41		23	20	31		41	0	0	0	0
42		10	10	10		42		17	12	17		42	0	0	0	0
43		10	15	19		43		16	23	33		43	0	0	0	0
44	15	10	15	15		44	25	23	23	31		44	1	0	0	0
45		15	15	15		45		34	23	18		45	0	1	1	0
46		15	10	10		46		16	16	27		46	0	0	0	0
47		14	10	15		47		21	23	22		47	0	0	0	0
48	19	10	10	15		48	41	28	37	32		48	0	0	0	0
49		10	14	14		49		23	26	16		49	1	0	0	0
50	10	15	10	15		50	19	17	11	20		50	0	0	0	0
51		15	10	10		51		25	36	30		51	0	0	0	0
52	20	15	15	15		52	36	17	16	23		52	0	0	0	0
53	20	15	10	10		53	37	25	25	25		53	0	0	0	0
54		10	15	10		54		25	17	22		54	0	0	0	0
55	15	10	19	15		55	18	13	31	18		55	0	0	0	0
56		10	10	10		56		21	17	23		56	0	0	0	0
57		15	10	15		57		17	24	23		57	0	0	0	0
58	15	10	15	10		58	27	16	18	23		58	0	0	0	0
59		15	15	19		59		24	21	14		59	1	0	1	0
60		14	15	10		60		28	34	18		60	1	0	0	0
61		10	10	15		61		23	30	16		61	1	0	0	0
62		15	10	10		62		17	17	23		62	0	0	0	0
63		15	10	15		63		19	25	18		63	0	0	0	0
64		10	10	10		64		17	26	16		64	1	0	0	0
65		14	10	10		65		17	16	21		65	0	0	0	0
66		15	10	15		66		20	28	23		66	0	0	0	0
67	15	10	10	15		67	21	22	33	36		67	0	0	0	0
68	10	14	15	15		68	16	24	25	27		68	0	0	0	0
69	20	10	10	10		69	26	26	31	30		69	0	0	0	0
70	15	10	10			70	33	33	33			70	0	0	0
71		10	10	14		71		31	23	23		71	0	0	0	0
72	10	10	14	15		72	20	15	9	19		72	0	0	0	0
73		10	10	10		73		20	23	23		73	0	0	0	0
74		10	10	10		74		17	16	24		74	0	0	0	0
75		10	10	10		75		12	17	20		75	1	0	0	0
76		10	15	10		76		21	22	19		76	0	0	0	0
77		10	18	10		77		16	17	25		77	0	0	0	0
78		10	14	10		78		17	19	16		78	0	0	0	0
79		10	10	10		79		19	40	24		79	0	0	0	0
80	20	10	10	10		80	25	16	19	32		80	0	0	0	0
81		14	14	10		81		19	19	16		81	0	0	0	0
82	24	15	19	19		82	31	18	17	22		82	0	0	0	0
83		10	10	10		83		16	18	25		83	0	0	0	0
84		10	10	19		84		26	16	19		84	1	0	0	0
85		10	15	10		85		18	21	16		85	0	0	0	0
86		10	10	10		86		25	21	21		86	0	0	0	0
87	32	10	10	15		87	35	19	22	16		87	0	0	0	0
88		10	15	10		88		20	16	13		88	0	0	1	0
89		15	15	10		89		30	23	17		89	1	0	0	0
90	17	10	15	15		90	28	25	28	18		90	0	0	0	0
91		15	10	24		91		20	22	28		91	0	0	0	0
92		18	18	18		92		36	42	30		92	0	0	0	0
93		13	18			93		37	37			93	0	0	0
94		10	14	14		94		21	27	55		94	0	0	0	0
95	23.5	19	10	10		95	26	17	23	22		95	0	0	0	0
96		14	19	21		96		26		37		96	0	0	0	0
97	15	10	10	15		97	24	20	20	19		97	0	0	0	0
98		15	10	10		98		17	14	11		98	0	0	0	0
99	15	10	15	14		99	27	23	23	22		99	0	0	0	0
100	15	15	10	14		100	21	21	21	27		100	0	0	0	0
101		15	10	23		101		17	14	25		101	0	0	0	0
102	20	10	10	10		102	28	21	24	25		102	0	0	0	0
103	19	10	10	15		103	39	23	23	31		103	1	0	0	0
104	17.5	15	10	20		104	34	25	25	27		104	0	0	0	0
105	26	26	13	13		105	52	38	39	45		105	0	0	0	0
106		10	10	14		106		23	22	23		106	0	0	0	0
107		14	10	23		107		25	30	18		107	1	1	0	0
108						108						108	0
109		15	15	10		109		21	17	20		109	0	0	0	1
110	23	14	14	26		110	34	37	40	31		110	0	0	0	0
111	24	14	14	14		111	19	35	25	24		111	0	0	0	0
112		13	13	13		112		32	33	44		112	0	0	0	0
113		10	10	15		113		17	23	19		113	0	0	0	1
114		10	10	10		114		14	18	16		114	1	0	1	0
115		19	10	10		115		17	23	30		115	1	0		1
116	20	15	15	19		116	27	27	26	26		116	1	0	0	0
117	19	14	10	10		117	28	27	25	20		117	0	0	0	0
118		22	17	22		118		37	38	42		118	0	0	0	0
119		10	15	10		119		22	31	35		119	0	0	0	0
120		10	15	13		120		19	19	47		120	0	0	0	0
121	20	14	14	10		121	29	21	31	25		121	1	0	1	0
122		14	15	18		122		23	23	27		122	0	1	0	0
123	24	14	14	18		123	28	33	25	32		123	0	0	0	0
124	14	18	14	14		124	29	31	33	21		124	1	0	0	0
125		10	19	15		125		16	14	16		125	0	0	0	0
126		14	10	15		126		33	28	20		126	1	0	0	0
127		10	10	15		127		29	29	27		127	1	0	0	1
128		14	10	10		128		27	25	21		128	0	0	0	0
129		10	10	10		129		20.5	16	18		129	0	0	0	0

## Sheet: medication, therapy
UFH/Argatroban (Enoxaparin)						ASS						RRT						ECMO
Pat-Nr	0-24h	48-72h	96-120h	216-240h		Pat-Nr	0-24h	48-72h	96-120h	216-240h		Pat-Nr	0-24h	48-72h	96-120h	216-240h		Pat-Nr	0-24h	48-72h	96-120h	216-240h
1	1	1	1	1		1	0	0	0	0		1	0	0	0	0		1	1	1	1	1
2	1	1	1	1		2	0	0	0	0		2	0	0	0	0		2	1	1	1	1
3	1	1	1	1		3	1	1	1	0		3	0	0	0	0		3	1	1	1	1
4	1	1	1	1		4	0	0	0	1		4	0	0	0	0		4	1	1	1	1
5	1	1	1	1		5	0	0	0	0		5	0	0	0	0		5	1	1	1	1
6	1	1	1	1		6	0	0	0	0		6	0	0	0	0		6	1	1	1	1
7	1	1	1	0		7	1	0	0	0		7	0	0	0	0		7	1	1	1	1
8	1	1	1	1		8	1	0	0	0		8	0	0	0	0		8	1	1	1	1
9	1	1	1	1		9	0	0	0	0		9	0	0	0	0		9	1	1	1	1
10	1	1	1	1		10	0	0	0	0		10	0	0	0	0		10	1	1	1	1
11	1	1	1	1		11	1	1	1	0		11	0	0	0	0		11	1	1	1	1
12	1	1	1	1		12	0	0	0	0		12	0	0	0	0		12	1	1	1	0
13	1	1	1	1		13	1	1	1	1		13	0	0	0	0		13	1	1	1	1
14	1	1	1	1		14	0	0	0	0		14	0	0	0	1		14	1	1	1	1
15	1	1	1	1		15	0	0	0	0		15	0	0	1	1		15	1	1	1	1
16	1	1	1	1		16	1	1	1	1		16	0	0	0	0		16	1	1	1	1
17	1	1	1	1		17	0	0	0	0		17	0	0	0	0		17	1	1	1	1
18	1	1	1	1		18	0	0	0	0		18	0	0	0	0		18	1	1	1	1
19	1	1	1	1		19	0	0	0	0		19	0	0	0	0		19	1	1	1	1
20	1	1	1	1		20	0	0	0	0		20	0	0	0	0		20	1	1	1	1
21	1	1	1	1		21	1	1	1	1		21	0	0	0	0		21	1	1	1	1
22	1	1	1	1		22	0	0	0	0		22	0	0	0	0		22	1	1	1	1
23	1	1	1	1		23	0	0	0	0		23	0	0	0	0		23	1	1	1	1
24	1	1	1	1		24	0	0	0	0		24	0	0	0	0		24	1	1	1	1
25	1	1	1	1		25	0	0	0	0		25	0	0	0	0		25	1	1	1	1
26	1	1	1	1		26	0	0	0	0		26	0	0	0	0		26	1	1	1	1
27	1	1	1			27	0	0	0			27	0	0	0			27	1	1	1
28	1	1	1	1		28	0	0	0	0		28	0	0	0	0		28	1	1	1	1
29	1	1	1	1		29	0	0	0	0		29	0	0	0	0		29	1	1	1	0
30	1	1	1	1		30	0	0	0	0		30	0	0	0	0		30	1	1	1	1
31	0	1	1	1		31	0	0	0	0		31	0	0	0	0		31	1	1	1	1
32	1	1	1	1		32	0	0	0	0		32	0	0	0	0		32	1	1	1	1
33	1	1	1	1		33	0	0	0	0		33	0	0	0	0		33	1	1	1	0
34	1	1	1	1		34	0	0	0	0		34	0	0	0	0		34	1	1	1	1
35	1	1	1	1		35	0	0	0	0		35	0	0	0	0		35	1	1	1	1
36	1	1	1	1		36	0	0	0	0		36	0	0	0	0		36	1	1	1	1
37	1	1	1	1		37	1	1	1	1		37	0	0	0	0		37	1	1	1	1
38	1	1	1	1		38	0	0	0	0		38	0	0	0	0		38	1	1	1	1
39	1	1	1	1		39	1	1	1	1		39	1	1	1	1		39	1	1	1	1
40	1	1	1	1		40	0	0	0	0		40	0	0	0	0		40	1	1	1	1
41	1	1	1	1		41	0	0	0	0		41	0	1	1	0		41	1	1	1	1
42	1	1	1	1		42	0	0	0	0		42	0	0	0	0		42	1	1	1	1
43	1	1	1	1		43	0	0	0	0		43	0	0	0	0		43	1	1	1	1
44	1	1	1	1		44	1	1	1	1		44	0	0	0	0		44	1	1	1	1
45	1	1	1	1		45	0	0	0	0		45	0	0	0	0		45	1	1	1	1
46	1	1	1	1		46	1	1	1	1		46	0	0	0	0		46	1	1	1	1
47	1	1	1	1		47	0	0	0	0		47	0	0	0	0		47	1	1	1	1
48	1	1	1	1		48	1	1	1	1		48	0	0	0	0		48	1	1	1	1
49	1	1	1	1		49	0	0	0	0		49	0	0	0	0		49	1	1	1	1
50	1	1	1	1		50	0	1	1	1		50	0	0	0	0		50	1	1	1	1
51	1	1	0	0		51	1	1	1	1		51	0	0	0	0		51	1	1	1	1
52	1	1	1	1		52	1	1	1	1		52	0	0	0	0		52	1	1	1	1
53	1	1	1	1		53	1	1	1	1		53	0	0	0	0		53	1	1	1	1
54	1	1	1	1		54	0	0	0	0		54	0	0	0	0		54	1	1	1	1
55	1	1	1	1		55	1	1	1	0		55	0	0	0	0		55	1	1	1	1
56	1	1	1	1		56	0	0	0	0		56	0	0	0	0		56	1	1	1	1
57	1	1	1	1		57	0	0	0	0		57	0	0	0	0		57	1	1	1	1
58	1	1	1	1		58	1	1	0	0		58	0	0	0	0		58	1	1	1	1
59	1	1	1	1		59	0	1	1	0		59	0	0	0	0		59	1	1	1	1
60	1	1	1	1		60	0	0	0	0		60	0	0	0	0		60	1	1	1	1
61	1	0	0	0		61	1	1	1	1		61	0	0	0	0		61	1	1	1	1
62	1	1	1	1		62	1	1	0	1		62	0	0	0	0		62	1	1	1	1
63	1	1	1	1		63	0	0	0	0		63	0	0	0	0		63	1	1	1	1
64	1	1	1	1		64	1	1	1	1		64	0	0	0	0		64	1	1	1	1
65	1	1	1	1		65	0	0	0	0		65	0	0	0	0		65	1	1	1	1
66	1	1	1	1		66	0	0	0	0		66	0	0	0	0		66	1	1	1	1
67	1	1	1	1		67	0	0	0	0		67	0	0	0	0		67	1	1	1	1
68	1	1	1	1		68	0	0	0	0		68	0	0	0	0		68	1	1	1	1
69	1	1	1	1		69	0	0	0	0		69	0	0	0	0		69	1	1	1	1
70	1	1	1			70	0	0	0			70	0	0	0			70	1	1	1
71	1	1	1	1		71	0	0	1	1		71	0	0	0	0		71	1	1	1	1
72	1	1	1	1		72	0	0	0	0		72	0	0	0	0		72	1	1	1	1
73	1	1	1	1		73	1	1	1	1		73	0	0	0	0		73	1	1	1	1
74	1	1	1	1		74	0	0	0	0		74	0	0	0	0		74	1	1	1	1
75	1	1	1	1		75	0	0	0	0		75	0	0	0	0		75	1	1	1	1
76	1	1	1	1		76	0	0	0	0		76	0	0	0	0		76	1	1	1	1
77	1	1	1	1		77	0	1	1	1		77	0	0	0	0		77	1	1	1	1
78	1	1	1	1		78	0	0	0	0		78	0	0	0	0		78	1	1	1	1
79	1	1	1	1		79	0	1	1	1		79	0	0	0	0		79	1	1	1	1
80	1	1	1	1		80	0	0	0	0		80	0	0	0	0		80	1	1	1	1
81	1	1	1	1		81	0	0	0	0		81	0	0	0	0		81	1	1	1	0
82	1	1	1	1		82	1	1	1	1		82	0	0	0	0		82	1	1	1	1
83	1	1	1	1		83	1	1	1	1		83	0	0	0	0		83	1	1	1	1
84	1	1	1	1		84	1	1	1	1		84	0	0	0	0		84	1	1	1	1
85	1	1	1	1		85	1	1	1	1		85	0	0	0	0		85	1	1	1	1
86	1	1	1	1		86	1	1	1	1		86	0	0	0	0		86	1	1	1	1
87	1	1	1	1		87	0	0	0	1		87	0	0	0	0		87	1	1	1	1
88	1	1	1	1		88	0	0	0	0		88	0	0	0	0		88	1	1	1	1
89	1	1	1	1		89	0	0	0	0		89	0	0	0	0		89	1	1	1	1
90	1	1	1	1		90	1	1	1	1		90	0	0	0	0		90	1	1	1	1
91	1	1	1	1		91	1	1	1	1		91	0	0	0	0		91	1	1	1	1
92	1	1	1	1		92	1	1	1	1		92	1	1	1	1		92	1	1	1	1
93	1	1	1			93	0	0	0			93	1	1	1			93	1	1	1
94	1	1	1	1		94	1	1	1	0		94	0	0	0	0		94	1	1	1	1
95	1	1	1	1		95	0	0	0	0		95	0	0	0	0		95	1	1	1	1
96	1	1	1	1		96	0	0	0	0		96	0	0	1	0		96	1	1	1	0
97	1	1	1	1		97	1	0	0	1		97	0	0	0	0		97	1	1	1	1
98	1	1	1	1		98	0	0	0	0		98	0	0	0	0		98	1	1	1	1
99	1	1	1	1		99	1	1	1	0		99	0	0	0	0		99	1	1	1	1
100	1	1	1	1		100	1	1	1	0		100	0	0	0	0		100	1	1	1	1
101	1	1	1	1		101	0	0	1	0		101	0	0	0	0		101	1	1	1	1
102	1	1	1	1		102	0	0	0	0		102	0	0	0	0		102	1	1	1	1
103	1	1	1	0		103	1	1	1	0		103	0	0	0	0		103	1	1	1	1
104	1	1	1	1		104	1	1	1	1		104	0	0	0	0		104	1	1	1	1
105	1	1	1	1		105	0	0	0	0		105	1	1	1	1		105	1	1	1	0
106	1	1	1	0		106	1	1	1	0		106	0	0	0	0		106	1	1	1	1
107	1	1	1	1		107	0	0	0	0		107	0	0	0	0		107	1	1	1	1
108	1					108	0					108	1					108	1
109	1	1	1	1		109	0	0	0	0		109	0	0	0	0		109	1	1	1	0
110	1	1	1	1		110	1	1	1	0		110	0	0	0	1		110	1	1	1	1
111	1	1	1	1		111	0	0	0	1		111	0	0	0	0		111	1	1	1	1
112	1	1	1	1		112	0	0	0	0		112	0	1	1	1		112	1	1	1	1
113	1	1	1	1		113	1	1	1	0		113	0	0	0	0		113	1	1	1	0
114	1	1	1	1		114	1	1	0	0		114	0	0	0	0		114	1	1	1	0
115	1	1	1	1		115	1	1	0	0		115	0	0	0	0		115	1	1	1	0
116	1	1	1	1		116	1	1	1	1		116	0	0	0	0		116	1	1	1	1
117	1	1	1	1		117	1	1	1	1		117	0	0	0	0		117	1	1	1	1
118	1	1	1	1		118	1	1	1	0		118	1	1	1	1		118	1	1	1	1
119	1	1	1	1		119	0	1	1	1		119	0	0	0	0		119	1	1	1	1
120	1	1	1	1		120	1	1	1	1		120	0	0	0	1		120	1	1	1	1
121	1	1	1	1		121	1	1	1	1		121	0	0	0	0		121	1	1	1	1
122	1	1	1	1		122	1	1	1	1		122	0	0	0	0		122	1	1	1	1
123	1	1	1	1		123	1	1	1	1		123	0	0	0	0		123	1	1	1	1
124	1	1	1	1		124	1	1	1	1		124	0	0	0	0		124	1	1	1	1
125	1	1	1	1		125	1	1	1	1		125	0	0	0	0		125	1	1	1	1
126	1	1	1	1		126	0	0	0	0		126	0	0	0	0		126	1	1	1	1
127	1	1	1	1		127	0	0	0	0		127	0	0	0	0		127	1	1	1	0
128	1	1	1	1		128	0	0	0	0		128	0	0	0	0		128	1	1	1	1
129	1	1	1	1		129	0	0	0	0		129	0	0	0	0		129	1	1	1	1
