# Supplementary material for: Prognostic factors for favorable outcomes after veno-venous extracorporeal membrane oxygenation in critical care patients with COVID-19
Source: PLoS One. 2023 Jan 20;18(1):e0280502. doi: 10.1371/journal.pone.0280502 (PMC9858373; doi:10.1371/journal.pone.0280502)
Supplement: S2 Appendix — (XLSX) [file pone.0280502.s002.xlsx]

## Sheet: Tabelle1
Pat-ID	System	Outcome (0=survivor, 1=died)	Height	Weight	BMI	Pump	Oxygenator	Number MO	Cannula outflow	Location	Cannula inflow	Location	Number EC	Number plasma	Number TC
2727	V-v ECMO	0	190	90	24.9	DP 3	Hilite LT	1	Maquet 23Fr 38cm	V. femoralis	Maquet 21Fr 15cm	V. jugularis	0	0	0
2726	V-v ECMO	1	178	95	30	DP 3	Hilite LT	1	Maquet 21Fr 38cm	V. femoralis	Maquet 19 Fr 15cm	V. jugularis	9	0	0
2720	V-v ECMO	1	170	75	26	DP 3	Hilite LT	1	Maquet 21Fr 38cm	V. femoralis	Maquet 19 Fr 15cm	V. jugularis	0	0	0
2719	V-v ECMO	0	175	95	31	Rotaflow	PLS	3	Maquet 21Fr 38cm	V. femoralis	Maquet 19 Fr 15cm	V. jugularis	3	0	0
2718	V-v ECMO	1	170	85	29.4	Cardiohelp	Cardiohelp 7.0	1	Maquet 21Fr 38cm	V. femoralis	Maquet 19 Fr 15cm	V. jugularis	4	0	0
2716	V-v ECMO	0	185	110	32.1	Cardiohelp	Cardiohelp 7.0	2	Maquet 23Fr 38cm	V. femoralis	Maquet 21Fr 15cm	V. jugularis	0	0	0
2714	V-v ECMO	1	188	110	31.1	Cardiohelp	Cardiohelp 7.0	3	Maquet 23Fr 38cm	V. femoralis	Maquet 19 Fr 15cm	V. jugularis	0	0	0
2713	V-v ECMO	0	184	110	32.5	Cardiohelp	Cardiohelp 7.0	3	Maquet 23Fr 38cm	V. femoralis	Maquet 19 Fr 15cm	V. jugularis	7	0	0
2710	V-v ECMO	0	195	130	34.2	Rotaflow	Paragon	3	Maquet 21Fr 38cm	V. femoralis	Maquet 21Fr 15cm	V. jugularis	6	3	0
2709	V-v ECMO	0	184	85	25.1	Rotaflow	PLS	1	Maquet 23Fr 38cm	V. femoralis	Maquet 19 Fr 15cm	V. jugularis	1	0	0
2707	V-v ECMO	0	188	100	28.3	Cardiohelp	Cardiohelp IR	2	Maquet 23Fr 38cm	V. femoralis	Maquet 21Fr 15cm	V. jugularis	8	0	0
2706	V-v ECMO	0	186	88	25.4	DP 3	Nautilus	1	Maquet 21Fr 38cm	V. femoralis	Maquet 19 Fr 15cm	V. jugularis	0	0	0
2704	V-v ECMO	0	185	130	38	Cardiohelp	Cardiohelp 7.0	1	Maquet 23Fr 38cm	V. femoralis	Maquet 19 Fr 15cm	V. jugularis	0	0	0
2702	V-v ECMO	1	185	110	32.1	Rotaflow	Nautilus	1	Maquet 23Fr 38cm	V. femoralis	Maquet 21Fr 15cm	V. jugularis	3	0	0
2698	V-v ECMO	0	185	95	27.8	Rotaflow	Paragon	5	Maquet 23Fr 38cm	V. femoralis	Maquet 21Fr 15cm	V. jugularis	7	0	0
2695	V-v ECMO	0	160	110	43	DP 3	Hilite LT	2	Maquet 21Fr 38cm	V. femoralis	Maquet 19 Fr 15cm	V. jugularis	5	0	0
2694	V-v ECMO	0	176	120	38.7	Cardiohelp	Cardiohelp 7.0	3	Maquet 23Fr 38cm	V. femoralis	Maquet 19 Fr 15cm	V. jugularis	30	6	2
2692	V-v ECMO	0	180	140	43.2	DP 3	Hilite LT	1	Maquet 23Fr 38cm	V. femoralis	Maquet 21Fr 15cm	V. jugularis	12	7	1
2691	V-v ECMO	0	165	140	51.4	Rotaflow	Paragon	1	Paraglide 27	V. Jugularis	Paraglide 27	V. jugularis	9	0	0
2686	V-v ECMO	0	160	100	39.1	Rotaflow	Nautilus	2	Maquet 23Fr 38cm	V. femoralis	Maquet 21Fr 15cm	V. jugularis	0	0	0
2685	V-v ECMO	1	170	85	29.4	Cardiohelp	Cardiohelp 7.0	2	Maquet 23Fr 38cm	V. femoralis	Maquet 19 Fr 15cm	V. jugularis	4	0	0
2684	V-v ECMO	0	174	80	26.4	DP 3	Hilite LT	1	Maquet 23Fr 38cm	V. femoralis	Maquet 19Fr 23cm	V. jugularis	0	0	0
2681	V-v ECMO	1	180	100	30.9	Cardiohelp	Cardiohelp 7.0	1	Maquet 23Fr 38cm	V. femoralis	Maquet 21Fr 15cm	V. jugularis	0	0	0
2680	V-v ECMO	0	175	95	31	Cardiohelp	Cardiohelp 7.0	3	Maquet 21Fr 38cm	V. femoralis	Maquet 19 Fr 15cm	V. jugularis	14	3	4
2679	V-v ECMO	1	170	95	32.9	DP 3	Hilite LT	2	Maquet 23Fr 38cm	V. femoralis	Maquet 21Fr 15cm	V. jugularis	4	0	0
2678	V-v ECMO	0	162	70	26.7	Cardiohelp	Cardiohelp 5.0	4	Maquet 21Fr 38cm	V. femoralis	Maquet 17Fr 15cm	V. jugularis	18	0	0
2676	V-v ECMO	1	174	120	39.6	Cardiohelp	Cardiohelp 7.0	1	Maquet 25Fr 38cm	V. femoralis	Maquet 19 Fr 15cm	V. jugularis	0	0	0
2667	V-v ECMO	0	175	80	26.1	Cardiohelp	Cardiohelp 7.0	2	Maquet 21Fr 38cm	V. femoralis	Maquet 19 Fr 15cm	V. subclavia	5	0	0
2666	V-v ECMO	0	165	100	36.7	Cardiohelp	Cardiohelp 7.0	1	Maquet 21Fr 38cm	V. femoralis	Maquet 21Fr 55cm	V. femoralis	1	0	0
2664	V-v ECMO	0	175	90	29.4	Cardiohelp	Cardiohelp 7.0	3	Maquet 23Fr 38cm	V. femoralis	Maquet 21Fr 15cm	V. jugularis	3	0	0
2663	V-v ECMO	0	180	100	30.9	DP 3	Hilite LT	4	Maquet 23Fr 38cm	V. femoralis	Maquet 21Fr 15cm	V. jugularis	33	3	8
2660	V-v ECMO	0	170	72	24.9	Rotaflow	Nautilus	2	Maquet 21Fr 38cm	V. femoralis	Maquet 19 Fr 15cm	V. jugularis	1	0	0
2659	V-v ECMO	0	180	95	29.3	Cardiohelp	Cardiohelp 7.0	1	Maquet 21Fr 38cm	V. femoralis	Maquet 19 Fr 15cm	V.jugularis	0	0	0
2653	V-v ECMO	1	175	80	26.1	DP 3	Hilite LT	2	Maquet 21Fr 38cm	V. femoralis	Maquet 21Fr 55cm	V. femoralis	25	5	5
2651	V-v ECMO	0	185	130	38	Cardiohelp	Cardiohelp 7.0	3	Maquet 23Fr 38cm	V. femoralis	Maquet 19 Fr 15cm	V. jugularis	36	6	5
2648	V-v ECMO	1	185	95	27.8	Cardiohelp	Cardiohelp 7.0	3	Maquet 23Fr 38cm	V. femoralis	Maquet 19 Fr 15cm	V. jugularis	13	0	0
2645	V-v ECMO	0	195	130	34.2	DP 3	Hilite LT	2	Maquet 23Fr 38cm	V. femoralis	Maquet 21Fr 15cm	V. jugularis	12	0	0
2642	V-v ECMO	0	163	80	30.1	DP 3	Hilite LT	1	Maquet 21Fr 38cm	V. femoralis	Maquet 17Fr 15cm	V. jugularis	1	0	0
2639	V-v ECMO	1	170	68	23.5	Cardiohelp	Cardiohelp 7.0	2	Maquet 23Fr 38cm	V. femoralis	Maquet 19 Fr 15cm	V. jugularis	12	0	3
2637	V-v ECMO	1	160	65	25.4	DP 3	Hilite LT	1	Maquet 21Fr 38cm	V. femoralis	Maquet 19 Fr 15cm	V. jugularis	55	36	8
2632	V-v ECMO	0	175	130	42.4	Cardiohelp	Cardiohelp 7.0	1	Maquet 21Fr 38cm	V. femoralis	Maquet 19 Fr 15cm	V. jugularis	2	0	0
2612	V-v ECMO	0	175	74	24.2	Cardiohelp	Cardiohelp 7.0	1	Maquet 23Fr 38cm	V. femoralis	Maquet 21Fr 15cm	V. jugularis	0	0	0
2598	V-v ECMO	1	183	90	26.9	Cardiohelp	Cardiohelp 7.0	3	Maquet 21Fr 55cm	V. femoralis	Maquet 19 Fr 15cm	V. jugularis	9	4	0
2577	V-v ECMO	0	170	90	31.1	Cardiohelp	Cardiohelp 7.0	1	Maquet 21Fr 38cm	V. femoralis	Maquet 19 Fr 15cm	V. jugularis	0	2	0
2574	V-v ECMO	0	170	90	31.1	Cardiohelp	Cardiohelp 7.0	1	Maquet 21Fr 38cm	V. femoralis	Maquet 19 Fr 15cm	V. jugularis	2	0	0
2561	V-v ECMO	0	165	100	36.7	Cardiohelp	Cardiohelp 7.0	2	Maquet 23Fr 38cm	V. femoralis	Maquet 19 Fr 15cm	V. jugularis	2	0	0
2558	V-v ECMO	0	185	110	32.1	Cardiohelp	Cardiohelp 7.0	1	Maquet 23Fr 38cm	V. femoralis	Maquet 17Fr 15cm	V. jugularis	1	0	0
2556	V-v ECMO	1	175	120	39.2	Rotaflow	Paragon	1	Maquet 23Fr 38cm	V. femoralis	Maquet 17Fr 23 cm	V. jugularis	15	5	0
2554	V-v ECMO	0	180	120	37	Cardiohelp	Cardiohelp 7.0	2	Maquet 21Fr 38cm	V. femoralis	Maquet 19 Fr 15cm	V. jugularis	4	12	0
2553	V-v ECMO	0	185	85	24.8	Cardiohelp	Cardiohelp 7.0	2	Maquet 23Fr 38cm	V. femoralis	Maquet 19 Fr 15cm	V. jugularis	2	0	0
2549	V-v ECMO	1	165	90	33.1	DP 3	Hilite LT	1	Maquet 21Fr 55cm	V. femoralis	Maquet 17Fr 15cm	V. jugularis	11		2
2548	V-v ECMO	0	180	80	24.7	Rotaflow	Paragon	2	Maquet 21Fr 38cm	V. femoralis	NovaPort(R) 19	V. jugularis	5	2	2
2547	V-v ECMO	0	180	85	26.2	Rotaflow	Nautilus	2	Maquet 21Fr 38cm	V. femoralis	NovaPort(R) 19	V. jugularis	2	0	0
2545	V-v ECMO	0	172	70	23.7	DP 3	Hilite LT	1	Maquet 21Fr 38cm	V. femoralis	Maquet 19 Fr 15cm	V. jugularis	0	0	0
2543	V-v ECMO	0	180	90	27.8	Cardiohelp	Cardiohelp 7.0	1	Metronic Dual 28Fr	V. Jugularis	Metronic Dual 28Fr	V. jugularis	0	2	0
2542	V-v ECMO	0	185	100	29.2	Cardiohelp	Cardiohelp 7.0	2	Maquet 21Fr 38cm	V. femoralis	Maquet 17Fr 15cm	V. jugularis	1	0	0
2540	V-v ECMO	1	180	85	26.2	DP 3	Hilite LT	1	Maquet 21Fr 38cm	V. femoralis	Maquet 19 Fr 15cm	V. jugularis	13	3	0
2539	V-v ECMO	0	186	88	25.4	Rotaflow	Paragon	4	Maquet 23Fr 55cm	V. femoralis	Maquet 21Fr 15cm	V. jugularis	0	0	0
2535	V-v ECMO	0	175	90	29.4	DP 3	Hilite LT	2	Maquet 21Fr 55cm	V. femoralis	Maquet 21Fr 15cm	V. jugularis	2	0	0
2533	V-v ECMO	0	165	68	25	Cardiohelp	Cardiohelp 7.0	3	Maquet 21Fr 38cm	V. femoralis	Maquet 17Fr 15cm	V. jugularis	8	0	0
2529	V-v ECMO	0	170	80	27.7	Cardiohelp	Cardiohelp 7.0	1	Maquet 23Fr 38cm	V. femoralis	Maquet 19 Fr 15cm	V. jugularis	9	2	0
2528	V-v ECMO	1	167	75	26.9	Sorin/ Dideco	Nautilus	2	Maquet 21Fr 55cm	V. femoralis	Maquet 17Fr 15cm	V. jugularis	16	0	0
2527	V-v ECMO	0	183	110	32.8	Deltastream	Hilite LT	2	Maquet 21Fr 55cm	V. femoralis	Maquet 19 Fr 15cm	V. jugularis	1	0	0
2526	V-v ECMO	0	165	65	23.9	Deltastream	Hilite LT	1	Maquet 21Fr 55cm	V. femoralis	Maquet 19 Fr 15cm	V. jugularis	3	0	0
2525	V-v ECMO	0	170	80	27.7	Cardiohelp	Cardiohelp 7.0	1	Maquet 23Fr 38cm	V. femoralis	Maquet 19 Fr 15cm	V. jugularis	5	0	0
2521	V-v ECMO	1	168	110	39	Cardiohelp	Cardiohelp 7.0	2	Maquet 21Fr 38cm	V. femoralis	Maquet 19 Fr 15cm	V. jugularis	10	0	0
2519	V-v ECMO	0	170	77	26.6	DP 3	Hilite LT	4	Maquet 23Fr 38cm	V. femoralis	Maquet 17Fr 23 cm	V. jugularis	14	0	4
2510	V-v ECMO	1	170	140	48.4	DP 3	Hilite LT	2	Maquet 21Fr 38cm	V. femoralis	Maquet 19 Fr 15cm	V. jugularis	7	0	0
2509	V-v ECMO	0	175	140	45.7	Rotaflow	Paragon	2	Maquet 21Fr 55cm	V. femoralis	NovaPort(R) 19	V. jugularis	3	0	3
2504	V-v ECMO	1	173	86	28.7	Sorin/ Dideco	Paragon	1	Maquet 21Fr 38cm	V. femoralis	Metronik 15Fr 64cm	V. femoralis	0	2	0
2503	V-v ECMO	1	173	95	31.7	Rotaflow	PLS	2	Maquet 23Fr 38cm	V. femoralis	Maquet 19 Fr 15cm	V. jugularis	14	0	0
2502	V-v ECMO	0	180	120	37	Cardiohelp	Cardiohelp 7.0	1	Maquet 23Fr 38cm	V. femoralis	Maquet 19 Fr 15cm	V. jugularis	0	0	0
2500	V-v ECMO	0	170	80	27.7	Cardiohelp	Cardiohelp 7.0	1	Maquet 21Fr 38cm	V. femoralis	Maquet 19 Fr 15cm	V. jugularis	2	0	0
2498	V-v ECMO	1	180	95	29.3	Cardiohelp	Cardiohelp 7.0	1	Maquet 23Fr 38cm	V. femoralis	Maquet 19 Fr 15cm	V. jugularis	0	2	0
2497	V-v ECMO	0	170	70	24.2	Cardiohelp	Cardiohelp 7.0	2	Maquet 21Fr 38cm	V. femoralis	Maquet 17Fr 15cm	V. jugularis	0	0	1
2496	V-v ECMO	1	165	67	24.6	DP 3	Hilite LT	1	Maquet 21Fr 38cm	V. femoralis	Maquet 19 Fr 15cm	V. jugularis	8	0	0
2493	V-v ECMO	1	175	110	35.9	Cardiohelp	Cardiohelp 7.0	3	Maquet 21Fr 38cm	V. femoralis	Maquet 19 Fr 15cm	V. jugularis	55	30	3
2489	V-v ECMO	0	172	75	25.4	Rotaflow	PLS	1	Maquet 23Fr 38cm	V. femoralis	Maquet 15Fr 15cm	V. jugularis	1	2	1
2487	V-v ECMO	0	165	85	31.2	DP 3	Hilite LT	1	Maquet 21Fr 38cm	V. femoralis	Maquet 17Fr 15cm	V. jugularis	3	2	0
2486	V-v ECMO	1	170	80	27.7	Rotaflow	PLS	1	Maquet 21Fr 38cm	V. femoralis	Maquet 17Fr 15cm	V. jugularis	9	0	0
2483	V-v ECMO	0	165	130	47.8	DP 3	Hilite LT	1	Maquet 21Fr 38cm	V. femoralis	Maquet 19 Fr 15cm	V. jugularis	0	0	2
2480	V-v ECMO	1	175	85	27.8	Cardiohelp	Cardiohelp 7.0	3	Maquet 23Fr 38cm	V. femoralis	Maquet 19 Fr 15cm	V. jugularis	8	0	1
2478	V-v ECMO	1	180	100	30.9	DP 3	Hilite LT	3	Maquet 23Fr 38cm	V. femoralis	Maquet 19 Fr 15cm	V. jugularis	21	6	0
2477	V-v ECMO	0	170	80	27.7	DP 3	Hilite LT	3	Maquet 23Fr 38cm	V. femoralis	Maquet 19 Fr 15cm	V. jugularis	11	7	0
2476	V-v ECMO	1	170	75	26	Cardiohelp	Cardiohelp 7.0	1	Maquet 21Fr 38cm	V. femoralis	Maquet 17Fr 15cm	V. jugularis	3	1	0
2474	V-v ECMO	1	170	70	24.2	Cardiohelp	Cardiohelp 7.0	2	Maquet 21Fr 38cm	V. femoralis	Maquet 19 Fr 15cm	V. jugularis	28	0	0
2472	V-v ECMO	0	170	80	27.7	Rotaflow	PLS	1	Maquet 21Fr 38cm	V. femoralis	Maquet 17Fr 15cm	V. jugularis	3	0	0
2469	V-v ECMO	0	170	80	27.7	Cardiohelp	Cardiohelp IR	2	Maquet 21Fr 38cm	V. femoralis	Maquet 17Fr 15cm	V. jugularis	1	0	0
2457	V-v ECMO	1	165	75	27.5	Cardiohelp	Cardiohelp 7.0	1	Maquet 21Fr 38cm	V. femoralis	Maquet 17Fr 15cm	V. jugularis	2	0	0
2456	V-v ECMO	0	175	100	32.7	Rotaflow	PLS	3	Maquet 23Fr 38cm	V. femoralis	Maquet 21Fr 15cm	V. jugularis	0	0	0
2455	V-v ECMO	0	175	110	35.9	DP 3	Hilite LT	3	Maquet 23Fr 38cm	V. femoralis	Maquet 21Fr 15cm	V. jugularis	29	20	2
2454	V-v ECMO	1	180	90	27.8	DP 3	Hilite LT	1	Maquet 21Fr 38cm	V. femoralis	Maquet 19 Fr 15cm	V. jugularis	17	57	1
2453	V-v ECMO	1	180	90	27.8	Cardiohelp	Cardiohelp 7.0	1	Maquet 21Fr 38cm	V. femoralis	Maquet 19 Fr 15cm	V. jugularis	2	0	0
2451	V-v ECMO	1	185	95	27.8	DP 3	Hilite LT	1	Maquet 21Fr 38cm	V. femoralis	Maquet 19 Fr 15cm	V. jugularis	0	0	0
2450	V-v ECMO	1	180	80	24.7	Cardiohelp	Cardiohelp 7.0	3	Maquet 21Fr 38cm	V. femoralis	Maquet 19 Fr 15cm	V. jugularis	0	0	0
2444	V-v ECMO	1	160	60	23.4	DP 3	Hilite LT	1	Maquet 21Fr 38cm	V. femoralis	Maquet 19 Fr 15cm	V. jugularis	4	0	0
2443	V-v ECMO	1	155	50	20.8	Rotaflow	Paragon	2	Maquet 21Fr 38cm	V. femoralis	Maquet 17Fr 15cm	V. jugularis	13	6	2
2442	V-v ECMO	0	160	71	27.7	DP 3	Hilite LT	2	Maquet 21Fr 38cm	V. femoralis	Maquet 17Fr 15cm	V. jugularis	5	0	0
2441	V-v ECMO	1	160	90	35.2	Sorin/ Dideco	ECC.O 5	1	Maquet 21Fr 38cm	V. femoralis	Maquet 19 Fr 15cm	V. jugularis	7	0	1
2440	V-v ECMO	1	180	135	41.7	DP 3	Hilite LT	1	Maquet 21Fr 38cm	V. femoralis	Maquet 19 Fr 15cm	V. jugularis	6	43	0
2436	V-v ECMO	0	170	110	38.1	Cardiohelp	Cardiohelp 7.0	4	Maquet 21Fr 38cm	V. femoralis	Maquet 19 Fr 15cm	V. jugularis	7	3	0
2435	V-v ECMO	1	170	80	27.7	Rotaflow	Nautilus	1	Maquet 23Fr 38cm	V. femoralis	Maquet 21Fr 15cm	V. jugularis	2	0	0
2432	V-v ECMO	0	175	85	27.8	Rotaflow	Paragon	4	Maquet 21Fr 38cm	V. femoralis	Maquet 19 Fr 15cm	V. jugularis	16	6	1
2430	V-v ECMO	1	170	95	32.9	Rotaflow	Paragon	1	Maquet 23Fr 38cm	V. femoralis	Maquet 21Fr 15cm	V. jugularis	7	2	0
2429	V-v ECMO	1	175	75	24.5	Rotaflow	PLS	1	Maquet 21Fr 38cm	V. femoralis	Maquet 17Fr 15cm	V. jugularis	2	0	0
2426	V-v ECMO	0	170	71	24.6	Cardiohelp	Cardiohelp 7.0	2	Maquet 21Fr 38cm	V. femoralis	Maquet 19 Fr 15cm	V. jugularis	3	14	2
2423	V-v ECMO	0	180	130	40.1	DP 3	Hilite LT	1	Maquet 23Fr 38cm	V. femoralis	Maquet 21Fr 15cm	V. jugularis	6	43	0
2416	V-v ECMO	1	190	130	36	Cardiohelp	Cardiohelp 7.0	1	Maquet 23Fr 38cm	V. femoralis	Maquet 19 Fr 15cm	V. jugularis	5	2	0
2413	V-v ECMO	0	170	130	45	DP 3	Hilite LT	1	Maquet 21Fr 38cm	V. femoralis	Maquet 17Fr 15cm	V. jugularis	0	0	0
2412	V-v ECMO	1	170	90	31.1	Rotaflow	Paragon	2	Maquet 21Fr 38cm	V. femoralis	Maquet 17Fr 23 cm	V. jugularis	4	6	0
2410	V-v ECMO	0	165	65	23.9	DP 3	Hilite LT	2	Maquet 23Fr 38cm	V. femoralis	Maquet 19 Fr 15cm	V. jugularis	6	15	1
2409	V-v ECMO	1	165	80	29.4	Rotaflow	Nautilus	1	Maquet 23Fr 38cm	V. femoralis	Maquet 17Fr 23 cm	V. jugularis	17	13	2
2389	V-v ECMO	0	180	130	40.1	DP 3	Hilite LT	1	Maquet 21Fr 38cm	V. femoralis	Maquet 19 Fr 15cm	V. jugularis	0	0	0
2385	V-v ECMO	0	170	70	24.2	Sorin/ Dideco	ECC.O 5	1	Maquet 23Fr 38cm	V. femoralis	Maquet 19 Fr 15cm	V. jugularis	0	2	0
2364	V-v ECMO	0	184	110	32.5	Cardiohelp	Cardiohelp IR	2	Maquet 23Fr 38cm	V. femoralis	Maquet 19 Fr 15cm	V. jugularis	0	0	0
2305	V-v ECMO	1	170	90	31.1	Sorin/ Dideco	ECC.O 5	6	Novaport Twin 24Fr	V. femoralis	Novaport Twin 24Fr	V. jugularis	33	2	0
2303	V-v ECMO	0	170	80	27.7	DP 3	Hilite LT	5	Maquet 23Fr 38cm	V. femoralis	Maquet 19 Fr 15cm	V. jugularis	13	84	2
2297	V-v ECMO	1	173	110	36.8	Cardiohelp	Cardiohelp 7.0	1	Maquet 23Fr 38cm	V. femoralis	Maquet 19 Fr 15cm	V. jugularis	20	9	5
2296	V-v ECMO	0	160	58	22.7	DP 3	Hilite LT	2	Maquet 21Fr 38cm	V. femoralis	Maquet 17Fr 15cm	V. jugularis	7	2	0
2294	V-v ECMO	0	180	120	37	Cardiohelp	Cardiohelp 7.0	1	Maquet 23Fr 38cm	V. femoralis	Maquet 19 Fr 15cm	V. jugularis	8	3	0
2292	V-v ECMO	1	170	85	29.4	DP 3	Hilite LT	1	Maquet 21Fr 38cm	V. femoralis	Maquet 17Fr 23 cm	V. jugularis	15	2	0
2286	V-v ECMO	0	185	100	29.2	Sorin/ Dideco	ECC.O 5	2	Maquet 23Fr 38cm	V. femoralis	Maquet 21Fr 15cm	V. jugularis	20	12	3
2284	V-v ECMO	0	170	70	24.2	Rotaflow	Nautilus	2	Maquet 21Fr 38cm	V. femoralis	NovaPort(R) 17	V. jugularis	6	0	0
2283	V-v ECMO	0	185	140	40.9	DP 3	Hilite LT	2	Maquet 23Fr 38cm	V. femoralis	Maquet 21Fr 15cm	V. jugularis	8	0	0
2281	V-v ECMO	0	172	80	27	Rotaflow	Nautilus	5	Maquet 21Fr 38cm	V. femoralis	Maquet 19 Fr 15cm	V. jugularis	17	0	0
2276	V-v ECMO	0	180	130	40.1	Cardiohelp	Cardiohelp 7.0	3	Maquet 23Fr 38cm	V. femoralis	Maquet 21Fr 15cm	V. jugularis	8	0	0
2275	V-v ECMO	0	164	80	29.7	Sorin/ Dideco	ECC.O 5	1	Maquet 21Fr 38cm	V. femoralis	Maquet 17Fr 15cm	V. jugularis	4	0	1
2274	V-v ECMO	0	167	60	21.5	DP 3	Hilite LT	2	Maquet 21Fr 38cm	V. femoralis	Maquet 21Fr 15cm	V. jugularis	15	6	7
2273	V-v ECMO	0	170	85	29.4	DP 3	Hilite LT	1	Maquet 23Fr 38cm	V. femoralis	Maquet 17Fr 15cm	V. jugularis	0	0	0
